# Supplementary material for: Interactive Compliance Control of a Wrist Rehabilitation Device (WReD) with Enhanced Training Safety
Source: J Healthc Eng. 2019 Feb 18;2019:6537848. doi: 10.1155/2019/6537848 (PMC6409001; doi:10.1155/2019/6537848)
Supplement: Supplementary Materials — The original data of Experiment 1 to Experiment 4 are included. The data file of each experiment contains four columns named Time (second), Desired Angle (degree), Interaction Torque (Nm), and Measured Angle (degree). Figures 4–7 were derived from the original data of Experiment 1 to Experiment 4 by using MATLAB. Below are the descriptions of the four experiments: Experiment 1: the trajectory tracking responses with zero load. Experiment 2: the trajectory tracking responses with passive training. Experiment 3: the trajectory tracking responses with K = 0.8. Experiment 4: the trajectory tracking responses with K = 1.6. [file 6537848.f1.zip]

Archive with 4 entries (4 files):
- 6537848.f1/Experiment 1.xls
- 6537848.f1/Experiment 2.xls
- 6537848.f1/Experiment 3.xls
- 6537848.f1/Experiment 4.xls
