# Supplementary material for: Interactive Compliance Control of a Wrist Rehabilitation Device (WReD) with Enhanced Training Safety
Source: J Healthc Eng. 2019 Feb 18;2019:6537848. doi: 10.1155/2019/6537848 (PMC6409001; doi:10.1155/2019/6537848)
Supplement: Supplementary Materials — The original data of Experiment 1 to Experiment 4 are included. The data file of each experiment contains four columns named Time (second), Desired Angle (degree), Interaction Torque (Nm), and Measured Angle (degree). Figures 4–7 were derived from the original data of Experiment 1 to Experiment 4 by using MATLAB. Below are the descriptions of the four experiments: Experiment 1: the trajectory tracking responses with zero load. Experiment 2: the trajectory tracking responses with passive training. Experiment 3: the trajectory tracking responses with K = 0.8. Experiment 4: the trajectory tracking responses with K = 1.6. [file 6537848.f1.zip › 6537848.f1/Experiment 1.xls]

## Sheet: Alldata_empty
Time	Desired	Interaction Torque	Measured
0	0.161	0.545	0
0.02	0.073	0.541	0.408
0.04	0.073	0.527	0.817
0.06	0.073	0.491	1.225
0.08	0.117	0.43	1.633
0.1	0.117	0.355	2.042
0.12	0.204	0.285	2.45
0.14	0.424	0.23	2.858
0.16	0.644	0.188	3.266
0.18	0.864	0.153	3.674
0.2	1.083	0.124	4.081
0.22	1.743	0.105	4.489
0.24	2.05	0.099	4.896
0.26	2.534	0.099	5.303
0.28	3.061	0.099	5.71
0.3	3.764	0.096	6.117
0.32	4.247	0.094	6.524
0.34	4.863	0.096	6.93
0.36	5.566	0.099	7.336
0.38	5.961	0.1	7.741
0.4	6.401	0.099	8.147
0.42	7.104	0.097	8.552
0.44	7.28	0.098	8.956
0.46	7.807	0.099	9.361
0.48	8.29	0.1	9.765
0.5	8.466	0.1	10.168
0.52	8.818	0.096	10.571
0.54	8.994	0.092	10.974
0.56	9.609	0.087	11.376
0.58	9.829	0.084	11.778
0.6	10.092	0.085	12.18
0.62	10.576	0.09	12.581
0.64	10.971	0.094	12.981
0.66	11.147	0.095	13.381
0.68	11.454	0.091	13.78
0.7	12.07	0.082	14.179
0.72	12.465	0.074	14.578
0.74	12.817	0.071	14.975
0.76	13.344	0.072	15.372
0.78	13.828	0.074	15.769
0.8	14.355	0.075	16.165
0.82	14.662	0.075	16.56
0.84	15.19	0.075	16.955
0.86	15.454	0.075	17.349
0.88	15.849	0.075	17.742
0.9	16.464	0.073	18.134
0.92	16.772	0.072	18.526
0.94	17.167	0.069	18.917
0.96	17.607	0.066	19.308
0.98	17.914	0.062	19.697
1	18.398	0.058	20.086
1.02	18.53	0.058	20.474
1.04	19.057	0.059	20.861
1.06	19.277	0.062	21.248
1.08	19.628	0.064	21.633
1.1	20.024	0.064	22.018
1.12	20.331	0.063	22.402
1.14	20.903	0.061	22.785
1.16	21.298	0.059	23.167
1.18	21.694	0.057	23.548
1.2	22.001	0.055	23.928
1.22	22.485	0.051	24.307
1.24	22.836	0.048	24.686
1.26	23.32	0.048	25.063
1.28	23.627	0.053	25.439
1.3	24.155	0.058	25.815
1.32	24.462	0.062	26.189
1.34	25.078	0.06	26.562
1.36	25.253	0.056	26.934
1.38	25.605	0.052	27.306
1.4	25.912	0.048	27.676
1.42	26.176	0.045	28.045
1.44	26.572	0.042	28.413
1.46	27.143	0.036	28.779
1.48	27.407	0.03	29.145
1.5	27.89	0.022	29.509
1.52	28.329	0.016	29.873
1.54	28.549	0.015	30.235
1.56	28.813	0.018	30.596
1.58	29.296	0.021	30.955
1.6	29.692	0.024	31.314
1.62	30.043	0.025	31.671
1.64	30.351	0.025	32.027
1.66	30.834	0.025	32.382
1.68	31.01	0.026	32.736
1.7	31.274	0.025	33.088
1.72	31.669	0.022	33.439
1.74	32.065	0.022	33.788
1.76	32.504	0.022	34.136
1.78	32.548	0.023	34.483
1.8	32.988	0.019	34.829
1.82	33.515	0.012	35.173
1.84	33.779	0.006	35.516
1.86	34.306	0	35.857
1.88	34.921	-0.002	36.197
1.9	35.009	0.003	36.535
1.92	35.537	0.004	36.872
1.94	35.8	0.005	37.208
1.96	36.02	0.002	37.542
1.98	36.328	-0.003	37.875
2	36.811	-0.007	38.206
2.02	37.075	-0.007	38.536
2.04	37.47	-0.006	38.864
2.06	37.734	-0.006	39.19
2.08	37.997	-0.007	39.515
2.1	38.261	-0.009	39.839
2.12	38.613	-0.012	40.161
2.14	39.008	-0.014	40.481
2.16	39.316	-0.015	40.8
2.18	39.623	-0.018	41.117
2.2	39.975	-0.021	41.433
2.22	40.502	-0.025	41.746
2.24	40.634	-0.023	42.059
2.26	41.03	-0.021	42.369
2.28	41.293	-0.019	42.678
2.3	41.645	-0.021	42.985
2.32	42.04	-0.028	43.291
2.34	42.128	-0.033	43.595
2.36	42.744	-0.041	43.897
2.38	42.831	-0.041	44.197
2.4	43.139	-0.039	44.496
2.42	43.579	-0.037	44.792
2.44	43.842	-0.034	45.087
2.46	43.974	-0.031	45.381
2.48	44.326	-0.031	45.672
2.5	44.457	-0.03	45.962
2.52	44.985	-0.033	46.25
2.54	45.117	-0.033	46.536
2.56	45.688	-0.038	46.82
2.58	45.688	-0.04	47.102
2.6	46.127	-0.044	47.383
2.62	46.479	-0.046	47.662
2.64	46.479	-0.043	47.938
2.66	47.05	-0.047	48.213
2.68	47.27	-0.05	48.486
2.7	47.534	-0.055	48.757
2.72	47.841	-0.057	49.026
2.74	48.061	-0.056	49.294
2.76	48.412	-0.054	49.559
2.78	48.588	-0.052	49.822
2.8	48.94	-0.053	50.083
2.82	49.379	-0.055	50.343
2.84	49.511	-0.056	50.6
2.86	49.819	-0.058	50.855
2.88	50.17	-0.061	51.109
2.9	50.258	-0.061	51.36
2.92	50.654	-0.062	51.609
2.94	50.742	-0.059	51.857
2.96	51.093	-0.058	52.102
2.98	51.313	-0.059	52.345
3	51.708	-0.062	52.586
3.02	51.708	-0.063	52.825
3.04	52.016	-0.066	53.062
3.06	52.104	-0.067	53.297
3.08	52.543	-0.07	53.53
3.1	52.543	-0.07	53.76
3.12	53.027	-0.073	53.989
3.14	53.29	-0.075	54.215
3.16	53.334	-0.074	54.439
3.18	53.774	-0.076	54.661
3.2	53.906	-0.075	54.881
3.22	54.213	-0.075	55.099
3.24	54.521	-0.077	55.315
3.26	54.697	-0.08	55.528
3.28	54.96	-0.083	55.739
3.3	55.18	-0.084	55.948
3.32	55.224	-0.082	56.155
3.34	55.576	-0.082	56.36
3.36	55.839	-0.082	56.562
3.38	55.927	-0.084	56.762
3.4	56.191	-0.089	56.96
3.42	56.367	-0.092	57.156
3.44	56.411	-0.093	57.349
3.46	56.806	-0.095	57.54
3.48	56.938	-0.093	57.729
3.5	57.333	-0.093	57.915
3.52	57.465	-0.092	58.1
3.54	57.597	-0.093	58.282
3.56	57.949	-0.097	58.461
3.58	58.08	-0.098	58.639
3.6	58.3	-0.097	58.814
3.62	58.344	-0.091	58.986
3.64	58.564	-0.086	59.157
3.66	58.696	-0.082	59.325
3.68	58.74	-0.079	59.491
3.7	58.871	-0.079	59.654
3.72	59.135	-0.082	59.815
3.74	59.223	-0.083	59.974
3.76	59.443	-0.084	60.13
3.78	59.706	-0.085	60.284
3.8	59.882	-0.085	60.435
3.82	59.97	-0.086	60.585
3.84	60.102	-0.09	60.731
3.86	60.366	-0.097	60.876
3.88	60.41	-0.102	61.018
3.9	60.629	-0.108	61.157
3.92	60.849	-0.113	61.294
3.94	60.893	-0.116	61.429
3.96	61.025	-0.118	61.561
3.98	61.157	-0.119	61.691
4	61.332	-0.122	61.819
4.02	61.464	-0.125	61.944
4.04	61.64	-0.129	62.066
4.06	61.772	-0.13	62.186
4.08	61.86	-0.13	62.304
4.1	62.079	-0.128	62.419
4.12	62.299	-0.127	62.532
4.14	62.343	-0.126	62.642
4.16	62.431	-0.126	62.75
4.18	62.607	-0.128	62.855
4.2	62.651	-0.126	62.958
4.22	62.651	-0.122	63.058
4.24	62.695	-0.117	63.156
4.26	63.002	-0.115	63.251
4.28	63.046	-0.112	63.344
4.3	63.09	-0.112	63.435
4.32	63.09	-0.114	63.522
4.34	63.354	-0.119	63.608
4.36	63.486	-0.121	63.691
4.38	63.618	-0.122	63.771
4.4	63.662	-0.122	63.849
4.42	63.749	-0.121	63.924
4.44	63.749	-0.118	63.997
4.46	63.837	-0.116	64.067
4.48	63.969	-0.116	64.135
4.5	64.145	-0.117	64.2
4.52	64.189	-0.119	64.262
4.54	64.277	-0.122	64.322
4.56	64.321	-0.124	64.38
4.58	64.365	-0.125	64.435
4.6	64.409	-0.126	64.487
4.62	64.409	-0.126	64.537
4.64	64.496	-0.127	64.585
4.66	64.54	-0.128	64.63
4.68	64.54	-0.129	64.672
4.7	64.628	-0.13	64.712
4.72	64.716	-0.13	64.749
4.74	64.76	-0.129	64.783
4.76	64.848	-0.129	64.815
4.78	64.892	-0.13	64.845
4.8	64.936	-0.132	64.872
4.82	64.936	-0.133	64.896
4.84	65.024	-0.134	64.918
4.86	65.024	-0.134	64.937
4.88	65.024	-0.134	64.954
4.9	65.024	-0.134	64.968
4.92	65.024	-0.134	64.979
4.94	65.024	-0.135	64.988
4.96	65.024	-0.136	64.995
4.98	65.156	-0.138	64.999
5	65.2	-0.138	65
5.02	65.244	-0.138	64.999
5.04	65.244	-0.138	64.995
5.06	65.244	-0.136	64.988
5.08	65.2	-0.131	64.979
5.1	65.2	-0.124	64.968
5.12	65.2	-0.115	64.954
5.14	65.2	-0.103	64.937
5.16	65.156	-0.09	64.918
5.18	65.156	-0.076	64.896
5.2	65.156	-0.063	64.872
5.22	65.112	-0.049	64.845
5.24	65.068	-0.036	64.815
5.26	65.112	-0.025	64.783
5.28	65.068	-0.014	64.749
5.3	65.068	-0.004	64.712
5.32	65.068	0.005	64.672
5.34	65.024	0.014	64.63
5.36	64.98	0.022	64.585
5.38	64.98	0.03	64.537
5.4	64.892	0.039	64.487
5.42	64.848	0.045	64.435
5.44	64.804	0.05	64.38
5.46	64.672	0.054	64.322
5.48	64.628	0.057	64.262
5.5	64.628	0.06	64.2
5.52	64.584	0.063	64.135
5.54	64.453	0.066	64.067
5.56	64.365	0.068	63.997
5.58	64.321	0.069	63.924
5.6	64.321	0.069	63.849
5.62	64.233	0.07	63.771
5.64	64.233	0.07	63.691
5.66	64.233	0.071	63.608
5.68	64.233	0.071	63.522
5.7	64.101	0.073	63.435
5.72	64.057	0.074	63.344
5.74	63.969	0.075	63.251
5.76	63.793	0.077	63.156
5.78	63.574	0.08	63.058
5.8	63.53	0.08	62.958
5.82	63.442	0.078	62.855
5.84	63.354	0.076	62.75
5.86	63.354	0.073	62.642
5.88	63.222	0.074	62.532
5.9	63.134	0.075	62.419
5.92	63.002	0.077	62.304
5.94	62.958	0.079	62.186
5.96	62.695	0.083	62.066
5.98	62.695	0.083	61.944
6	62.519	0.084	61.819
6.02	62.519	0.081	61.691
6.04	62.475	0.075	61.561
6.06	62.255	0.069	61.429
6.08	61.992	0.064	61.294
6.1	61.948	0.059	61.157
6.12	61.772	0.057	61.018
6.14	61.728	0.057	60.876
6.16	61.684	0.057	60.731
6.18	61.508	0.058	60.585
6.2	61.201	0.061	60.435
6.22	61.113	0.062	60.284
6.24	61.025	0.064	60.13
6.26	60.805	0.066	59.974
6.28	60.805	0.066	59.815
6.3	60.541	0.067	59.654
6.32	60.366	0.069	59.491
6.34	60.322	0.071	59.325
6.36	60.146	0.076	59.157
6.38	59.926	0.081	58.986
6.4	59.882	0.084	58.814
6.42	59.443	0.09	58.639
6.44	59.443	0.093	58.461
6.46	59.267	0.1	58.282
6.48	59.091	0.107	58.1
6.5	58.871	0.112	57.915
6.52	58.784	0.115	57.729
6.54	58.74	0.117	57.54
6.56	58.476	0.122	57.349
6.58	58.168	0.126	57.156
6.6	58.08	0.127	56.96
6.62	57.905	0.124	56.762
6.64	57.641	0.119	56.562
6.66	57.553	0.111	56.36
6.68	57.465	0.103	56.155
6.7	56.982	0.101	55.948
6.72	56.762	0.098	55.739
6.74	56.762	0.096	55.528
6.76	56.323	0.098	55.315
6.78	56.191	0.099	55.099
6.8	55.883	0.1	54.881
6.82	55.795	0.1	54.661
6.84	55.707	0.101	54.439
6.86	55.532	0.102	54.215
6.88	55.268	0.106	53.989
6.9	55.004	0.11	53.76
6.92	54.872	0.114	53.53
6.94	54.477	0.12	53.297
6.96	54.433	0.121	53.062
6.98	54.125	0.122	52.825
7	53.862	0.119	52.586
7.02	53.686	0.116	52.345
7.04	53.29	0.117	52.102
7.06	53.159	0.116	51.857
7.08	52.763	0.12	51.609
7.1	52.587	0.122	51.36
7.12	52.192	0.127	51.109
7.14	52.06	0.127	50.855
7.16	51.884	0.127	50.6
7.18	51.752	0.126	50.343
7.2	51.533	0.125	50.083
7.22	51.005	0.128	49.822
7.24	50.961	0.129	49.559
7.26	50.786	0.131	49.294
7.28	50.61	0.133	49.026
7.3	49.951	0.137	48.757
7.32	49.907	0.135	48.486
7.34	49.731	0.135	48.213
7.36	49.511	0.135	47.938
7.38	49.16	0.136	47.662
7.4	48.852	0.136	47.383
7.42	48.632	0.135	47.102
7.44	48.237	0.135	46.82
7.46	48.061	0.136	46.536
7.48	47.885	0.137	46.25
7.5	47.358	0.141	45.962
7.52	47.226	0.14	45.672
7.54	46.874	0.14	45.381
7.56	46.655	0.138	45.087
7.58	46.259	0.138	44.792
7.6	45.952	0.139	44.496
7.62	45.688	0.142	44.197
7.64	45.556	0.146	43.897
7.66	45.029	0.153	43.595
7.68	44.941	0.155	43.291
7.7	44.457	0.158	42.985
7.72	44.282	0.158	42.678
7.74	44.018	0.16	42.369
7.76	43.842	0.163	42.059
7.78	43.315	0.169	41.746
7.8	43.095	0.171	41.433
7.82	42.787	0.172	41.117
7.84	42.392	0.171	40.8
7.86	42.04	0.171	40.481
7.88	41.821	0.17	40.161
7.9	41.513	0.168	39.839
7.92	41.03	0.166	39.515
7.94	40.634	0.166	39.19
7.96	40.59	0.166	38.864
7.98	40.414	0.171	38.536
8	39.843	0.18	38.206
8.02	39.536	0.185	37.875
8.04	39.404	0.183	37.542
8.06	38.788	0.181	37.208
8.08	38.525	0.176	36.872
8.1	38.305	0.172	36.535
8.12	38.129	0.171	36.197
8.14	37.47	0.177	35.857
8.16	37.338	0.18	35.516
8.18	36.899	0.187	35.173
8.2	36.547	0.194	34.829
8.22	36.196	0.201	34.483
8.24	35.932	0.203	34.136
8.26	35.449	0.201	33.788
8.28	35.053	0.194	33.439
8.3	34.746	0.188	33.088
8.32	34.306	0.187	32.736
8.34	34.306	0.189	32.382
8.36	33.823	0.195	32.027
8.38	33.647	0.198	31.671
8.4	33.251	0.198	31.314
8.42	32.988	0.198	30.955
8.44	32.416	0.201	30.596
8.46	32.372	0.204	30.235
8.48	31.669	0.212	29.873
8.5	31.362	0.217	29.509
8.52	30.878	0.22	29.145
8.54	30.746	0.22	28.779
8.56	30.131	0.219	28.413
8.58	29.736	0.218	28.045
8.6	29.648	0.218	27.676
8.62	29.033	0.222	27.306
8.64	28.725	0.225	26.934
8.66	28.461	0.228	26.562
8.68	28.066	0.23	26.189
8.7	27.714	0.231	25.815
8.72	27.319	0.231	25.439
8.74	27.143	0.227	25.063
8.76	26.528	0.224	24.686
8.78	26.22	0.221	24.307
8.8	25.912	0.222	23.928
8.82	25.429	0.226	23.548
8.84	25.209	0.231	23.167
8.86	24.902	0.235	22.785
8.88	24.418	0.239	22.402
8.9	23.979	0.243	22.018
8.92	23.583	0.249	21.633
8.94	23.32	0.255	21.248
8.96	22.836	0.261	20.861
8.98	22.441	0.264	20.474
9	21.826	0.265	20.086
9.02	21.562	0.263	19.697
9.04	21.386	0.259	19.308
9.06	20.815	0.257	18.917
9.08	20.507	0.253	18.526
9.1	20.112	0.251	18.134
9.12	19.76	0.249	17.742
9.14	19.189	0.251	17.349
9.16	19.189	0.254	16.955
9.18	18.662	0.259	16.56
9.2	18.178	0.263	16.165
9.22	17.783	0.264	15.769
9.24	17.387	0.263	15.372
9.26	17.036	0.261	14.975
9.28	16.464	0.26	14.578
9.3	16.069	0.26	14.179
9.32	15.717	0.261	13.78
9.34	15.322	0.261	13.381
9.36	14.97	0.261	12.981
9.38	14.355	0.26	12.581
9.4	14.091	0.259	12.18
9.42	13.696	0.258	11.778
9.44	13.432	0.258	11.376
9.46	12.993	0.262	10.974
9.48	12.553	0.267	10.571
9.5	12.289	0.271	10.168
9.52	11.85	0.276	9.765
9.54	11.411	0.278	9.361
9.56	11.059	0.277	8.956
9.58	10.62	0.276	8.552
9.6	10.268	0.277	8.147
9.62	9.916	0.282	7.741
9.64	9.345	0.291	7.336
9.66	8.95	0.296	6.93
9.68	8.686	0.295	6.524
9.7	8.203	0.29	6.117
9.72	7.631	0.285	5.71
9.74	7.148	0.285	5.303
9.76	6.708	0.288	4.896
9.78	6.357	0.292	4.489
9.8	6.049	0.293	4.081
9.82	5.61	0.292	3.674
9.84	5.346	0.288	3.266
9.86	4.863	0.284	2.858
9.88	4.423	0.284	2.45
9.9	4.028	0.286	2.042
9.92	3.676	0.291	1.633
9.94	3.193	0.296	1.225
9.96	2.753	0.297	0.817
9.98	2.578	0.296	0.408
10	2.05	0.293	0
10.02	1.655	0.292	-0.408
10.04	1.171	0.293	-0.817
10.06	0.908	0.297	-1.225
10.08	0.38	0.301	-1.633
10.1	-0.059	0.305	-2.513
10.12	-0.499	0.307	-3.015
10.14	-0.938	0.309	-3.517
10.16	-1.378	0.309	-4.02
10.18	-1.685	0.308	-4.521
10.2	-2.256	0.307	-5.023
10.22	-2.74	0.308	-5.525
10.24	-3.223	0.31	-6.026
10.26	-3.882	0.313	-6.527
10.28	-4.322	0.315	-7.028
10.3	-4.893	0.316	-7.529
10.32	-5.421	0.316	-8.029
10.34	-6.036	0.316	-8.529
10.36	-6.563	0.317	-9.029
10.38	-7.222	0.317	-9.528
10.4	-7.794	0.318	-10.027
10.42	-8.145	0.318	-10.525
10.44	-8.848	0.318	-11.023
10.46	-9.376	0.317	-11.521
10.48	-9.859	0.316	-12.018
10.5	-10.254	0.317	-12.515
10.52	-10.782	0.321	-13.011
10.54	-11.221	0.326	-13.507
10.56	-11.705	0.328	-14.002
10.58	-12.188	0.327	-14.496
10.6	-12.628	0.323	-14.991
10.62	-13.023	0.321	-15.484
10.64	-13.463	0.321	-15.977
10.66	-14.122	0.319	-16.469
10.68	-14.473	0.317	-16.961
10.7	-14.957	0.314	-17.451
10.72	-15.528	0.313	-17.942
10.74	-15.836	0.316	-18.431
10.76	-16.495	0.321	-18.92
10.78	-17.066	0.326	-19.408
10.8	-17.637	0.329	-19.895
10.82	-18.121	0.331	-20.382
10.84	-18.648	0.33	-20.867
10.86	-19.044	0.325	-21.352
10.88	-19.571	0.317	-21.836
10.9	-20.054	0.311	-22.319
10.92	-20.626	0.309	-22.802
10.94	-21.109	0.314	-23.283
10.96	-21.548	0.32	-23.763
10.98	-22.032	0.323	-24.243
11	-22.603	0.321	-24.721
11.02	-22.999	0.32	-25.199
11.04	-23.394	0.321	-25.675
11.06	-23.921	0.325	-26.151
11.08	-24.317	0.33	-26.626
11.1	-24.888	0.331	-27.099
11.12	-25.372	0.329	-27.571
11.14	-25.767	0.327	-28.043
11.16	-26.295	0.325	-28.513
11.18	-26.778	0.324	-28.982
11.2	-27.261	0.322	-29.45
11.22	-27.789	0.32	-29.917
11.24	-28.184	0.317	-30.382
11.26	-28.799	0.314	-30.847
11.28	-29.151	0.314	-31.31
11.3	-29.722	0.316	-31.772
11.32	-30.206	0.321	-32.233
11.34	-30.557	0.328	-32.692
11.36	-30.997	0.331	-33.15
11.38	-31.524	0.329	-33.607
11.4	-32.007	0.323	-34.062
11.42	-32.403	0.316	-34.516
11.44	-32.842	0.31	-34.969
11.46	-33.37	0.305	-35.421
11.48	-33.765	0.303	-35.871
11.5	-34.293	0.303	-36.319
11.52	-34.732	0.305	-36.766
11.54	-35.171	0.31	-37.212
11.56	-35.655	0.313	-37.656
11.58	-36.138	0.314	-38.099
11.6	-36.578	0.313	-38.54
11.62	-36.973	0.314	-38.98
11.64	-37.501	0.314	-39.418
11.66	-37.94	0.315	-39.855
11.68	-38.379	0.313	-40.29
11.7	-38.819	0.309	-40.723
11.72	-39.302	0.306	-41.155
11.74	-39.698	0.306	-41.585
11.76	-40.093	0.308	-42.014
11.78	-40.621	0.308	-42.441
11.8	-41.016	0.307	-42.866
11.82	-41.456	0.305	-43.29
11.84	-41.895	0.302	-43.712
11.86	-42.247	0.3	-44.132
11.88	-42.686	0.297	-44.55
11.9	-43.126	0.294	-44.967
11.92	-43.477	0.292	-45.382
11.94	-43.961	0.292	-45.795
11.96	-44.444	0.293	-46.206
11.98	-44.839	0.296	-46.615
12	-45.235	0.298	-47.023
12.02	-45.63	0.3	-47.429
12.04	-46.026	0.302	-47.832
12.06	-46.509	0.302	-48.234
12.08	-46.949	0.302	-48.634
12.1	-47.344	0.301	-49.033
12.12	-47.696	0.297	-49.429
12.14	-48.179	0.289	-49.823
12.16	-48.531	0.282	-50.215
12.18	-48.926	0.277	-50.606
12.2	-49.322	0.277	-50.994
12.22	-49.673	0.28	-51.38
12.24	-50.113	0.283	-51.764
12.26	-50.552	0.285	-52.147
12.28	-50.948	0.285	-52.527
12.3	-51.299	0.284	-52.905
12.32	-51.739	0.284	-53.281
12.34	-52.046	0.285	-53.655
12.36	-52.486	0.285	-54.027
12.38	-52.838	0.286	-54.396
12.4	-53.233	0.284	-54.764
12.42	-53.629	0.281	-55.129
12.44	-53.936	0.277	-55.492
12.46	-54.288	0.27	-55.853
12.48	-54.727	0.261	-56.212
12.5	-55.123	0.253	-56.569
12.52	-55.43	0.251	-56.923
12.54	-55.738	0.255	-57.275
12.56	-56.133	0.26	-57.625
12.58	-56.441	0.267	-57.972
12.6	-56.793	0.269	-58.317
12.62	-57.188	0.268	-58.66
12.64	-57.54	0.266	-59.001
12.66	-57.891	0.264	-59.339
12.68	-58.331	0.263	-59.675
12.7	-58.55	0.265	-60.009
12.72	-58.946	0.266	-60.34
12.74	-59.254	0.268	-60.669
12.76	-59.649	0.267	-60.995
12.78	-60.045	0.265	-61.319
12.8	-60.352	0.262	-61.641
12.82	-60.66	0.259	-61.96
12.84	-60.923	0.257	-62.277
12.86	-61.231	0.257	-62.591
12.88	-61.539	0.258	-62.903
12.9	-61.802	0.261	-63.212
12.92	-62.198	0.263	-63.519
12.94	-62.505	0.264	-63.824
12.96	-62.813	0.259	-64.125
12.98	-63.209	0.251	-64.425
13	-63.604	0.242	-64.721
13.02	-63.912	0.235	-65.016
13.04	-64.219	0.23	-65.307
13.06	-64.483	0.228	-65.596
13.08	-64.922	0.228	-65.883
13.1	-65.054	0.233	-66.166
13.12	-65.45	0.236	-66.448
13.14	-65.626	0.242	-66.726
13.16	-65.889	0.245	-67.002
13.18	-66.197	0.244	-67.276
13.2	-66.461	0.242	-67.546
13.22	-66.636	0.241	-67.814
13.24	-66.944	0.238	-68.08
13.26	-67.296	0.234	-68.342
13.28	-67.515	0.23	-68.602
13.3	-67.911	0.224	-68.859
13.32	-68.218	0.221	-69.114
13.34	-68.394	0.219	-69.366
13.36	-68.702	0.217	-69.615
13.38	-68.921	0.216	-69.861
13.4	-69.273	0.216	-70.105
13.42	-69.405	0.22	-70.345
13.44	-69.581	0.226	-70.583
13.46	-69.976	0.229	-70.819
13.48	-70.24	0.23	-71.051
13.5	-70.46	0.229	-71.281
13.52	-70.635	0.227	-71.507
13.54	-70.899	0.222	-71.731
13.56	-71.163	0.216	-71.952
13.58	-71.251	0.213	-72.171
13.6	-71.558	0.211	-72.386
13.62	-71.778	0.214	-72.599
13.64	-71.998	0.219	-72.808
13.66	-72.129	0.225	-73.015
13.68	-72.525	0.227	-73.219
13.7	-72.701	0.229	-73.42
13.72	-72.964	0.229	-73.619
13.74	-73.228	0.226	-73.814
13.76	-73.316	0.223	-74.006
13.78	-73.492	0.217	-74.196
13.8	-73.799	0.209	-74.382
13.82	-73.975	0.203	-74.566
13.84	-74.151	0.199	-74.746
13.86	-74.415	0.198	-74.924
13.88	-74.503	0.201	-75.099
13.9	-74.678	0.204	-75.27
13.92	-74.81	0.206	-75.439
13.94	-75.03	0.205	-75.605
13.96	-75.162	0.202	-75.768
13.98	-75.425	0.197	-75.928
14	-75.601	0.194	-76.085
14.02	-75.689	0.192	-76.238
14.04	-75.909	0.191	-76.389
14.06	-76.085	0.19	-76.537
14.08	-76.26	0.189	-76.682
14.1	-76.48	0.189	-76.823
14.12	-76.48	0.193	-76.962
14.14	-76.656	0.196	-77.098
14.16	-76.876	0.2	-77.231
14.18	-76.963	0.204	-77.36
14.2	-77.095	0.204	-77.487
14.22	-77.227	0.201	-77.61
14.24	-77.447	0.197	-77.731
14.26	-77.535	0.193	-77.848
14.28	-77.711	0.191	-77.962
14.3	-77.842	0.19	-78.073
14.32	-77.886	0.19	-78.181
14.34	-78.018	0.19	-78.286
14.36	-78.282	0.189	-78.388
14.38	-78.282	0.192	-78.487
14.4	-78.326	0.196	-78.583
14.42	-78.414	0.2	-78.676
14.44	-78.502	0.201	-78.765
14.46	-78.633	0.2	-78.852
14.48	-78.677	0.199	-78.935
14.5	-78.809	0.196	-79.015
14.52	-78.985	0.193	-79.092
14.54	-79.117	0.19	-79.166
14.56	-79.205	0.189	-79.237
14.58	-79.293	0.189	-79.305
14.6	-79.337	0.189	-79.369
14.62	-79.38	0.19	-79.431
14.64	-79.38	0.191	-79.489
14.66	-79.468	0.193	-79.544
14.68	-79.556	0.195	-79.596
14.7	-79.6	0.197	-79.645
14.72	-79.732	0.198	-79.691
14.74	-79.776	0.199	-79.733
14.76	-79.776	0.199	-79.773
14.78	-79.864	0.199	-79.809
14.8	-79.908	0.199	-79.842
14.82	-79.908	0.199	-79.872
14.84	-79.996	0.198	-79.899
14.86	-79.996	0.197	-79.923
14.88	-80.04	0.195	-79.943
14.9	-80.128	0.194	-79.961
14.92	-80.171	0.194	-79.975
14.94	-80.171	0.195	-79.986
14.96	-80.171	0.196	-79.994
14.98	-80.171	0.197	-79.998
15	-80.215	0.196	-80
15.02	-80.215	0.196	-79.998
15.04	-80.215	0.196	-79.994
15.06	-80.215	0.197	-79.986
15.08	-80.215	0.197	-79.975
15.1	-80.215	0.197	-79.961
15.12	-80.215	0.197	-79.943
15.14	-80.215	0.196	-79.923
15.16	-80.215	0.194	-79.899
15.18	-80.171	0.192	-79.872
15.2	-80.171	0.187	-79.842
15.22	-80.171	0.178	-79.809
15.24	-80.171	0.166	-79.773
15.26	-80.171	0.151	-79.733
15.28	-80.171	0.133	-79.691
15.3	-80.171	0.116	-79.645
15.32	-80.171	0.101	-79.596
15.34	-80.084	0.09	-79.544
15.36	-80.04	0.08	-79.489
15.38	-79.996	0.071	-79.431
15.4	-79.952	0.063	-79.369
15.42	-79.908	0.055	-79.305
15.44	-79.82	0.05	-79.237
15.46	-79.776	0.047	-79.166
15.48	-79.776	0.046	-79.092
15.5	-79.732	0.045	-79.015
15.52	-79.644	0.043	-78.935
15.54	-79.512	0.04	-78.852
15.56	-79.468	0.036	-78.765
15.58	-79.38	0.033	-78.676
15.6	-79.293	0.031	-78.583
15.62	-79.249	0.029	-78.487
15.64	-79.029	0.029	-78.388
15.66	-78.897	0.028	-78.286
15.68	-78.853	0.028	-78.181
15.7	-78.853	0.029	-78.073
15.72	-78.633	0.033	-77.962
15.74	-78.546	0.036	-77.848
15.76	-78.502	0.038	-77.731
15.78	-78.37	0.041	-77.61
15.8	-78.194	0.044	-77.487
15.82	-78.106	0.046	-77.36
15.84	-77.886	0.049	-77.231
15.86	-77.842	0.048	-77.098
15.88	-77.798	0.047	-76.962
15.9	-77.623	0.046	-76.823
15.92	-77.579	0.044	-76.682
15.94	-77.491	0.043	-76.537
15.96	-77.227	0.042	-76.389
15.98	-77.183	0.039	-76.238
16	-76.963	0.039	-76.085
16.02	-76.92	0.04	-75.928
16.04	-76.7	0.044	-75.768
16.06	-76.568	0.049	-75.605
16.08	-76.392	0.054	-75.439
16.1	-76.348	0.056	-75.27
16.12	-76.129	0.059	-75.099
16.14	-75.865	0.061	-74.924
16.16	-75.777	0.058	-74.746
16.18	-75.645	0.054	-74.566
16.2	-75.338	0.051	-74.382
16.22	-75.206	0.046	-74.196
16.24	-75.074	0.043	-74.006
16.26	-74.81	0.045	-73.814
16.28	-74.634	0.049	-73.619
16.3	-74.415	0.056	-73.42
16.32	-74.371	0.06	-73.219
16.34	-74.151	0.062	-73.015
16.36	-73.975	0.06	-72.808
16.38	-73.843	0.055	-72.599
16.4	-73.58	0.053	-72.386
16.42	-73.36	0.052	-72.171
16.44	-73.272	0.053	-71.952
16.46	-72.921	0.057	-71.731
16.48	-72.789	0.061	-71.507
16.5	-72.613	0.065	-71.281
16.52	-72.393	0.07	-71.051
16.54	-72.042	0.077	-70.819
16.56	-71.91	0.081	-70.583
16.58	-71.646	0.085	-70.345
16.6	-71.558	0.085	-70.105
16.62	-71.119	0.085	-69.861
16.64	-70.987	0.081	-69.615
16.66	-70.723	0.077	-69.366
16.68	-70.328	0.075	-69.114
16.7	-70.108	0.073	-68.859
16.72	-69.932	0.074	-68.602
16.74	-69.669	0.078	-68.342
16.76	-69.361	0.082	-68.08
16.78	-69.141	0.084	-67.814
16.8	-68.921	0.086	-67.546
16.82	-68.702	0.088	-67.276
16.84	-68.394	0.09	-67.002
16.86	-68.174	0.088	-66.726
16.88	-67.955	0.085	-66.448
16.9	-67.735	0.081	-66.166
16.92	-67.383	0.079	-65.883
16.94	-67.252	0.077	-65.596
16.96	-66.9	0.08	-65.307
16.98	-66.636	0.083	-65.016
17	-66.241	0.089	-64.721
17.02	-65.977	0.091	-64.425
17.04	-65.713	0.092	-64.125
17.06	-65.318	0.092	-63.824
17.08	-65.054	0.092	-63.519
17.1	-64.791	0.094	-63.212
17.12	-64.439	0.097	-62.903
17.14	-64.219	0.099	-62.591
17.16	-63.868	0.099	-62.277
17.18	-63.604	0.097	-61.96
17.2	-63.209	0.097	-61.641
17.22	-62.989	0.094	-61.319
17.24	-62.593	0.094	-60.995
17.26	-62.374	0.092	-60.669
17.28	-61.934	0.096	-60.34
17.3	-61.758	0.1	-60.009
17.32	-61.407	0.107	-59.675
17.34	-61.143	0.113	-59.339
17.36	-60.704	0.118	-59.001
17.38	-60.352	0.12	-58.66
17.4	-60.088	0.119	-58.317
17.42	-59.737	0.118	-57.972
17.44	-59.429	0.116	-57.625
17.46	-59.034	0.115	-57.275
17.48	-58.726	0.114	-56.923
17.5	-58.375	0.115	-56.569
17.52	-58.023	0.117	-56.212
17.54	-57.671	0.119	-55.853
17.56	-57.364	0.12	-55.492
17.58	-57.012	0.121	-55.129
17.6	-56.617	0.123	-54.764
17.62	-56.221	0.124	-54.396
17.64	-55.914	0.124	-54.027
17.66	-55.518	0.126	-53.655
17.68	-55.211	0.127	-53.281
17.7	-54.771	0.128	-52.905
17.72	-54.463	0.125	-52.527
17.74	-54.112	0.122	-52.147
17.76	-53.76	0.118	-51.764
17.78	-53.365	0.117	-51.38
17.8	-53.013	0.118	-50.994
17.82	-52.618	0.122	-50.606
17.84	-52.178	0.128	-50.215
17.86	-51.827	0.133	-49.823
17.88	-51.431	0.136	-49.429
17.9	-50.992	0.138	-49.033
17.92	-50.596	0.138	-48.634
17.94	-50.201	0.138	-48.234
17.96	-49.717	0.139	-47.832
17.98	-49.366	0.138	-47.429
18	-49.014	0.138	-47.023
18.02	-48.575	0.138	-46.615
18.04	-48.223	0.139	-46.206
18.06	-47.872	0.14	-45.795
18.08	-47.388	0.139	-45.382
18.1	-46.993	0.135	-44.967
18.12	-46.641	0.131	-44.55
18.14	-46.158	0.131	-44.132
18.16	-45.806	0.134	-43.712
18.18	-45.411	0.14	-43.29
18.2	-45.059	0.146	-42.866
18.22	-44.62	0.152	-42.441
18.24	-44.136	0.156	-42.014
18.26	-43.741	0.159	-41.585
18.28	-43.389	0.16	-41.155
18.3	-42.906	0.158	-40.723
18.32	-42.466	0.153	-40.29
18.34	-41.983	0.146	-39.855
18.36	-41.544	0.14	-39.418
18.38	-41.104	0.137	-38.98
18.4	-40.709	0.137	-38.54
18.42	-40.225	0.14	-38.099
18.44	-39.83	0.145	-37.656
18.46	-39.346	0.152	-37.212
18.48	-38.907	0.156	-36.766
18.5	-38.511	0.158	-36.319
18.52	-38.16	0.157	-35.871
18.54	-37.676	0.157	-35.421
18.56	-37.237	0.156	-34.969
18.58	-36.797	0.154	-34.516
18.6	-36.402	0.15	-34.062
18.62	-35.875	0.148	-33.607
18.64	-35.435	0.147	-33.15
18.66	-34.908	0.148	-32.692
18.68	-34.556	0.151	-32.233
18.7	-34.073	0.156	-31.772
18.72	-33.589	0.162	-31.31
18.74	-33.194	0.166	-30.847
18.76	-32.754	0.167	-30.382
18.78	-32.227	0.162	-29.917
18.8	-31.788	0.152	-29.45
18.82	-31.26	0.142	-28.982
18.84	-30.821	0.135	-28.513
18.86	-30.381	0.132	-28.043
18.88	-29.898	0.134	-27.571
18.9	-29.415	0.139	-27.099
18.92	-28.975	0.144	-26.626
18.94	-28.536	0.147	-26.151
18.96	-28.052	0.146	-25.675
18.98	-27.525	0.142	-25.199
19	-27.129	0.137	-24.721
19.02	-26.646	0.135	-24.243
19.04	-26.207	0.135	-23.763
19.06	-25.635	0.138	-23.283
19.08	-25.24	0.139	-22.802
19.1	-24.713	0.141	-22.319
19.12	-24.273	0.14	-21.836
19.14	-23.746	0.14	-21.352
19.16	-23.262	0.139	-20.867
19.18	-22.823	0.138	-20.382
19.2	-22.296	0.136	-19.895
19.22	-21.812	0.135	-19.408
19.24	-21.329	0.134	-18.92
19.26	-20.845	0.135	-18.431
19.28	-20.274	0.141	-17.942
19.3	-19.879	0.149	-17.451
19.32	-19.307	0.157	-16.961
19.34	-18.912	0.159	-16.469
19.36	-18.428	0.156	-15.977
19.38	-17.945	0.148	-15.484
19.4	-17.549	0.141	-14.991
19.42	-17.022	0.138	-14.496
19.44	-16.407	0.138	-14.002
19.46	-16.011	0.139	-13.507
19.48	-15.484	0.14	-13.011
19.5	-15.045	0.14	-12.515
19.52	-14.429	0.142	-12.018
19.54	-13.858	0.144	-11.521
19.56	-13.419	0.144	-11.023
19.58	-13.023	0.14	-10.525
19.6	-12.496	0.133	-10.027
19.62	-12.056	0.13	-9.528
19.64	-11.485	0.131	-9.029
19.66	-10.958	0.136	-8.529
19.68	-10.562	0.139	-8.029
19.7	-9.947	0.139	-7.529
19.72	-9.376	0.139	-7.028
19.74	-8.98	0.14	-6.527
19.76	-8.409	0.142	-6.026
19.78	-8.101	0.14	-5.525
19.8	-7.442	0.135	-5.023
19.82	-6.959	0.129	-4.521
19.84	-6.519	0.125	-4.02
19.86	-5.904	0.125	-3.517
19.88	-5.596	0.126	-3.015
19.9	-5.025	0.127	-2.513
19.92	-4.542	0.129	-2.01
19.94	-4.102	0.13	-1.508
19.96	-3.619	0.13	-1.005
19.98	-3.004	0.127	-0.503
20	-2.476	0.123	0
20.02	-1.993	0.121	0.503
20.04	-1.465	0.122	1.005
20.06	-0.982	0.123	1.508
20.08	-0.499	0.123	2.01
20.1	0.073	0.122	2.042
20.12	0.512	0.12	2.45
20.14	1.039	0.119	2.858
20.16	1.479	0.119	3.266
20.18	2.138	0.12	3.674
20.2	2.49	0.124	4.081
20.22	2.929	0.127	4.489
20.24	3.193	0.128	4.896
20.26	3.632	0.123	5.303
20.28	3.94	0.115	5.71
20.3	4.291	0.106	6.117
20.32	4.555	0.101	6.524
20.34	4.951	0.098	6.93
20.36	5.214	0.096	7.336
20.38	5.742	0.092	7.741
20.4	6.137	0.088	8.147
20.42	6.401	0.085	8.552
20.44	6.84	0.084	8.956
20.46	7.192	0.087	9.361
20.48	7.499	0.091	9.765
20.5	8.115	0.094	10.168
20.52	8.598	0.095	10.571
20.54	8.906	0.093	10.974
20.56	9.301	0.09	11.376
20.58	9.872	0.091	11.778
20.6	10.18	0.096	12.18
20.62	10.795	0.102	12.581
20.64	11.147	0.107	12.981
20.66	11.498	0.105	13.381
20.68	11.894	0.096	13.78
20.7	12.202	0.085	14.179
20.72	12.861	0.077	14.578
20.74	13.168	0.077	14.975
20.76	13.476	0.082	15.372
20.78	13.828	0.084	15.769
20.8	14.179	0.083	16.165
20.82	14.706	0.079	16.56
20.84	15.058	0.075	16.955
20.86	15.366	0.072	17.349
20.88	15.849	0.069	17.742
20.9	16.245	0.066	18.134
20.92	16.596	0.064	18.526
20.94	17.036	0.063	18.917
20.96	17.387	0.062	19.308
20.98	17.958	0.06	19.697
21	18.354	0.059	20.086
21.02	18.618	0.061	20.474
21.04	19.101	0.065	20.861
21.06	19.453	0.068	21.248
21.08	19.892	0.067	21.633
21.1	20.287	0.064	22.018
21.12	20.551	0.061	22.402
21.14	20.947	0.057	22.785
21.16	21.298	0.053	23.167
21.18	21.738	0.05	23.548
21.2	22.045	0.048	23.928
21.22	22.397	0.049	24.307
21.24	22.968	0.05	24.686
21.26	23.276	0.052	25.063
21.28	23.496	0.054	25.439
21.3	24.023	0.056	25.815
21.32	24.462	0.058	26.189
21.34	24.858	0.058	26.562
21.36	25.165	0.055	26.934
21.38	25.429	0.05	27.306
21.4	25.956	0.045	27.676
21.42	26.396	0.042	28.045
21.44	26.704	0.042	28.413
21.46	27.099	0.04	28.779
21.48	27.407	0.034	29.145
21.5	27.89	0.027	29.509
21.52	28.11	0.025	29.873
21.54	28.549	0.027	30.235
21.56	28.989	0.03	30.596
21.58	29.296	0.031	30.955
21.6	29.692	0.029	31.314
21.62	29.999	0.025	31.671
21.64	30.263	0.024	32.027
21.66	30.746	0.025	32.382
21.68	31.01	0.028	32.736
21.7	31.45	0.027	33.088
21.72	31.889	0.024	33.439
21.74	32.197	0.02	33.788
21.76	32.46	0.018	34.136
21.78	32.812	0.018	34.483
21.8	33.207	0.018	34.829
21.82	33.471	0.017	35.173
21.84	33.911	0.012	35.516
21.86	33.998	0.007	35.857
21.88	34.702	0	36.197
21.9	34.965	-0.001	36.535
21.92	35.361	0	36.872
21.94	35.844	0	37.208
21.96	36.284	-0.004	37.542
21.98	36.328	-0.006	37.875
22	36.767	-0.008	38.206
22.02	37.162	-0.007	38.536
22.04	37.602	-0.005	38.864
22.06	37.778	-0.002	39.19
22.08	38.041	-0.002	39.515
22.1	38.481	-0.005	39.839
22.12	38.788	-0.01	40.161
22.14	38.964	-0.014	40.481
22.16	39.36	-0.019	40.8
22.18	39.711	-0.023	41.117
22.2	40.283	-0.027	41.433
22.22	40.371	-0.025	41.746
22.24	40.59	-0.021	42.059
22.26	40.898	-0.017	42.369
22.28	41.293	-0.015	42.678
22.3	41.293	-0.016	42.985
22.32	41.733	-0.022	43.291
22.34	42.04	-0.029	43.595
22.36	42.392	-0.035	43.897
22.38	42.875	-0.04	44.197
22.4	43.139	-0.041	44.496
22.42	43.579	-0.042	44.792
22.44	43.93	-0.041	45.087
22.46	44.194	-0.039	45.381
22.48	44.326	-0.034	45.672
22.5	44.765	-0.033	45.962
22.52	45.292	-0.034	46.25
22.54	45.336	-0.034	46.536
22.56	45.512	-0.036	46.82
22.58	45.908	-0.04	47.102
22.6	46.171	-0.041	47.383
22.62	46.347	-0.041	47.662
22.64	46.874	-0.045	47.938
22.66	46.962	-0.047	48.213
22.68	47.182	-0.052	48.486
22.7	47.446	-0.056	48.757
22.72	47.797	-0.058	49.026
22.74	48.193	-0.059	49.294
22.76	48.632	-0.06	49.559
22.78	48.764	-0.058	49.822
22.8	49.028	-0.059	50.083
22.82	49.116	-0.057	50.343
22.84	49.599	-0.058	50.6
22.86	49.863	-0.058	50.855
22.88	50.126	-0.059	51.109
22.9	50.258	-0.059	51.36
22.92	50.478	-0.061	51.609
22.94	50.961	-0.064	51.857
22.96	51.049	-0.062	52.102
22.98	51.445	-0.062	52.345
23	51.621	-0.061	52.586
23.02	51.708	-0.062	52.825
23.04	51.928	-0.066	53.062
23.06	52.368	-0.071	53.297
23.08	52.587	-0.07	53.53
23.1	52.675	-0.066	53.76
23.12	53.115	-0.066	53.989
23.14	53.246	-0.064	54.215
23.16	53.598	-0.064	54.439
23.18	53.774	-0.065	54.661
23.2	53.994	-0.068	54.881
23.22	54.257	-0.074	55.099
23.24	54.433	-0.08	55.315
23.26	54.653	-0.085	55.528
23.28	54.785	-0.086	55.739
23.3	55.136	-0.088	55.948
23.32	55.4	-0.087	56.155
23.34	55.444	-0.084	56.36
23.36	55.883	-0.087	56.562
23.38	55.927	-0.089	56.762
23.4	56.103	-0.093	56.96
23.42	56.191	-0.095	57.156
23.44	56.411	-0.096	57.349
23.46	56.718	-0.095	57.54
23.48	56.938	-0.094	57.729
23.5	57.202	-0.093	57.915
23.52	57.377	-0.093	58.1
23.54	57.465	-0.093	58.282
23.56	57.817	-0.096	58.461
23.58	58.124	-0.097	58.639
23.6	58.212	-0.095	58.814
23.62	58.3	-0.09	58.986
23.64	58.476	-0.083	59.157
23.66	58.564	-0.076	59.325
23.68	58.915	-0.074	59.491
23.7	59.091	-0.072	59.654
23.72	59.355	-0.075	59.815
23.74	59.531	-0.079	59.974
23.76	59.662	-0.083	60.13
23.78	59.706	-0.087	60.284
23.8	59.882	-0.091	60.435
23.82	60.014	-0.093	60.585
23.84	60.058	-0.095	60.731
23.86	60.102	-0.097	60.876
23.88	60.497	-0.103	61.018
23.9	60.629	-0.106	61.157
23.92	60.629	-0.11	61.294
23.94	61.069	-0.119	61.429
23.96	61.157	-0.125	61.561
23.98	61.201	-0.128	61.691
24	61.376	-0.128	61.819
24.02	61.64	-0.127	61.944
24.04	61.64	-0.124	62.066
24.06	61.816	-0.123	62.186
24.08	61.992	-0.125	62.304
24.1	62.167	-0.128	62.419
24.12	62.167	-0.129	62.532
24.14	62.211	-0.13	62.642
24.16	62.431	-0.132	62.75
24.18	62.519	-0.131	62.855
24.2	62.519	-0.129	62.958
24.22	62.651	-0.128	63.058
24.24	62.695	-0.125	63.156
24.26	62.871	-0.123	63.251
24.28	63.002	-0.12	63.344
24.3	63.222	-0.118	63.435
24.32	63.222	-0.115	63.522
24.34	63.31	-0.114	63.608
24.36	63.618	-0.117	63.691
24.38	63.618	-0.118	63.771
24.4	63.749	-0.12	63.849
24.42	63.749	-0.119	63.924
24.44	63.925	-0.119	63.997
24.46	63.969	-0.119	64.067
24.48	64.013	-0.12	64.135
24.5	64.013	-0.121	64.2
24.52	64.057	-0.121	64.262
24.54	64.101	-0.122	64.322
24.56	64.233	-0.124	64.38
24.58	64.233	-0.123	64.435
24.6	64.453	-0.125	64.487
24.62	64.54	-0.124	64.537
24.64	64.54	-0.125	64.585
24.66	64.672	-0.127	64.63
24.68	64.672	-0.128	64.672
24.7	64.672	-0.128	64.712
24.72	64.672	-0.127	64.749
24.74	64.716	-0.126	64.783
24.76	64.892	-0.128	64.815
24.78	64.892	-0.129	64.845
24.8	64.892	-0.131	64.872
24.82	64.936	-0.132	64.896
24.84	64.936	-0.132	64.918
24.86	65.024	-0.131	64.937
24.88	65.024	-0.13	64.954
24.9	65.024	-0.131	64.968
24.92	65.024	-0.132	64.979
24.94	65.112	-0.134	64.988
24.96	65.156	-0.134	64.995
24.98	65.156	-0.134	64.999
25	65.2	-0.135	65
25.02	65.244	-0.136	64.999
25.04	65.2	-0.136	64.995
25.06	65.2	-0.133	64.988
25.08	65.2	-0.129	64.979
25.1	65.2	-0.123	64.968
25.12	65.156	-0.116	64.954
25.14	65.156	-0.108	64.937
25.16	65.156	-0.098	64.918
25.18	65.112	-0.087	64.896
25.2	65.112	-0.077	64.872
25.22	65.112	-0.066	64.845
25.24	65.112	-0.056	64.815
25.26	65.112	-0.047	64.783
25.28	65.068	-0.038	64.749
25.3	65.024	-0.028	64.712
25.32	65.068	-0.02	64.672
25.34	65.024	-0.011	64.63
25.36	64.98	-0.001	64.585
25.38	65.024	0.008	64.537
25.4	64.936	0.018	64.487
25.42	64.892	0.027	64.435
25.44	64.848	0.035	64.38
25.46	64.848	0.04	64.322
25.48	64.716	0.046	64.262
25.5	64.628	0.051	64.2
25.52	64.496	0.056	64.135
25.54	64.496	0.058	64.067
25.56	64.496	0.059	63.997
25.58	64.453	0.06	63.924
25.6	64.365	0.063	63.849
25.62	64.365	0.065	63.771
25.64	64.321	0.067	63.691
25.66	64.145	0.07	63.608
25.68	64.057	0.072	63.522
25.7	63.969	0.073	63.435
25.72	63.881	0.073	63.344
25.74	63.749	0.073	63.251
25.76	63.705	0.072	63.156
25.78	63.618	0.072	63.058
25.8	63.618	0.072	62.958
25.82	63.486	0.073	62.855
25.84	63.398	0.073	62.75
25.86	63.222	0.075	62.642
25.88	63.178	0.075	62.532
25.9	63.046	0.077	62.419
25.92	62.958	0.079	62.304
25.94	62.958	0.078	62.186
25.96	62.783	0.078	62.066
25.98	62.739	0.076	61.944
26	62.739	0.074	61.819
26.02	62.519	0.074	61.691
26.04	62.431	0.073	61.561
26.06	62.387	0.071	61.429
26.08	62.299	0.069	61.294
26.1	62.036	0.067	61.157
26.12	61.948	0.063	61.018
26.14	61.816	0.061	60.876
26.16	61.552	0.062	60.731
26.18	61.42	0.062	60.585
26.2	61.025	0.064	60.435
26.22	60.981	0.062	60.284
26.24	60.981	0.06	60.13
26.26	60.717	0.061	59.974
26.28	60.541	0.063	59.815
26.3	60.497	0.064	59.654
26.32	60.41	0.066	59.491
26.34	60.322	0.069	59.325
26.36	60.278	0.073	59.157
26.38	59.97	0.079	58.986
26.4	59.838	0.085	58.814
26.42	59.619	0.09	58.639
26.44	59.575	0.094	58.461
26.46	59.355	0.1	58.282
26.48	59.135	0.104	58.1
26.5	59.091	0.106	57.915
26.52	58.828	0.11	57.729
26.54	58.608	0.113	57.54
26.56	58.432	0.117	57.349
26.58	58.388	0.12	57.156
26.6	58.124	0.123	56.96
26.62	57.861	0.123	56.762
26.64	57.597	0.119	56.562
26.66	57.465	0.112	56.36
26.68	57.202	0.105	56.155
26.7	57.07	0.101	55.948
26.72	56.762	0.1	55.739
26.74	56.674	0.099	55.528
26.76	56.323	0.101	55.315
26.78	56.147	0.102	55.099
26.8	56.103	0.102	54.881
26.82	55.839	0.104	54.661
26.84	55.663	0.103	54.439
26.86	55.444	0.103	54.215
26.88	55.224	0.104	53.989
26.9	55.092	0.107	53.76
26.92	54.741	0.112	53.53
26.94	54.609	0.114	53.297
26.96	54.257	0.115	53.062
26.98	54.169	0.114	52.825
27	53.862	0.114	52.586
27.02	53.554	0.115	52.345
27.04	53.378	0.116	52.102
27.06	53.027	0.119	51.857
27.08	52.895	0.121	51.609
27.1	52.631	0.124	51.36
27.12	52.499	0.126	51.109
27.14	52.148	0.128	50.855
27.16	52.104	0.128	50.6
27.18	51.664	0.13	50.343
27.2	51.489	0.129	50.083
27.22	51.401	0.127	49.822
27.24	51.049	0.129	49.559
27.26	50.742	0.131	49.294
27.28	50.522	0.133	49.026
27.3	50.214	0.135	48.757
27.32	49.907	0.136	48.486
27.34	49.555	0.137	48.213
27.36	49.16	0.137	47.938
27.38	49.072	0.135	47.662
27.4	48.852	0.133	47.383
27.42	48.544	0.132	47.102
27.44	48.237	0.131	46.82
27.46	47.929	0.131	46.536
27.48	47.753	0.132	46.25
27.5	47.402	0.136	45.962
27.52	47.182	0.138	45.672
27.54	46.874	0.141	45.381
27.56	46.83	0.14	45.087
27.58	46.479	0.142	44.792
27.6	46.039	0.145	44.496
27.62	45.732	0.148	44.197
27.64	45.248	0.152	43.897
27.66	44.985	0.155	43.595
27.68	44.897	0.155	43.291
27.7	44.37	0.158	42.985
27.72	44.018	0.16	42.678
27.74	43.71	0.163	42.369
27.76	43.579	0.166	42.059
27.78	43.139	0.17	41.746
27.8	43.051	0.17	41.433
27.82	42.787	0.17	41.117
27.84	42.48	0.168	40.8
27.86	42.128	0.168	40.481
27.88	41.909	0.167	40.161
27.9	41.689	0.167	39.839
27.92	41.469	0.167	39.515
27.94	40.986	0.169	39.19
27.96	40.59	0.17	38.864
27.98	40.414	0.172	38.536
28	39.931	0.177	38.206
28.02	39.711	0.182	37.875
28.04	39.316	0.186	37.542
28.06	38.788	0.188	37.208
28.08	38.481	0.185	36.872
28.1	38.129	0.182	36.535
28.12	37.866	0.18	36.197
28.14	37.558	0.181	35.857
28.16	37.162	0.185	35.516
28.18	36.811	0.189	35.173
28.2	36.503	0.194	34.829
28.22	36.196	0.198	34.483
28.24	35.976	0.199	34.136
28.26	35.8	0.196	33.788
28.28	35.273	0.193	33.439
28.3	34.877	0.19	33.088
28.32	34.746	0.189	32.736
28.34	34.438	0.193	32.382
28.36	33.954	0.2	32.027
28.38	33.515	0.205	31.671
28.4	33.032	0.208	31.314
28.42	32.856	0.205	30.955
28.44	32.372	0.206	30.596
28.46	31.933	0.209	30.235
28.48	31.581	0.215	29.873
28.5	31.406	0.219	29.509
28.52	31.01	0.222	29.145
28.54	30.79	0.221	28.779
28.56	30.439	0.22	28.413
28.58	29.824	0.222	28.045
28.6	29.56	0.225	27.676
28.62	29.34	0.228	27.306
28.64	28.857	0.231	26.934
28.66	28.373	0.231	26.562
28.68	28.286	0.228	26.189
28.7	27.67	0.227	25.815
28.72	27.407	0.225	25.439
28.74	27.011	0.223	25.063
28.76	26.528	0.221	24.686
28.78	26.132	0.22	24.307
28.8	25.781	0.221	23.928
28.82	25.473	0.225	23.548
28.84	25.121	0.232	23.167
28.86	24.814	0.237	22.785
28.88	24.33	0.24	22.402
28.9	24.155	0.241	22.018
28.92	23.452	0.247	21.633
28.94	23.188	0.253	21.248
28.96	22.88	0.26	20.861
28.98	22.309	0.264	20.474
29	21.826	0.264	20.086
29.02	21.606	0.26	19.697
29.04	21.298	0.256	19.308
29.06	20.859	0.254	18.917
29.08	20.507	0.253	18.526
29.1	20.244	0.253	18.134
29.12	19.672	0.255	17.742
29.14	19.496	0.257	17.349
29.16	18.881	0.261	16.955
29.18	18.486	0.264	16.56
29.2	18.222	0.265	16.165
29.22	17.651	0.266	15.769
29.24	17.563	0.265	15.372
29.26	17.079	0.264	14.975
29.28	16.596	0.263	14.578
29.3	16.42	0.262	14.179
29.32	15.805	0.264	13.78
29.34	15.366	0.264	13.381
29.36	15.278	0.263	12.981
29.38	14.575	0.261	12.581
29.4	14.135	0.259	12.18
29.42	13.652	0.26	11.778
29.44	13.3	0.262	11.376
29.46	12.861	0.266	10.974
29.48	12.641	0.269	10.571
29.5	12.158	0.271	10.168
29.52	11.762	0.272	9.765
29.54	11.323	0.272	9.361
29.56	10.927	0.272	8.956
29.58	10.663	0.271	8.552
29.6	10.136	0.275	8.147
29.62	9.916	0.282	7.741
29.64	9.389	0.291	7.336
29.66	8.95	0.298	6.93
29.68	8.554	0.298	6.524
29.7	8.159	0.293	6.117
29.72	7.719	0.288	5.71
29.74	7.324	0.285	5.303
29.76	6.884	0.287	4.896
29.78	6.533	0.289	4.489
29.8	6.005	0.29	4.081
29.82	5.654	0.288	3.674
29.84	5.258	0.286	3.266
29.86	4.687	0.283	2.858
29.88	4.335	0.281	2.45
29.9	4.028	0.284	2.042
29.92	3.544	0.289	1.633
29.94	3.193	0.294	1.225
29.96	2.885	0.296	0.817
29.98	2.578	0.296	0.408
30	2.138	0.296	0
30.02	1.567	0.297	-0.408
30.04	1.259	0.298	-0.817
30.06	0.864	0.301	-1.225
30.08	0.424	0.303	-1.633
30.1	-0.015	0.306	-2.513
30.12	-0.367	0.308	-3.015
30.14	-0.762	0.308	-3.517
30.16	-1.202	0.307	-4.02
30.18	-1.641	0.307	-4.521
30.2	-2.081	0.308	-5.023
30.22	-2.652	0.311	-5.525
30.24	-3.179	0.312	-6.026
30.26	-3.795	0.313	-6.527
30.28	-4.41	0.315	-7.028
30.3	-4.849	0.317	-7.529
30.32	-5.333	0.318	-8.029
30.34	-6.168	0.318	-8.529
30.36	-6.695	0.316	-9.029
30.38	-7.134	0.313	-9.528
30.4	-7.925	0.309	-10.027
30.42	-8.365	0.307	-10.525
30.44	-8.936	0.308	-11.023
30.46	-9.463	0.31	-11.521
30.48	-9.947	0.313	-12.018
30.5	-10.298	0.318	-12.515
30.52	-10.782	0.323	-13.011
30.54	-11.265	0.326	-13.507
30.56	-11.617	0.328	-14.002
30.58	-12.144	0.327	-14.496
30.6	-12.54	0.326	-14.991
30.62	-13.023	0.324	-15.484
30.64	-13.375	0.323	-15.977
30.66	-13.946	0.319	-16.469
30.68	-14.517	0.315	-16.961
30.7	-15.045	0.313	-17.451
30.72	-15.396	0.314	-17.942
30.74	-15.967	0.318	-18.431
30.76	-16.539	0.324	-18.92
30.78	-17.066	0.329	-19.408
30.8	-17.549	0.332	-19.895
30.82	-18.033	0.332	-20.382
30.84	-18.604	0.33	-20.867
30.86	-19.131	0.326	-21.352
30.88	-19.571	0.319	-21.836
30.9	-20.054	0.312	-22.319
30.92	-20.67	0.31	-22.802
30.94	-21.065	0.315	-23.283
30.96	-21.592	0.32	-23.763
30.98	-22.032	0.324	-24.243
31	-22.515	0.323	-24.721
31.02	-22.955	0.32	-25.199
31.04	-23.438	0.319	-25.675
31.06	-23.878	0.321	-26.151
31.08	-24.361	0.325	-26.626
31.1	-24.844	0.329	-27.099
31.12	-25.284	0.329	-27.571
31.14	-25.767	0.326	-28.043
31.16	-26.382	0.322	-28.513
31.18	-26.822	0.32	-28.982
31.2	-27.261	0.32	-29.45
31.22	-27.745	0.321	-29.917
31.24	-28.228	0.319	-30.382
31.26	-28.712	0.315	-30.847
31.28	-29.239	0.311	-31.31
31.3	-29.678	0.31	-31.772
31.32	-30.118	0.315	-32.233
31.34	-30.601	0.321	-32.692
31.36	-31.129	0.323	-33.15
31.38	-31.524	0.32	-33.607
31.4	-32.007	0.314	-34.062
31.42	-32.447	0.308	-34.516
31.44	-32.842	0.305	-34.969
31.46	-33.414	0.304	-35.421
31.48	-33.853	0.305	-35.871
31.5	-34.293	0.307	-36.319
31.52	-34.644	0.312	-36.766
31.54	-35.128	0.316	-37.212
31.56	-35.611	0.318	-37.656
31.58	-36.05	0.318	-38.099
31.6	-36.534	0.316	-38.54
31.62	-36.929	0.315	-38.98
31.64	-37.413	0.315	-39.418
31.66	-37.896	0.315	-39.855
31.68	-38.292	0.315	-40.29
31.7	-38.863	0.312	-40.723
31.72	-39.258	0.312	-41.155
31.74	-39.654	0.311	-41.585
31.76	-40.181	0.309	-42.014
31.78	-40.577	0.309	-42.441
31.8	-40.928	0.308	-42.866
31.82	-41.412	0.305	-43.29
31.84	-41.895	0.302	-43.712
31.86	-42.291	0.299	-44.132
31.88	-42.642	0.297	-44.55
31.9	-43.17	0.294	-44.967
31.92	-43.521	0.293	-45.382
31.94	-44.004	0.291	-45.795
31.96	-44.356	0.291	-46.206
31.98	-44.839	0.292	-46.615
32	-45.279	0.295	-47.023
32.02	-45.674	0.298	-47.429
32.04	-46.07	0.301	-47.832
32.06	-46.509	0.301	-48.234
32.08	-46.993	0.298	-48.634
32.1	-47.3	0.293	-49.033
32.12	-47.784	0.286	-49.429
32.14	-48.179	0.281	-49.823
32.16	-48.487	0.28	-50.215
32.18	-48.926	0.279	-50.606
32.2	-49.322	0.281	-50.994
32.22	-49.673	0.284	-51.38
32.24	-50.113	0.284	-51.764
32.26	-50.508	0.283	-52.147
32.28	-50.86	0.282	-52.527
32.3	-51.299	0.279	-52.905
32.32	-51.739	0.278	-53.281
32.34	-52.003	0.28	-53.655
32.36	-52.442	0.283	-54.027
32.38	-52.794	0.288	-54.396
32.4	-53.233	0.288	-54.764
32.42	-53.585	0.285	-55.129
32.44	-53.936	0.277	-55.492
32.46	-54.376	0.267	-55.853
32.48	-54.683	0.26	-56.212
32.5	-55.079	0.255	-56.569
32.52	-55.386	0.254	-56.923
32.54	-55.738	0.257	-57.275
32.56	-56.089	0.262	-57.625
32.58	-56.573	0.265	-57.972
32.6	-56.88	0.267	-58.317
32.62	-57.232	0.265	-58.66
32.64	-57.584	0.261	-59.001
32.66	-57.847	0.259	-59.339
32.68	-58.243	0.258	-59.675
32.7	-58.55	0.26	-60.009
32.72	-58.946	0.263	-60.34
32.74	-59.21	0.266	-60.669
32.76	-59.517	0.267	-60.995
32.78	-59.913	0.265	-61.319
32.8	-60.22	0.264	-61.641
32.82	-60.616	0.262	-61.96
32.84	-61.011	0.258	-62.277
32.86	-61.319	0.255	-62.591
32.88	-61.583	0.253	-62.903
32.9	-61.978	0.251	-63.212
32.92	-62.374	0.25	-63.519
32.94	-62.549	0.25	-63.824
32.96	-62.945	0.247	-64.125
32.98	-63.34	0.243	-64.425
33	-63.56	0.24	-64.721
33.02	-63.868	0.237	-65.016
33.04	-64.131	0.238	-65.307
33.06	-64.395	0.239	-65.596
33.08	-64.791	0.239	-65.883
33.1	-65.054	0.239	-66.166
33.12	-65.274	0.237	-66.448
33.14	-65.626	0.233	-66.726
33.16	-65.801	0.233	-67.002
33.18	-66.197	0.232	-67.276
33.2	-66.461	0.233	-67.546
33.22	-66.68	0.235	-67.814
33.24	-67.032	0.235	-68.08
33.26	-67.252	0.233	-68.342
33.28	-67.471	0.23	-68.602
33.3	-67.911	0.224	-68.859
33.32	-68.13	0.22	-69.114
33.34	-68.438	0.217	-69.366
33.36	-68.746	0.215	-69.615
33.38	-68.878	0.216	-69.861
33.4	-69.185	0.217	-70.105
33.42	-69.493	0.219	-70.345
33.44	-69.713	0.222	-70.583
33.46	-69.888	0.224	-70.819
33.48	-70.108	0.224	-71.051
33.5	-70.416	0.223	-71.281
33.52	-70.723	0.221	-71.507
33.54	-70.899	0.22	-71.731
33.56	-71.251	0.215	-71.952
33.58	-71.382	0.214	-72.171
33.6	-71.558	0.214	-72.386
33.62	-71.866	0.215	-72.599
33.64	-71.998	0.218	-72.808
33.66	-72.261	0.22	-73.015
33.68	-72.525	0.221	-73.219
33.7	-72.657	0.223	-73.42
33.72	-72.964	0.223	-73.619
33.74	-73.052	0.223	-73.814
33.76	-73.36	0.219	-74.006
33.78	-73.58	0.214	-74.196
33.8	-73.624	0.21	-74.382
33.82	-73.975	0.204	-74.566
33.84	-74.019	0.201	-74.746
33.86	-74.239	0.199	-74.924
33.88	-74.459	0.198	-75.099
33.9	-74.678	0.2	-75.27
33.92	-74.898	0.203	-75.439
33.94	-75.118	0.205	-75.605
33.96	-75.206	0.208	-75.768
33.98	-75.425	0.206	-75.928
34	-75.689	0.202	-76.085
34.02	-75.777	0.197	-76.238
34.04	-75.909	0.193	-76.389
34.06	-75.997	0.191	-76.537
34.08	-76.216	0.19	-76.682
34.1	-76.348	0.191	-76.823
34.12	-76.48	0.194	-76.962
34.14	-76.656	0.197	-77.098
34.16	-76.832	0.201	-77.231
34.18	-76.876	0.204	-77.36
34.2	-77.139	0.203	-77.487
34.22	-77.271	0.201	-77.61
34.24	-77.359	0.196	-77.731
34.26	-77.535	0.191	-77.848
34.28	-77.667	0.187	-77.962
34.3	-77.711	0.186	-78.073
34.32	-77.93	0.185	-78.181
34.34	-78.106	0.186	-78.286
34.36	-78.194	0.19	-78.388
34.38	-78.282	0.195	-78.487
34.4	-78.326	0.199	-78.583
34.42	-78.414	0.201	-78.676
34.44	-78.589	0.199	-78.765
34.46	-78.677	0.197	-78.852
34.48	-78.721	0.194	-78.935
34.5	-78.941	0.187	-79.015
34.52	-78.941	0.183	-79.092
34.54	-79.029	0.177	-79.166
34.56	-79.073	0.172	-79.237
34.58	-79.205	0.17	-79.305
34.6	-79.293	0.171	-79.369
34.62	-79.424	0.173	-79.431
34.64	-79.424	0.177	-79.489
34.66	-79.468	0.181	-79.544
34.68	-79.6	0.184	-79.596
34.7	-79.644	0.188	-79.645
34.72	-79.688	0.192	-79.691
34.74	-79.776	0.195	-79.733
34.76	-79.776	0.199	-79.773
34.78	-79.82	0.201	-79.809
34.8	-79.864	0.202	-79.842
34.82	-79.908	0.203	-79.872
34.84	-79.908	0.204	-79.899
34.86	-79.952	0.205	-79.923
34.88	-80.04	0.204	-79.943
34.9	-80.128	0.202	-79.961
34.92	-80.215	0.201	-79.975
34.94	-80.215	0.201	-79.986
34.96	-80.215	0.202	-79.994
34.98	-80.215	0.202	-79.998
35	-80.215	0.2	-80
35.02	-80.215	0.196	-79.998
35.04	-80.171	0.19	-79.994
35.06	-80.171	0.181	-79.986
35.08	-80.215	0.173	-79.975
35.1	-80.171	0.167	-79.961
35.12	-80.171	0.164	-79.943
35.14	-80.171	0.163	-79.923
35.16	-80.215	0.162	-79.899
35.18	-80.215	0.16	-79.872
35.2	-80.215	0.157	-79.842
35.22	-80.215	0.151	-79.809
35.24	-80.215	0.144	-79.773
35.26	-80.171	0.136	-79.733
35.28	-80.128	0.125	-79.691
35.3	-80.084	0.112	-79.645
35.32	-80.084	0.097	-79.596
35.34	-80.04	0.083	-79.544
35.36	-80.04	0.072	-79.489
35.38	-79.996	0.064	-79.431
35.4	-79.996	0.058	-79.369
35.42	-79.908	0.055	-79.305
35.44	-79.82	0.052	-79.237
35.46	-79.688	0.05	-79.166
35.48	-79.688	0.046	-79.092
35.5	-79.688	0.042	-79.015
35.52	-79.556	0.041	-78.935
35.54	-79.556	0.038	-78.852
35.56	-79.468	0.037	-78.765
35.58	-79.337	0.035	-78.676
35.6	-79.249	0.031	-78.583
35.62	-79.249	0.026	-78.487
35.64	-79.205	0.02	-78.388
35.66	-78.985	0.018	-78.286
35.68	-78.985	0.015	-78.181
35.7	-78.853	0.016	-78.073
35.72	-78.765	0.019	-77.962
35.74	-78.589	0.023	-77.848
35.76	-78.414	0.026	-77.731
35.78	-78.37	0.028	-77.61
35.8	-78.194	0.032	-77.487
35.82	-78.194	0.036	-77.36
35.84	-78.018	0.042	-77.231
35.86	-77.93	0.046	-77.098
35.88	-77.798	0.048	-76.962
35.9	-77.535	0.047	-76.823
35.92	-77.491	0.043	-76.682
35.94	-77.403	0.041	-76.537
35.96	-77.227	0.042	-76.389
35.98	-77.051	0.043	-76.238
36	-77.007	0.043	-76.085
36.02	-76.788	0.047	-75.928
36.04	-76.744	0.049	-75.768
36.06	-76.744	0.05	-75.605
36.08	-76.48	0.052	-75.439
36.1	-76.26	0.052	-75.27
36.12	-76.041	0.051	-75.099
36.14	-75.953	0.048	-74.924
36.16	-75.777	0.046	-74.746
36.18	-75.557	0.044	-74.566
36.2	-75.469	0.043	-74.382
36.22	-75.25	0.045	-74.196
36.24	-74.986	0.048	-74.006
36.26	-74.898	0.051	-73.814
36.28	-74.678	0.054	-73.619
36.3	-74.415	0.057	-73.42
36.32	-74.327	0.058	-73.219
36.34	-74.107	0.06	-73.015
36.36	-73.975	0.06	-72.808
36.38	-73.712	0.06	-72.599
36.4	-73.536	0.057	-72.386
36.42	-73.228	0.056	-72.171
36.44	-73.184	0.054	-71.952
36.46	-72.921	0.056	-71.731
36.48	-72.701	0.061	-71.507
36.5	-72.437	0.067	-71.281
36.52	-72.393	0.069	-71.051
36.54	-72.086	0.073	-70.819
36.56	-71.954	0.075	-70.583
36.58	-71.602	0.078	-70.345
36.6	-71.426	0.078	-70.105
36.62	-71.251	0.075	-69.861
36.64	-71.031	0.073	-69.615
36.66	-70.635	0.072	-69.366
36.68	-70.504	0.07	-69.114
36.7	-70.196	0.072	-68.859
36.72	-70.02	0.076	-68.602
36.74	-69.625	0.082	-68.342
36.76	-69.449	0.086	-68.08
36.78	-69.229	0.088	-67.814
36.8	-68.921	0.088	-67.546
36.82	-68.746	0.088	-67.276
36.84	-68.438	0.089	-67.002
36.86	-68.13	0.09	-66.726
36.88	-67.955	0.089	-66.448
36.9	-67.647	0.086	-66.166
36.92	-67.383	0.082	-65.883
36.94	-67.12	0.079	-65.596
36.96	-66.724	0.079	-65.307
36.98	-66.373	0.082	-65.016
37	-66.153	0.086	-64.721
37.02	-65.933	0.09	-64.425
37.04	-65.67	0.093	-64.125
37.06	-65.274	0.095	-63.824
37.08	-65.098	0.093	-63.519
37.1	-64.879	0.092	-63.212
37.12	-64.527	0.093	-62.903
37.14	-64.263	0.094	-62.591
37.16	-63.956	0.096	-62.277
37.18	-63.648	0.098	-61.96
37.2	-63.384	0.1	-61.641
37.22	-62.945	0.101	-61.319
37.24	-62.637	0.1	-60.995
37.26	-62.33	0.098	-60.669
37.28	-62.066	0.099	-60.34
37.3	-61.671	0.103	-60.009
37.32	-61.363	0.108	-59.675
37.34	-60.967	0.113	-59.339
37.36	-60.66	0.114	-59.001
37.38	-60.352	0.113	-58.66
37.4	-60.045	0.111	-58.317
37.42	-59.693	0.111	-57.972
37.44	-59.429	0.11	-57.625
37.46	-58.946	0.112	-57.275
37.48	-58.682	0.114	-56.923
37.5	-58.331	0.117	-56.569
37.52	-58.067	0.121	-56.212
37.54	-57.715	0.125	-55.853
37.56	-57.232	0.129	-55.492
37.58	-56.968	0.128	-55.129
37.6	-56.705	0.122	-54.764
37.62	-56.221	0.118	-54.396
37.64	-55.87	0.115	-54.027
37.66	-55.562	0.116	-53.655
37.68	-55.167	0.123	-53.281
37.7	-54.771	0.129	-52.905
37.72	-54.42	0.13	-52.527
37.74	-54.112	0.125	-52.147
37.76	-53.716	0.12	-51.764
37.78	-53.277	0.117	-51.38
37.8	-52.969	0.118	-50.994
37.82	-52.53	0.123	-50.606
37.84	-52.178	0.13	-50.215
37.86	-51.783	0.138	-49.823
37.88	-51.475	0.143	-49.429
37.9	-51.036	0.147	-49.033
37.92	-50.684	0.146	-48.634
37.94	-50.333	0.142	-48.234
37.96	-49.849	0.139	-47.832
37.98	-49.454	0.137	-47.429
38	-49.014	0.139	-47.023
38.02	-48.619	0.142	-46.615
38.04	-48.267	0.143	-46.206
38.06	-47.784	0.142	-45.795
38.08	-47.476	0.136	-45.382
38.1	-46.949	0.132	-44.967
38.12	-46.597	0.128	-44.55
38.14	-46.246	0.128	-44.132
38.16	-45.85	0.133	-43.712
38.18	-45.411	0.141	-43.29
38.2	-45.015	0.149	-42.866
38.22	-44.576	0.157	-42.441
38.24	-44.18	0.162	-42.014
38.26	-43.697	0.163	-41.585
38.28	-43.345	0.16	-41.155
38.3	-42.862	0.155	-40.723
38.32	-42.422	0.147	-40.29
38.34	-41.983	0.141	-39.855
38.36	-41.544	0.139	-39.418
38.38	-41.148	0.141	-38.98
38.4	-40.753	0.143	-38.54
38.42	-40.181	0.148	-38.099
38.44	-39.742	0.15	-37.656
38.46	-39.434	0.151	-37.212
38.48	-38.951	0.153	-36.766
38.5	-38.511	0.154	-36.319
38.52	-38.116	0.155	-35.871
38.54	-37.632	0.157	-35.421
38.56	-37.193	0.158	-34.969
38.58	-36.754	0.158	-34.516
38.6	-36.314	0.158	-34.062
38.62	-35.919	0.156	-33.607
38.64	-35.479	0.151	-33.15
38.66	-34.952	0.146	-32.692
38.68	-34.556	0.144	-32.233
38.7	-34.073	0.146	-31.772
38.72	-33.633	0.153	-31.31
38.74	-33.15	0.161	-30.847
38.76	-32.667	0.164	-30.382
38.78	-32.183	0.162	-29.917
38.8	-31.744	0.155	-29.45
38.82	-31.304	0.147	-28.982
38.84	-30.865	0.141	-28.513
38.86	-30.381	0.138	-28.043
38.88	-29.854	0.138	-27.571
38.9	-29.459	0.139	-27.099
38.92	-28.887	0.141	-26.626
38.94	-28.492	0.142	-26.151
38.96	-28.052	0.14	-25.675
38.98	-27.525	0.137	-25.199
39	-27.129	0.133	-24.721
39.02	-26.602	0.134	-24.243
39.04	-26.207	0.136	-23.763
39.06	-25.723	0.141	-23.283
39.08	-25.24	0.143	-22.802
39.1	-24.669	0.142	-22.319
39.12	-24.141	0.139	-21.836
39.14	-23.746	0.134	-21.352
39.16	-23.306	0.133	-20.867
39.18	-22.823	0.136	-20.382
39.2	-22.339	0.139	-19.895
39.22	-21.856	0.141	-19.408
39.24	-21.285	0.141	-18.92
39.26	-20.845	0.143	-18.431
39.28	-20.45	0.147	-17.942
39.3	-19.922	0.153	-17.451
39.32	-19.395	0.157	-16.961
39.34	-18.912	0.156	-16.469
39.36	-18.34	0.151	-15.977
39.38	-17.901	0.143	-15.484
39.4	-17.462	0.137	-14.991
39.42	-16.89	0.138	-14.496
39.44	-16.407	0.143	-14.002
39.46	-15.967	0.149	-13.507
39.48	-15.352	0.152	-13.011
39.5	-14.869	0.152	-12.515
39.52	-14.429	0.15	-12.018
39.54	-13.99	0.147	-11.521
39.56	-13.506	0.142	-11.023
39.58	-13.023	0.135	-10.525
39.6	-12.54	0.13	-10.027
39.62	-11.924	0.127	-9.528
39.64	-11.529	0.128	-9.029
39.66	-11.089	0.133	-8.529
39.68	-10.562	0.139	-8.029
39.7	-10.035	0.145	-7.529
39.72	-9.551	0.147	-7.028
39.74	-9.068	0.147	-6.527
39.76	-8.629	0.144	-6.026
39.78	-7.969	0.141	-5.525
39.8	-7.442	0.136	-5.023
39.82	-6.959	0.132	-4.521
39.84	-6.475	0.129	-4.02
39.86	-5.904	0.128	-3.517
39.88	-5.333	0.129	-3.015
39.9	-4.937	0.129	-2.513
39.92	-4.41	0.127	-2.01
39.94	-3.882	0.125	-1.508
39.96	-3.487	0.124	-1.005
[truncated: 7,997 more rows]
