# Supplementary material for: Interactive Compliance Control of a Wrist Rehabilitation Device (WReD) with Enhanced Training Safety
Source: J Healthc Eng. 2019 Feb 18;2019:6537848. doi: 10.1155/2019/6537848 (PMC6409001; doi:10.1155/2019/6537848)
Supplement: Supplementary Materials — The original data of Experiment 1 to Experiment 4 are included. The data file of each experiment contains four columns named Time (second), Desired Angle (degree), Interaction Torque (Nm), and Measured Angle (degree). Figures 4–7 were derived from the original data of Experiment 1 to Experiment 4 by using MATLAB. Below are the descriptions of the four experiments: Experiment 1: the trajectory tracking responses with zero load. Experiment 2: the trajectory tracking responses with passive training. Experiment 3: the trajectory tracking responses with K = 0.8. Experiment 4: the trajectory tracking responses with K = 1.6. [file 6537848.f1.zip › 6537848.f1/Experiment 2.xls]

## Sheet: Alldata
Time	Desired	Interaction Torque	Measured
0	0.248	0.544	0
0.02	0.248	0.536	0.408
0.04	0.204	0.503	0.817
0.06	0.204	0.419	1.225
0.08	0.248	0.278	1.633
0.1	0.248	0.11	2.042
0.12	0.292	-0.036	2.45
0.14	0.38	-0.133	2.858
0.16	0.556	-0.191	3.266
0.18	0.864	-0.234	3.674
0.2	1.259	-0.271	4.081
0.22	1.435	-0.298	4.489
0.24	2.138	-0.316	4.896
0.26	2.358	-0.332	5.303
0.28	3.061	-0.358	5.71
0.3	3.764	-0.392	6.117
0.32	4.335	-0.426	6.524
0.34	4.775	-0.455	6.93
0.36	5.258	-0.477	7.336
0.38	5.873	-0.495	7.741
0.4	6.664	-0.514	8.147
0.42	7.06	-0.535	8.552
0.44	7.499	-0.556	8.956
0.46	7.807	-0.575	9.361
0.48	8.334	-0.593	9.765
0.5	8.642	-0.611	10.168
0.52	8.95	-0.628	10.571
0.54	9.257	-0.645	10.974
0.56	9.609	-0.662	11.376
0.58	9.653	-0.679	11.778
0.6	10.224	-0.698	12.18
0.62	10.663	-0.717	12.581
0.64	10.839	-0.733	12.981
0.66	11.279	-0.748	13.381
0.68	11.586	-0.761	13.78
0.7	12.07	-0.771	14.179
0.72	12.465	-0.779	14.578
0.74	12.817	-0.788	14.975
0.76	13.168	-0.798	15.372
0.78	13.784	-0.809	15.769
0.8	14.311	-0.82	16.165
0.82	14.662	-0.829	16.56
0.84	14.882	-0.838	16.955
0.86	15.366	-0.85	17.349
0.88	15.937	-0.867	17.742
0.9	16.201	-0.885	18.134
0.92	16.728	-0.905	18.526
0.94	17.079	-0.924	18.917
0.96	17.519	-0.943	19.308
0.98	17.958	-0.962	19.697
1	18.354	-0.984	20.086
1.02	18.574	-1.007	20.474
1.04	18.969	-1.033	20.861
1.06	19.54	-1.059	21.248
1.08	19.804	-1.082	21.633
1.1	20.244	-1.101	22.018
1.12	20.639	-1.116	22.402
1.14	20.991	-1.13	22.785
1.16	21.342	-1.145	23.167
1.18	21.606	-1.159	23.548
1.2	22.221	-1.175	23.928
1.22	22.441	-1.189	24.307
1.24	22.924	-1.205	24.686
1.26	23.188	-1.218	25.063
1.28	23.627	-1.23	25.439
1.3	23.979	-1.241	25.815
1.32	24.33	-1.254	26.189
1.34	24.814	-1.273	26.562
1.36	25.209	-1.293	26.934
1.38	25.517	-1.311	27.306
1.4	26	-1.324	27.676
1.42	26.22	-1.332	28.045
1.44	26.704	-1.342	28.413
1.46	27.319	-1.358	28.779
1.48	27.451	-1.376	29.145
1.5	27.89	-1.395	29.509
1.52	28.11	-1.407	29.873
1.54	28.725	-1.413	30.235
1.56	28.901	-1.413	30.596
1.58	29.208	-1.413	30.955
1.6	29.516	-1.419	31.314
1.62	29.912	-1.431	31.671
1.64	30.219	-1.446	32.027
1.66	30.527	-1.462	32.382
1.68	31.098	-1.483	32.736
1.7	31.406	-1.505	33.088
1.72	31.713	-1.528	33.439
1.74	32.065	-1.549	33.788
1.76	32.46	-1.569	34.136
1.78	32.988	-1.59	34.483
1.8	33.251	-1.609	34.829
1.82	33.647	-1.632	35.173
1.84	33.998	-1.656	35.516
1.86	34.306	-1.683	35.857
1.88	34.702	-1.714	36.197
1.9	34.833	-1.747	36.535
1.92	35.229	-1.785	36.872
1.94	35.493	-1.821	37.208
1.96	36.02	-1.862	37.542
1.98	36.284	-1.907	37.875
2	36.591	-1.959	38.206
2.02	36.987	-2.017	38.536
2.04	37.119	-2.073	38.864
2.06	37.646	-2.128	39.19
2.08	37.91	-2.177	39.515
2.1	38.261	-2.225	39.839
2.12	38.525	-2.275	40.161
2.14	39.008	-2.33	40.481
2.16	39.316	-2.385	40.8
2.18	39.623	-2.44	41.117
2.2	39.887	-2.491	41.433
2.22	40.458	-2.543	41.746
2.24	40.634	-2.593	42.059
2.26	41.118	-2.645	42.369
2.28	41.381	-2.696	42.678
2.3	41.689	-2.746	42.985
2.32	42.084	-2.798	43.291
2.34	42.128	-2.849	43.595
2.36	42.392	-2.904	43.897
2.38	42.831	-2.965	44.197
2.4	42.963	-3.026	44.496
2.42	43.271	-3.086	44.792
2.44	43.579	-3.139	45.087
2.46	43.93	-3.181	45.381
2.48	44.326	-3.21	45.672
2.5	44.677	-3.227	45.962
2.52	45.161	-3.245	46.25
2.54	45.204	-3.261	46.536
2.56	45.732	-3.277	46.82
2.58	45.952	-3.278	47.102
2.6	46.127	-3.27	47.383
2.62	46.567	-3.267	47.662
2.64	46.743	-3.276	47.938
2.66	47.05	-3.297	48.213
2.68	47.226	-3.322	48.486
2.7	47.49	-3.348	48.757
2.72	47.973	-3.374	49.026
2.74	48.237	-3.397	49.294
2.76	48.5	-3.421	49.559
2.78	48.676	-3.445	49.822
2.8	48.852	-3.469	50.083
2.82	49.072	-3.496	50.343
2.84	49.247	-3.529	50.6
2.86	49.687	-3.569	50.855
2.88	49.775	-3.606	51.109
2.9	50.17	-3.643	51.36
2.92	50.566	-3.68	51.609
2.94	50.654	-3.715	51.857
2.94	50.654	-3.715	51.857
2.98	51.489	-3.753	52.345
3	51.577	-3.758	52.586
3.02	51.928	-3.774	52.825
3.04	52.104	-3.796	53.062
3.06	52.324	-3.823	53.297
3.08	52.631	-3.851	53.53
3.1	52.851	-3.876	53.76
3.12	53.115	-3.894	53.989
3.14	53.159	-3.902	54.215
3.16	53.378	-3.912	54.439
3.18	53.598	-3.93	54.661
3.2	53.862	-3.951	54.881
3.22	54.125	-3.97	55.099
3.24	54.345	-3.989	55.315
3.26	54.609	-4.01	55.528
3.28	54.872	-4.032	55.739
3.3	55.224	-4.057	55.948
3.32	55.488	-4.088	56.155
3.34	55.488	-4.119	56.36
3.36	55.795	-4.145	56.562
3.38	56.015	-4.161	56.762
3.4	56.147	-4.17	56.96
3.42	56.454	-4.178	57.156
3.44	56.542	-4.182	57.349
3.46	56.806	-4.187	57.54
3.48	56.894	-4.194	57.729
3.5	57.07	-4.203	57.915
3.52	57.289	-4.211	58.1
3.54	57.553	-4.216	58.282
3.56	57.641	-4.221	58.461
3.58	57.729	-4.227	58.639
3.6	57.949	-4.236	58.814
3.62	58.388	-4.247	58.986
3.64	58.652	-4.253	59.157
3.66	58.74	-4.258	59.325
3.68	58.871	-4.272	59.491
3.7	59.091	-4.293	59.654
3.72	59.223	-4.313	59.815
3.74	59.355	-4.329	59.974
3.76	59.531	-4.35	60.13
3.78	59.619	-4.379	60.284
3.8	59.794	-4.415	60.435
3.82	59.97	-4.454	60.585
3.84	60.102	-4.491	60.731
3.86	60.322	-4.525	60.876
3.88	60.585	-4.557	61.018
3.9	60.629	-4.589	61.157
3.92	60.761	-4.628	61.294
3.94	60.893	-4.673	61.429
3.96	61.069	-4.718	61.561
3.98	61.069	-4.761	61.691
4	61.288	-4.799	61.819
4.02	61.288	-4.825	61.944
4.04	61.684	-4.848	62.066
4.06	61.684	-4.869	62.186
4.08	61.948	-4.893	62.304
4.1	61.948	-4.91	62.419
4.12	62.211	-4.927	62.532
4.14	62.299	-4.956	62.642
4.16	62.563	-4.999	62.75
4.18	62.563	-5.033	62.855
4.2	62.607	-5.047	62.958
4.22	62.651	-5.055	63.058
4.24	62.827	-5.073	63.156
4.26	62.871	-5.096	63.251
4.28	62.958	-5.114	63.344
4.3	63.09	-5.125	63.435
4.32	63.266	-5.142	63.522
4.34	63.31	-5.16	63.608
4.36	63.486	-5.178	63.691
4.38	63.53	-5.191	63.771
4.4	63.53	-5.204	63.849
4.42	63.705	-5.223	63.924
4.44	63.881	-5.25	63.997
4.46	63.925	-5.277	64.067
4.48	63.925	-5.293	64.135
4.5	64.013	-5.294	64.2
4.52	64.145	-5.289	64.262
4.54	64.145	-5.289	64.322
4.56	64.233	-5.29	64.38
4.58	64.365	-5.283	64.435
4.6	64.365	-5.266	64.487
4.62	64.409	-5.251	64.537
4.64	64.54	-5.245	64.585
4.66	64.54	-5.242	64.63
4.68	64.716	-5.24	64.672
4.7	64.716	-5.233	64.712
4.72	64.76	-5.222	64.749
4.74	64.804	-5.212	64.783
4.76	64.848	-5.205	64.815
4.78	64.804	-5.195	64.845
4.8	64.848	-5.181	64.872
4.82	64.848	-5.166	64.896
4.84	64.848	-5.153	64.918
4.86	65.024	-5.14	64.937
4.88	65.024	-5.118	64.954
4.9	65.024	-5.086	64.968
4.92	65.112	-5.048	64.979
4.94	65.112	-5.008	64.988
4.96	65.156	-4.977	64.995
4.98	65.156	-4.957	64.999
5	65.156	-4.944	65
5.02	65.156	-4.936	64.999
5.04	65.2	-4.933	64.995
5.06	65.2	-4.931	64.988
5.08	65.2	-4.926	64.979
5.1	65.2	-4.919	64.968
5.12	65.2	-4.913	64.954
5.14	65.2	-4.906	64.937
5.16	65.2	-4.897	64.918
5.18	65.2	-4.884	64.896
5.2	65.112	-4.864	64.872
5.22	65.112	-4.829	64.845
5.24	65.112	-4.776	64.815
5.26	65.112	-4.707	64.783
5.28	65.112	-4.629	64.749
5.3	65.112	-4.55	64.712
5.32	65.068	-4.482	64.672
5.34	65.024	-4.428	64.63
5.36	65.024	-4.385	64.585
5.38	65.024	-4.35	64.537
5.4	64.936	-4.32	64.487
5.42	64.892	-4.295	64.435
5.44	64.848	-4.271	64.38
5.46	64.848	-4.247	64.322
5.48	64.76	-4.215	64.262
5.5	64.716	-4.171	64.2
5.52	64.716	-4.117	64.135
5.54	64.54	-4.066	64.067
5.56	64.496	-4.028	63.997
5.58	64.277	-3.996	63.924
5.6	64.277	-3.969	63.849
5.62	64.101	-3.946	63.771
5.64	64.101	-3.93	63.691
5.66	64.057	-3.91	63.608
5.68	64.057	-3.885	63.522
5.7	64.057	-3.856	63.435
5.72	64.013	-3.827	63.344
5.74	63.925	-3.793	63.251
5.76	63.881	-3.757	63.156
5.78	63.749	-3.723	63.058
5.8	63.618	-3.688	62.958
5.82	63.618	-3.646	62.855
5.84	63.31	-3.596	62.75
5.86	63.266	-3.55	62.642
5.88	63.266	-3.51	62.532
5.9	63.002	-3.467	62.419
5.92	62.958	-3.423	62.304
5.94	62.914	-3.38	62.186
5.96	62.871	-3.339	62.066
5.98	62.739	-3.293	61.944
6	62.607	-3.245	61.819
6.02	62.519	-3.201	61.691
6.04	62.475	-3.161	61.561
6.06	62.299	-3.12	61.429
6.08	61.992	-3.074	61.294
6.1	61.904	-3.033	61.157
6.12	61.728	-2.995	61.018
6.14	61.684	-2.956	60.876
6.16	61.596	-2.91	60.731
6.18	61.464	-2.864	60.585
6.2	61.288	-2.821	60.435
6.22	61.025	-2.78	60.284
6.24	60.981	-2.74	60.13
6.26	60.805	-2.699	59.974
6.28	60.761	-2.661	59.815
6.3	60.497	-2.623	59.654
6.32	60.41	-2.585	59.491
6.34	60.366	-2.545	59.325
6.36	60.278	-2.506	59.157
6.38	59.882	-2.466	58.986
6.4	59.794	-2.429	58.814
6.42	59.706	-2.389	58.639
6.44	59.531	-2.351	58.461
6.46	59.223	-2.317	58.282
6.48	58.915	-2.284	58.1
6.5	58.871	-2.246	57.915
6.52	58.696	-2.199	57.729
6.54	58.608	-2.153	57.54
6.56	58.564	-2.118	57.349
6.58	58.08	-2.094	57.156
6.6	57.993	-2.079	56.96
6.62	57.949	-2.061	56.762
6.64	57.773	-2.035	56.562
6.66	57.377	-2.005	56.36
6.68	57.289	-1.982	56.155
6.7	57.07	-1.966	55.948
6.72	57.07	-1.956	55.739
6.74	56.718	-1.941	55.528
6.76	56.454	-1.915	55.315
6.78	56.191	-1.881	55.099
6.8	56.103	-1.847	54.881
6.82	55.795	-1.817	54.661
6.84	55.707	-1.795	54.439
6.86	55.4	-1.771	54.215
6.88	55.224	-1.745	53.989
6.9	55.004	-1.717	53.76
6.92	54.785	-1.689	53.53
6.94	54.609	-1.664	53.297
6.96	54.345	-1.638	53.062
6.98	54.125	-1.614	52.825
7	53.906	-1.593	52.586
7.02	53.598	-1.575	52.345
7.04	53.334	-1.56	52.102
7.06	53.071	-1.545	51.857
7.08	52.983	-1.531	51.609
7.1	52.499	-1.513	51.36
7.12	52.368	-1.499	51.109
7.14	52.148	-1.483	50.855
7.16	51.928	-1.467	50.6
7.18	51.708	-1.45	50.343
7.2	51.445	-1.43	50.083
7.22	51.181	-1.407	49.822
7.24	51.005	-1.382	49.559
7.26	50.566	-1.356	49.294
7.28	50.522	-1.336	49.026
7.3	50.346	-1.319	48.757
7.32	49.863	-1.302	48.486
7.34	49.775	-1.29	48.213
7.36	49.335	-1.277	47.938
7.38	49.116	-1.263	47.662
7.4	48.984	-1.248	47.383
7.42	48.5	-1.229	47.102
7.44	48.369	-1.214	46.82
7.46	47.973	-1.2	46.536
7.48	47.753	-1.188	46.25
7.5	47.402	-1.173	45.962
7.52	47.226	-1.158	45.672
7.54	47.05	-1.144	45.381
7.56	46.655	-1.129	45.087
7.58	46.259	-1.115	44.792
7.6	46.039	-1.099	44.496
7.62	45.6	-1.076	44.197
7.64	45.512	-1.053	43.897
7.66	45.161	-1.028	43.595
7.68	44.897	-1.006	43.291
7.7	44.413	-0.987	42.985
7.72	44.238	-0.974	42.678
7.74	43.93	-0.96	42.369
7.76	43.622	-0.946	42.059
7.78	43.315	-0.932	41.746
7.8	42.963	-0.917	41.433
7.82	42.744	-0.902	41.117
7.84	42.436	-0.885	40.8
7.86	42.216	-0.867	40.481
7.88	41.733	-0.849	40.161
7.9	41.601	-0.833	39.839
7.92	41.205	-0.816	39.515
7.94	40.854	-0.799	39.19
7.96	40.59	-0.781	38.864
7.98	40.151	-0.762	38.536
8	40.063	-0.747	38.206
8.02	39.799	-0.732	37.875
8.04	39.184	-0.715	37.542
8.06	38.92	-0.699	37.208
8.08	38.569	-0.682	36.872
8.1	38.173	-0.666	36.535
8.12	37.822	-0.652	36.197
8.14	37.69	-0.641	35.857
8.16	37.294	-0.629	35.516
8.18	36.855	-0.617	35.173
8.2	36.635	-0.605	34.829
8.22	36.371	-0.594	34.483
8.24	35.844	-0.581	34.136
8.26	35.624	-0.572	33.788
8.28	35.361	-0.563	33.439
8.3	34.921	-0.553	33.088
8.32	34.526	-0.541	32.736
8.34	34.262	-0.528	32.382
8.36	33.735	-0.515	32.027
8.38	33.559	-0.506	31.671
8.4	32.9	-0.494	31.314
8.42	32.856	-0.486	30.955
8.44	32.46	-0.476	30.596
8.46	32.021	-0.467	30.235
8.48	31.757	-0.459	29.873
8.5	31.494	-0.45	29.509
8.52	30.79	-0.438	29.145
8.54	30.483	-0.428	28.779
8.56	30.043	-0.418	28.413
8.58	29.868	-0.411	28.045
8.6	29.384	-0.402	27.676
8.62	29.164	-0.394	27.306
8.64	28.945	-0.387	26.934
8.66	28.637	-0.382	26.562
8.68	28.417	-0.379	26.189
8.7	27.978	-0.374	25.815
8.72	27.538	-0.368	25.439
8.74	27.099	-0.361	25.063
8.76	26.616	-0.353	24.686
8.78	26.308	-0.345	24.307
8.8	25.693	-0.334	23.928
8.82	25.341	-0.323	23.548
8.84	25.078	-0.311	23.167
8.86	24.55	-0.297	22.785
8.88	24.155	-0.285	22.402
8.9	23.803	-0.275	22.018
8.92	23.452	-0.269	21.633
8.94	23.012	-0.262	21.248
8.96	22.704	-0.254	20.861
8.98	22.353	-0.245	20.474
9	22.045	-0.237	20.086
9.02	21.65	-0.233	19.697
9.04	21.166	-0.231	19.308
9.06	20.991	-0.23	18.917
9.08	20.419	-0.225	18.526
9.1	20.244	-0.219	18.134
9.12	19.848	-0.212	17.742
9.14	19.453	-0.205	17.349
9.16	19.013	-0.2	16.955
9.18	18.442	-0.196	16.56
9.2	18.178	-0.194	16.165
9.22	17.958	-0.194	15.769
9.24	17.299	-0.192	15.372
9.26	16.992	-0.19	14.975
9.28	16.596	-0.184	14.578
9.3	16.201	-0.176	14.179
9.32	15.717	-0.166	13.78
9.34	15.41	-0.159	13.381
9.36	14.926	-0.156	12.981
9.38	14.662	-0.157	12.581
9.4	14.267	-0.161	12.18
9.42	13.828	-0.167	11.778
9.44	13.388	-0.173	11.376
9.46	12.905	-0.178	10.974
9.48	12.597	-0.183	10.571
9.5	12.333	-0.186	10.168
9.52	11.806	-0.186	9.765
9.54	11.454	-0.184	9.361
9.56	10.971	-0.181	8.956
9.58	10.576	-0.181	8.552
9.6	10.092	-0.181	8.147
9.62	9.653	-0.181	7.741
9.64	9.301	-0.179	7.336
9.66	8.862	-0.175	6.93
9.68	8.51	-0.171	6.524
9.7	8.159	-0.168	6.117
9.72	7.719	-0.167	5.71
9.74	7.192	-0.169	5.303
9.76	6.928	-0.172	4.896
9.78	6.577	-0.176	4.489
9.8	6.093	-0.177	4.081
9.82	5.742	-0.175	3.674
9.84	5.346	-0.17	3.266
9.86	4.907	-0.163	2.858
9.88	4.511	-0.156	2.45
9.9	4.072	-0.149	2.042
9.92	3.72	-0.146	1.633
9.94	3.237	-0.147	1.225
9.96	2.885	-0.15	0.817
9.98	2.446	-0.155	0.408
10	2.006	-0.157	0
10.02	1.523	-0.158	-0.408
10.04	1.083	-0.154	-0.817
10.06	0.776	-0.146	-1.225
10.08	0.204	-0.134	-1.633
10.1	-0.059	-0.122	-2.513
10.12	-0.455	-0.112	-3.015
10.14	-0.85	-0.101	-3.517
10.16	-1.246	-0.091	-4.02
10.18	-1.597	-0.082	-4.521
10.2	-1.993	-0.075	-5.023
10.22	-2.564	-0.067	-5.525
10.24	-3.004	-0.055	-6.026
10.26	-3.663	-0.039	-6.527
10.28	-4.278	-0.022	-7.028
10.3	-4.673	-0.009	-7.529
10.32	-5.377	0.001	-8.029
10.34	-6.036	0.012	-8.529
10.36	-6.563	0.025	-9.029
10.38	-7.178	0.039	-9.528
10.4	-7.838	0.053	-10.027
10.42	-8.409	0.068	-10.525
10.44	-8.892	0.082	-11.023
10.46	-9.42	0.093	-11.521
10.48	-9.903	0.104	-12.018
10.5	-10.386	0.116	-12.515
10.52	-10.87	0.131	-13.011
10.54	-11.309	0.145	-13.507
10.56	-11.617	0.155	-14.002
10.58	-12.144	0.159	-14.496
10.6	-12.584	0.162	-14.991
10.62	-13.023	0.17	-15.484
10.64	-13.55	0.184	-15.977
10.66	-13.99	0.202	-16.469
10.68	-14.341	0.219	-16.961
10.7	-14.957	0.232	-17.451
10.72	-15.396	0.241	-17.942
10.74	-16.055	0.248	-18.431
10.76	-16.495	0.255	-18.92
10.78	-17.066	0.261	-19.408
10.8	-17.549	0.266	-19.895
10.82	-18.165	0.269	-20.382
10.84	-18.692	0.275	-20.867
10.86	-19.175	0.282	-21.352
10.88	-19.703	0.286	-21.836
10.9	-20.142	0.284	-22.319
10.92	-20.626	0.278	-22.802
10.94	-21.021	0.273	-23.283
10.96	-21.592	0.276	-23.763
10.98	-22.032	0.289	-24.243
11	-22.427	0.309	-24.721
11.02	-22.955	0.327	-25.199
11.04	-23.394	0.34	-25.675
11.06	-23.878	0.345	-26.151
11.08	-24.361	0.343	-26.626
11.1	-24.888	0.339	-27.099
11.12	-25.328	0.339	-27.571
11.14	-25.723	0.345	-28.043
11.16	-26.251	0.356	-28.513
11.18	-26.734	0.371	-28.982
11.2	-27.305	0.386	-29.45
11.22	-27.745	0.401	-29.917
11.24	-28.228	0.415	-30.382
11.26	-28.755	0.423	-30.847
11.28	-29.195	0.427	-31.31
11.3	-29.722	0.427	-31.772
11.32	-30.162	0.431	-32.233
11.34	-30.513	0.441	-32.692
11.36	-30.953	0.456	-33.15
11.38	-31.304	0.474	-33.607
11.4	-31.788	0.488	-34.062
11.42	-32.271	0.494	-34.516
11.44	-32.711	0.489	-34.969
11.46	-33.238	0.477	-35.421
11.48	-33.721	0.466	-35.871
11.5	-34.205	0.464	-36.319
11.52	-34.644	0.474	-36.766
11.54	-35.215	0.491	-37.212
11.56	-35.699	0.513	-37.656
11.58	-36.138	0.534	-38.099
11.6	-36.622	0.552	-38.54
11.62	-37.061	0.568	-38.98
11.64	-37.545	0.586	-39.418
11.66	-37.984	0.612	-39.855
11.68	-38.379	0.648	-40.29
11.7	-38.819	0.691	-40.723
11.72	-39.302	0.733	-41.155
11.74	-39.698	0.774	-41.585
11.76	-40.093	0.816	-42.014
11.78	-40.533	0.865	-42.441
11.8	-40.928	0.924	-42.866
11.82	-41.368	0.988	-43.29
11.84	-41.807	1.052	-43.712
11.86	-42.159	1.112	-44.132
11.88	-42.598	1.162	-44.55
11.9	-43.082	1.208	-44.967
11.92	-43.477	1.254	-45.382
11.94	-43.917	1.302	-45.795
11.96	-44.4	1.352	-46.206
11.98	-44.752	1.402	-46.615
12	-45.279	1.45	-47.023
12.02	-45.63	1.505	-47.429
12.04	-46.114	1.569	-47.832
12.06	-46.597	1.642	-48.234
12.08	-46.993	1.717	-48.634
12.1	-47.344	1.783	-49.033
12.12	-47.74	1.837	-49.429
12.14	-48.135	1.887	-49.823
12.16	-48.531	1.938	-50.215
12.18	-48.882	1.993	-50.606
12.2	-49.322	2.055	-50.994
12.22	-49.673	2.126	-51.38
12.24	-50.025	2.208	-51.764
12.26	-50.421	2.294	-52.147
12.28	-50.816	2.376	-52.527
12.3	-51.255	2.447	-52.905
12.32	-51.607	2.506	-53.281
12.34	-52.09	2.552	-53.655
12.36	-52.442	2.592	-54.027
12.38	-52.925	2.622	-54.396
12.4	-53.277	2.642	-54.764
12.42	-53.629	2.649	-55.129
12.44	-54.068	2.644	-55.492
12.46	-54.463	2.631	-55.853
12.48	-54.771	2.613	-56.212
12.5	-55.123	2.586	-56.569
12.52	-55.474	2.549	-56.923
12.54	-55.782	2.502	-57.275
12.56	-56.177	2.452	-57.625
12.58	-56.485	2.409	-57.972
12.6	-56.793	2.376	-58.317
12.62	-57.232	2.353	-58.66
12.64	-57.54	2.341	-59.001
12.66	-57.891	2.34	-59.339
12.68	-58.243	2.352	-59.675
12.7	-58.682	2.374	-60.009
12.72	-58.99	2.4	-60.34
12.74	-59.341	2.419	-60.669
12.76	-59.693	2.429	-60.995
12.78	-60.045	2.43	-61.319
12.8	-60.352	2.427	-61.641
12.82	-60.66	2.426	-61.96
12.84	-61.055	2.426	-62.277
12.86	-61.231	2.433	-62.591
12.88	-61.627	2.437	-62.903
12.9	-61.978	2.434	-63.212
12.92	-62.286	2.421	-63.519
12.94	-62.593	2.397	-63.824
12.96	-63.121	2.367	-64.125
12.98	-63.253	2.34	-64.425
13	-63.604	2.311	-64.721
13.02	-64	2.278	-65.016
13.04	-64.263	2.239	-65.307
13.06	-64.483	2.194	-65.596
13.08	-64.747	2.15	-65.883
13.1	-65.098	2.11	-66.166
13.12	-65.318	2.073	-66.448
13.14	-65.582	2.032	-66.726
13.16	-65.845	1.983	-67.002
13.18	-66.153	1.939	-67.276
13.2	-66.504	1.912	-67.546
13.22	-66.768	1.906	-67.814
13.24	-66.988	1.909	-68.08
13.26	-67.383	1.91	-68.342
13.28	-67.471	1.91	-68.602
13.3	-67.955	1.905	-68.859
13.32	-68.218	1.903	-69.114
13.34	-68.438	1.904	-69.366
13.36	-68.746	1.908	-69.615
13.38	-68.965	1.921	-69.861
13.4	-69.229	1.943	-70.105
13.42	-69.537	1.97	-70.345
13.44	-69.713	1.999	-70.583
13.46	-69.976	2.028	-70.819
13.48	-70.284	2.059	-71.051
13.5	-70.372	2.098	-71.281
13.52	-70.547	2.142	-71.507
13.54	-70.855	2.184	-71.731
13.56	-71.119	2.22	-71.952
13.58	-71.207	2.251	-72.171
13.6	-71.558	2.285	-72.386
13.62	-71.822	2.335	-72.599
13.64	-71.998	2.405	-72.808
13.66	-72.129	2.485	-73.015
13.68	-72.437	2.56	-73.219
13.7	-72.701	2.624	-73.42
13.72	-72.833	2.675	-73.619
13.74	-73.096	2.715	-73.814
13.76	-73.272	2.751	-74.006
13.78	-73.536	2.784	-74.196
13.8	-73.799	2.816	-74.382
13.82	-74.019	2.848	-74.566
13.84	-74.195	2.881	-74.746
13.86	-74.371	2.915	-74.924
13.88	-74.546	2.95	-75.099
13.9	-74.766	2.985	-75.27
13.92	-74.986	3.02	-75.439
13.94	-75.03	3.06	-75.605
13.96	-75.118	3.104	-75.768
13.98	-75.25	3.146	-75.928
14	-75.513	3.182	-76.085
14.02	-75.777	3.21	-76.238
14.04	-75.953	3.239	-76.389
14.06	-76.129	3.273	-76.537
14.08	-76.172	3.314	-76.682
14.1	-76.304	3.355	-76.823
14.12	-76.568	3.391	-76.962
14.14	-76.612	3.426	-77.098
14.16	-76.788	3.458	-77.231
14.18	-77.051	3.491	-77.36
14.2	-77.051	3.526	-77.487
14.22	-77.271	3.556	-77.61
14.24	-77.403	3.583	-77.731
14.26	-77.447	3.61	-77.848
14.28	-77.667	3.64	-77.962
14.3	-77.754	3.674	-78.073
14.32	-77.886	3.702	-78.181
14.34	-77.886	3.722	-78.286
14.36	-78.194	3.733	-78.388
14.38	-78.326	3.741	-78.487
14.4	-78.37	3.748	-78.583
14.42	-78.546	3.753	-78.676
14.44	-78.633	3.759	-78.765
14.46	-78.677	3.764	-78.852
14.48	-78.721	3.769	-78.935
14.5	-78.809	3.771	-79.015
14.52	-78.897	3.77	-79.092
14.54	-79.029	3.765	-79.166
14.56	-79.073	3.756	-79.237
14.58	-79.073	3.741	-79.305
14.6	-79.293	3.72	-79.369
14.62	-79.38	3.698	-79.431
14.64	-79.424	3.673	-79.489
14.66	-79.424	3.646	-79.544
14.68	-79.512	3.617	-79.596
14.7	-79.644	3.592	-79.645
14.72	-79.776	3.572	-79.691
14.74	-79.82	3.556	-79.733
14.76	-79.82	3.542	-79.773
14.78	-79.864	3.527	-79.809
14.8	-79.952	3.512	-79.842
14.82	-79.996	3.494	-79.872
14.84	-79.996	3.472	-79.899
14.86	-80.084	3.444	-79.923
14.88	-80.084	3.415	-79.943
14.9	-80.084	3.392	-79.961
14.92	-80.128	3.379	-79.975
14.94	-80.128	3.375	-79.986
14.96	-80.259	3.373	-79.994
14.98	-80.259	3.371	-79.998
15	-80.215	3.365	-80
15.02	-80.215	3.358	-79.998
15.04	-80.215	3.347	-79.994
15.06	-80.215	3.331	-79.986
15.08	-80.215	3.307	-79.975
15.1	-80.215	3.278	-79.961
15.12	-80.259	3.251	-79.943
15.14	-80.259	3.23	-79.923
15.16	-80.215	3.218	-79.899
15.18	-80.215	3.212	-79.872
15.2	-80.215	3.207	-79.842
15.22	-80.171	3.2	-79.809
15.24	-80.171	3.186	-79.773
15.26	-80.171	3.167	-79.733
15.28	-80.171	3.146	-79.691
15.3	-80.128	3.127	-79.645
15.32	-80.04	3.111	-79.596
15.34	-79.908	3.099	-79.544
15.36	-79.908	3.086	-79.489
15.38	-79.908	3.075	-79.431
15.4	-79.82	3.065	-79.369
15.42	-79.732	3.055	-79.305
15.44	-79.688	3.046	-79.237
15.46	-79.688	3.038	-79.166
15.48	-79.644	3.034	-79.092
15.5	-79.6	3.031	-79.015
15.52	-79.512	3.028	-78.935
15.54	-79.468	3.024	-78.852
15.56	-79.424	3.022	-78.765
15.58	-79.293	3.023	-78.676
15.6	-79.249	3.022	-78.583
15.62	-79.205	3.015	-78.487
15.64	-78.985	3.009	-78.388
15.66	-78.985	3.004	-78.286
15.68	-78.941	3.003	-78.181
15.7	-78.765	3.003	-78.073
15.72	-78.721	2.999	-77.962
15.74	-78.633	2.993	-77.848
15.76	-78.414	2.987	-77.731
15.78	-78.37	2.976	-77.61
15.8	-78.37	2.959	-77.487
15.82	-78.194	2.939	-77.36
15.84	-78.062	2.917	-77.231
15.86	-77.93	2.892	-77.098
15.88	-77.886	2.867	-76.962
15.9	-77.798	2.846	-76.823
15.92	-77.623	2.832	-76.682
15.94	-77.447	2.818	-76.537
15.96	-77.271	2.799	-76.389
15.98	-77.139	2.774	-76.238
16	-76.963	2.746	-76.085
16.02	-76.788	2.719	-75.928
16.04	-76.7	2.69	-75.768
16.06	-76.524	2.661	-75.605
16.08	-76.348	2.635	-75.439
16.1	-76.216	2.615	-75.27
16.12	-76.041	2.6	-75.099
16.14	-75.953	2.583	-74.924
16.16	-75.777	2.562	-74.746
16.18	-75.645	2.532	-74.566
16.2	-75.425	2.497	-74.382
16.22	-75.294	2.458	-74.196
16.24	-75.162	2.416	-74.006
16.26	-74.942	2.375	-73.814
16.28	-74.678	2.333	-73.619
16.3	-74.678	2.289	-73.42
16.32	-74.371	2.249	-73.219
16.34	-74.151	2.21	-73.015
16.36	-73.931	2.177	-72.808
16.38	-73.887	2.146	-72.599
16.4	-73.536	2.121	-72.386
16.42	-73.404	2.093	-72.171
16.44	-73.184	2.062	-71.952
16.46	-72.921	2.03	-71.731
16.48	-72.789	1.996	-71.507
16.5	-72.525	1.965	-71.281
16.52	-72.305	1.933	-71.051
16.54	-72.086	1.899	-70.819
16.56	-71.91	1.861	-70.583
16.58	-71.69	1.822	-70.345
16.6	-71.382	1.785	-70.105
16.62	-71.163	1.752	-69.861
16.64	-70.899	1.721	-69.615
16.66	-70.679	1.688	-69.366
16.68	-70.504	1.65	-69.114
16.7	-70.196	1.613	-68.859
16.72	-69.844	1.58	-68.602
16.74	-69.669	1.548	-68.342
16.76	-69.537	1.517	-68.08
16.78	-69.185	1.487	-67.814
16.8	-69.053	1.452	-67.546
16.82	-68.79	1.417	-67.276
16.84	-68.57	1.383	-67.002
16.86	-68.262	1.353	-66.726
16.88	-67.955	1.327	-66.448
16.9	-67.691	1.304	-66.166
16.92	-67.471	1.282	-65.883
16.94	-67.076	1.261	-65.596
16.96	-66.812	1.237	-65.307
16.98	-66.504	1.214	-65.016
17	-66.241	1.192	-64.721
17.02	-65.933	1.172	-64.425
17.04	-65.582	1.153	-64.125
17.06	-65.362	1.13	-63.824
17.08	-65.054	1.106	-63.519
17.1	-64.703	1.08	-63.212
17.12	-64.439	1.057	-62.903
17.14	-64.175	1.038	-62.591
17.16	-63.868	1.023	-62.277
17.18	-63.604	1.008	-61.96
17.2	-63.253	0.994	-61.641
17.22	-62.989	0.978	-61.319
17.24	-62.681	0.964	-60.995
17.26	-62.418	0.952	-60.669
17.28	-62.066	0.943	-60.34
17.3	-61.758	0.935	-60.009
17.32	-61.495	0.928	-59.675
17.34	-61.187	0.922	-59.339
17.36	-60.792	0.916	-59.001
17.38	-60.484	0.908	-58.66
17.4	-60.088	0.898	-58.317
17.42	-59.737	0.882	-57.972
17.44	-59.341	0.865	-57.625
17.46	-59.034	0.849	-57.275
17.48	-58.682	0.839	-56.923
17.5	-58.243	0.835	-56.569
17.52	-57.979	0.829	-56.212
17.54	-57.671	0.82	-55.853
17.56	-57.276	0.808	-55.492
17.58	-56.924	0.795	-55.129
17.6	-56.617	0.781	-54.764
17.62	-56.309	0.769	-54.396
17.64	-55.826	0.76	-54.027
17.66	-55.562	0.751	-53.655
17.68	-55.123	0.746	-53.281
17.7	-54.859	0.738	-52.905
17.72	-54.42	0.728	-52.527
17.74	-54.024	0.715	-52.147
17.76	-53.716	0.703	-51.764
17.78	-53.277	0.697	-51.38
17.8	-52.881	0.692	-50.994
17.82	-52.486	0.684	-50.606
17.84	-52.266	0.67	-50.215
17.86	-51.827	0.656	-49.823
17.88	-51.387	0.645	-49.429
17.9	-51.036	0.641	-49.033
17.92	-50.684	0.644	-48.634
17.94	-50.289	0.651	-48.234
17.96	-49.849	0.662	-47.832
17.98	-49.454	0.678	-47.429
18	-49.058	0.695	-47.023
18.02	-48.663	0.71	-46.615
18.04	-48.223	0.717	-46.206
18.06	-47.828	0.713	-45.795
18.08	-47.476	0.701	-45.382
18.1	-47.037	0.691	-44.967
18.12	-46.685	0.687	-44.55
18.14	-46.158	0.69	-44.132
18.16	-45.718	0.696	-43.712
18.18	-45.367	0.698	-43.29
18.2	-44.971	0.697	-42.866
18.22	-44.532	0.693	-42.441
18.24	-44.136	0.688	-42.014
18.26	-43.785	0.681	-41.585
18.28	-43.345	0.668	-41.155
18.3	-42.906	0.644	-40.723
18.32	-42.51	0.61	-40.29
18.34	-42.071	0.574	-39.855
18.36	-41.588	0.547	-39.418
18.38	-41.192	0.528	-38.98
18.4	-40.753	0.512	-38.54
18.42	-40.313	0.492	-38.099
18.44	-39.918	0.464	-37.656
18.46	-39.522	0.43	-37.212
18.48	-39.258	0.394	-36.766
18.5	-38.775	0.363	-36.319
18.52	-38.379	0.338	-35.871
18.54	-37.94	0.321	-35.421
18.56	-37.501	0.313	-34.969
18.58	-36.973	0.311	-34.516
18.6	-36.534	0.306	-34.062
18.62	-36.006	0.297	-33.607
18.64	-35.523	0.281	-33.15
18.66	-34.952	0.261	-32.692
18.68	-34.512	0.239	-32.233
18.7	-33.985	0.215	-31.772
18.72	-33.546	0.191	-31.31
18.74	-33.062	0.167	-30.847
18.78	-32.139	0.135	-29.917
18.8	-31.568	0.132	-29.45
18.82	-31.216	0.132	-28.982
18.84	-30.777	0.134	-28.513
18.86	-30.294	0.134	-28.043
18.88	-29.766	0.131	-27.571
18.9	-29.371	0.122	-27.099
18.92	-28.975	0.108	-26.626
18.94	-28.536	0.091	-26.151
18.96	-28.052	0.069	-25.675
18.98	-27.613	0.043	-25.199
19	-27.173	0.019	-24.721
19.02	-26.69	0.001	-24.243
19.04	-26.207	-0.011	-23.763
19.06	-25.767	-0.02	-23.283
19.08	-25.24	-0.03	-22.802
19.1	-24.713	-0.044	-22.319
19.12	-24.273	-0.063	-21.836
19.14	-23.79	-0.083	-21.352
19.16	-23.35	-0.106	-20.867
19.18	-22.779	-0.127	-20.382
19.2	-22.252	-0.146	-19.895
19.22	-21.856	-0.163	-19.408
19.24	-21.285	-0.178	-18.92
19.26	-20.933	-0.194	-18.431
19.28	-20.274	-0.208	-17.942
19.3	-19.879	-0.217	-17.451
19.32	-19.307	-0.217	-16.961
19.34	-18.868	-0.208	-16.469
19.36	-18.428	-0.192	-15.977
19.38	-17.901	-0.175	-15.484
19.4	-17.418	-0.165	-14.991
19.42	-16.89	-0.168	-14.496
19.44	-16.407	-0.185	-14.002
19.46	-16.011	-0.21	-13.507
19.48	-15.484	-0.231	-13.011
19.5	-15.045	-0.244	-12.515
19.52	-14.429	-0.248	-12.018
19.54	-13.99	-0.251	-11.521
19.56	-13.594	-0.253	-11.023
19.58	-12.935	-0.253	-10.525
19.6	-12.54	-0.25	-10.027
19.62	-12.012	-0.244	-9.528
19.64	-11.485	-0.238	-9.029
19.66	-10.958	-0.235	-8.529
19.68	-10.474	-0.236	-8.029
19.7	-10.079	-0.24	-7.529
19.72	-9.463	-0.245	-7.028
19.74	-8.98	-0.252	-6.527
19.76	-8.585	-0.264	-6.026
19.78	-8.145	-0.281	-5.525
19.8	-7.442	-0.301	-5.023
19.82	-7.046	-0.316	-4.521
19.84	-6.563	-0.326	-4.02
19.86	-6.124	-0.332	-3.517
19.88	-5.333	-0.34	-3.015
19.9	-4.893	-0.35	-2.513
19.92	-4.542	-0.36	-2.01
19.94	-4.014	-0.366	-1.508
19.96	-3.399	-0.369	-1.005
19.98	-2.96	-0.373	-0.503
20	-2.256	-0.38	0
20.02	-1.949	-0.39	0.503
20.04	-1.553	-0.401	1.005
20.06	-0.894	-0.411	1.508
20.08	-0.455	-0.42	2.01
20.1	0.029	-0.43	2.042
20.12	0.468	-0.437	2.45
20.14	0.996	-0.444	2.858
20.16	1.391	-0.449	3.266
20.18	2.006	-0.456	3.674
20.2	2.578	-0.465	4.081
20.22	2.885	-0.476	4.489
20.24	3.325	-0.488	4.896
20.26	3.632	-0.496	5.303
20.28	4.072	-0.502	5.71
20.3	4.379	-0.507	6.117
20.32	4.819	-0.512	6.524
20.34	5.126	-0.517	6.93
20.36	5.434	-0.521	7.336
20.38	5.654	-0.527	7.741
20.4	6.049	-0.537	8.147
20.42	6.401	-0.551	8.552
20.44	6.884	-0.565	8.956
20.46	7.148	-0.578	9.361
20.48	7.675	-0.587	9.765
20.5	7.895	-0.593	10.168
20.52	8.378	-0.597	10.571
20.54	8.774	-0.601	10.974
20.56	9.433	-0.607	11.376
20.58	9.741	-0.612	11.778
20.6	10.048	-0.617	12.18
20.62	10.4	-0.621	12.581
20.64	11.103	-0.626	12.981
20.66	11.586	-0.633	13.381
20.68	11.938	-0.641	13.78
20.7	12.333	-0.65	14.179
20.72	12.685	-0.659	14.578
20.74	13.168	-0.667	14.975
20.76	13.52	-0.675	15.372
20.78	13.915	-0.682	15.769
20.8	14.355	-0.69	16.165
20.82	14.662	-0.697	16.56
20.84	14.97	-0.701	16.955
20.86	15.366	-0.703	17.349
20.88	15.717	-0.705	17.742
20.9	16.157	-0.71	18.134
20.92	16.552	-0.717	18.526
20.94	16.904	-0.724	18.917
20.96	17.343	-0.732	19.308
20.98	17.651	-0.741	19.697
21	18.31	-0.753	20.086
21.02	18.749	-0.764	20.474
21.04	18.925	-0.775	20.861
21.06	19.496	-0.785	21.248
21.08	20.112	-0.793	21.633
21.1	20.331	-0.799	22.018
21.12	20.771	-0.804	22.402
21.14	21.035	-0.807	22.785
21.16	21.518	-0.811	23.167
21.18	21.738	-0.817	23.548
21.2	22.221	-0.829	23.928
21.22	22.573	-0.843	24.307
21.24	22.968	-0.857	24.686
21.26	23.276	-0.867	25.063
21.28	23.583	-0.873	25.439
21.3	23.979	-0.879	25.815
21.32	24.374	-0.888	26.189
21.34	24.726	-0.903	26.562
21.36	25.121	-0.922	26.934
21.38	25.385	-0.939	27.306
21.4	25.781	-0.951	27.676
21.42	26.308	-0.96	28.045
21.44	26.66	-0.97	28.413
21.46	27.099	-0.987	28.779
21.48	27.538	-1.008	29.145
21.5	27.758	-1.028	29.509
21.52	28.198	-1.046	29.873
21.54	28.637	-1.062	30.235
21.56	28.857	-1.075	30.596
21.58	29.252	-1.089	30.955
21.6	29.648	-1.103	31.314
21.62	29.912	-1.115	31.671
21.64	30.395	-1.13	32.027
21.66	30.659	-1.146	32.382
21.68	31.01	-1.166	32.736
21.7	31.45	-1.188	33.088
21.72	31.889	-1.211	33.439
21.74	32.197	-1.232	33.788
21.76	32.548	-1.253	34.136
21.78	32.856	-1.277	34.483
21.8	33.163	-1.305	34.829
21.82	33.647	-1.334	35.173
21.84	33.911	-1.357	35.516
21.86	34.042	-1.376	35.857
21.88	34.614	-1.396	36.197
21.9	35.009	-1.417	36.535
21.92	35.273	-1.438	36.872
21.94	35.537	-1.459	37.208
21.96	35.932	-1.481	37.542
21.98	36.503	-1.508	37.875
22	36.591	-1.537	38.206
22.02	37.031	-1.573	38.536
22.04	37.514	-1.612	38.864
22.06	37.822	-1.652	39.19
22.08	38.085	-1.693	39.515
22.1	38.305	-1.733	39.839
22.12	38.92	-1.772	40.161
22.14	39.096	-1.804	40.481
22.16	39.404	-1.836	40.8
22.18	39.711	-1.869	41.117
22.2	39.931	-1.904	41.433
22.22	40.063	-1.939	41.746
22.24	40.546	-1.975	42.059
22.26	40.81	-2.006	42.369
22.28	41.249	-2.038	42.678
22.3	41.425	-2.07	42.985
22.32	41.821	-2.109	43.291
22.34	42.084	-2.152	43.595
22.36	42.656	-2.197	43.897
22.38	43.007	-2.233	44.197
22.4	43.139	-2.257	44.496
22.42	43.315	-2.275	44.792
22.44	43.93	-2.294	45.087
22.46	44.194	-2.313	45.381
22.48	44.545	-2.335	45.672
22.5	44.545	-2.356	45.962
22.52	44.941	-2.379	46.25
22.54	45.204	-2.398	46.536
22.56	45.556	-2.414	46.82
22.58	45.82	-2.428	47.102
22.6	45.996	-2.443	47.383
22.62	46.347	-2.464	47.662
22.64	46.83	-2.488	47.938
22.66	46.874	-2.511	48.213
22.68	47.226	-2.538	48.486
22.7	47.578	-2.564	48.757
22.72	47.841	-2.588	49.026
22.74	48.149	-2.61	49.294
22.76	48.325	-2.631	49.559
22.78	48.676	-2.656	49.822
22.8	48.896	-2.682	50.083
22.82	49.16	-2.708	50.343
22.84	49.555	-2.736	50.6
22.86	49.819	-2.764	50.855
22.88	50.038	-2.795	51.109
22.9	50.258	-2.828	51.36
22.92	50.566	-2.861	51.609
22.94	50.786	-2.89	51.857
22.96	51.093	-2.914	52.102
22.98	51.357	-2.936	52.345
23	51.533	-2.956	52.586
23.02	51.752	-2.98	52.825
23.04	52.148	-3.01	53.062
23.06	52.324	-3.043	53.297
23.08	52.412	-3.078	53.53
23.1	52.807	-3.119	53.76
23.12	52.983	-3.16	53.989
23.14	53.246	-3.201	54.215
23.16	53.378	-3.236	54.439
23.18	53.774	-3.263	54.661
23.2	53.774	-3.276	54.881
23.22	54.301	-3.288	55.099
23.24	54.389	-3.295	55.315
23.26	54.829	-3.305	55.528
23.28	55.092	-3.316	55.739
23.3	55.18	-3.33	55.948
23.32	55.4	-3.349	56.155
23.34	55.532	-3.368	56.36
23.36	55.795	-3.385	56.562
23.38	55.927	-3.399	56.762
23.4	56.147	-3.415	56.96
23.42	56.323	-3.435	57.156
23.44	56.367	-3.457	57.349
23.46	56.674	-3.485	57.54
23.48	56.85	-3.511	57.729
23.5	57.114	-3.535	57.915
23.52	57.158	-3.55	58.1
23.54	57.553	-3.565	58.282
23.56	57.773	-3.583	58.461
23.58	57.861	-3.608	58.639
23.6	58.212	-3.644	58.814
23.62	58.52	-3.683	58.986
23.64	58.564	-3.722	59.157
23.66	58.696	-3.761	59.325
23.68	58.784	-3.796	59.491
23.7	59.135	-3.826	59.654
23.72	59.311	-3.847	59.815
23.74	59.531	-3.864	59.974
23.76	59.794	-3.882	60.13
23.78	59.794	-3.903	60.284
23.8	59.882	-3.932	60.435
23.82	60.058	-3.965	60.585
23.84	60.102	-4	60.731
23.86	60.278	-4.037	60.876
23.88	60.366	-4.075	61.018
23.9	60.585	-4.114	61.157
23.92	60.805	-4.151	61.294
23.94	60.893	-4.183	61.429
23.96	61.025	-4.215	61.561
23.98	61.332	-4.247	61.691
24	61.376	-4.277	61.819
24.02	61.376	-4.308	61.944
24.04	61.684	-4.346	62.066
24.06	61.684	-4.387	62.186
24.08	61.86	-4.437	62.304
24.1	62.036	-4.493	62.419
24.12	62.123	-4.548	62.532
24.14	62.299	-4.601	62.642
24.16	62.519	-4.65	62.75
24.18	62.607	-4.696	62.855
24.2	62.651	-4.742	62.958
24.22	62.739	-4.788	63.058
24.24	62.871	-4.834	63.156
24.26	62.871	-4.873	63.251
24.28	62.914	-4.905	63.344
24.3	63.09	-4.929	63.435
24.32	63.178	-4.951	63.522
24.34	63.266	-4.975	63.608
24.36	63.486	-5.002	63.691
24.38	63.53	-5.025	63.771
24.4	63.705	-5.043	63.849
24.42	63.749	-5.054	63.924
24.44	63.793	-5.059	63.997
24.46	63.881	-5.058	64.067
24.48	63.969	-5.052	64.135
24.5	64.101	-5.049	64.2
24.52	64.189	-5.058	64.262
24.54	64.233	-5.077	64.322
24.56	64.365	-5.101	64.38
24.58	64.365	-5.121	64.435
24.6	64.409	-5.139	64.487
24.62	64.496	-5.155	64.537
24.64	64.496	-5.166	64.585
24.66	64.584	-5.171	64.63
24.68	64.584	-5.166	64.672
24.7	64.672	-5.155	64.712
24.72	64.672	-5.142	64.749
24.74	64.848	-5.134	64.783
24.76	64.848	-5.129	64.815
24.78	64.936	-5.126	64.845
24.8	64.98	-5.121	64.872
24.82	64.98	-5.114	64.896
24.84	64.98	-5.105	64.918
24.86	64.98	-5.095	64.937
24.88	65.112	-5.085	64.954
24.9	65.156	-5.075	64.968
24.92	65.156	-5.066	64.979
24.94	65.156	-5.059	64.988
24.96	65.156	-5.054	64.995
24.98	65.156	-5.054	64.999
25	65.156	-5.056	65
25.02	65.156	-5.049	64.999
25.04	65.156	-5.025	64.995
25.06	65.112	-4.985	64.988
25.08	65.112	-4.94	64.979
25.1	65.112	-4.9	64.968
25.12	65.112	-4.866	64.954
25.14	65.2	-4.835	64.937
25.16	65.2	-4.801	64.918
25.18	65.2	-4.767	64.896
25.2	65.2	-4.737	64.872
25.22	65.2	-4.71	64.845
25.24	65.2	-4.679	64.815
25.26	65.2	-4.642	64.783
25.28	65.156	-4.6	64.749
25.3	65.112	-4.56	64.712
25.32	65.068	-4.523	64.672
25.34	65.068	-4.484	64.63
25.36	64.98	-4.441	64.585
25.38	64.98	-4.402	64.537
25.4	64.936	-4.372	64.487
25.42	64.892	-4.348	64.435
25.44	64.716	-4.326	64.38
25.46	64.716	-4.308	64.322
25.48	64.672	-4.291	64.262
25.5	64.584	-4.271	64.2
25.52	64.584	-4.25	64.135
25.54	64.496	-4.225	64.067
25.56	64.453	-4.197	63.997
25.58	64.453	-4.164	63.924
25.6	64.409	-4.128	63.849
25.62	64.365	-4.095	63.771
25.64	64.189	-4.066	63.691
25.66	64.145	-4.039	63.608
25.68	64.145	-4.013	63.522
25.7	64.057	-3.988	63.435
25.72	64.057	-3.964	63.344
25.74	63.925	-3.938	63.251
25.76	63.793	-3.909	63.156
25.78	63.705	-3.879	63.058
25.8	63.618	-3.843	62.958
25.82	63.618	-3.801	62.855
25.84	63.486	-3.753	62.75
25.86	63.354	-3.71	62.642
25.88	63.222	-3.673	62.532
25.9	63.046	-3.638	62.419
25.92	63.046	-3.604	62.304
25.94	62.958	-3.57	62.186
25.96	62.695	-3.533	62.066
25.98	62.563	-3.495	61.944
26	62.519	-3.457	61.819
26.02	62.475	-3.42	61.691
26.04	62.255	-3.384	61.561
26.06	62.211	-3.352	61.429
26.08	61.948	-3.318	61.294
26.1	61.904	-3.284	61.157
26.12	61.816	-3.246	61.018
26.14	61.64	-3.205	60.876
26.16	61.596	-3.165	60.731
26.18	61.508	-3.131	60.585
26.2	61.288	-3.102	60.435
26.22	61.245	-3.075	60.284
26.24	61.113	-3.042	60.13
26.26	61.113	-3.009	59.974
26.28	60.849	-2.974	59.815
26.3	60.673	-2.939	59.654
26.32	60.41	-2.9	59.491
26.34	60.366	-2.86	59.325
26.36	60.146	-2.82	59.157
26.38	59.882	-2.782	58.986
26.4	59.794	-2.745	58.814
26.42	59.619	-2.705	58.639
26.44	59.487	-2.663	58.461
26.46	59.223	-2.619	58.282
26.48	59.135	-2.573	58.1
26.5	58.784	-2.52	57.915
26.52	58.696	-2.469	57.729
26.54	58.52	-2.424	57.54
26.56	58.256	-2.383	57.349
26.58	58.168	-2.346	57.156
26.6	58.037	-2.309	56.96
26.62	57.993	-2.273	56.762
26.64	57.597	-2.238	56.562
26.66	57.509	-2.209	56.36
26.68	57.333	-2.181	56.155
26.7	57.202	-2.157	55.948
26.72	56.938	-2.136	55.739
26.74	56.674	-2.118	55.528
26.76	56.498	-2.103	55.315
26.78	56.367	-2.085	55.099
26.8	56.015	-2.062	54.881
26.82	55.795	-2.036	54.661
26.84	55.663	-2.007	54.439
26.86	55.356	-1.974	54.215
26.88	55.312	-1.944	53.989
26.9	54.96	-1.914	53.76
26.92	54.829	-1.89	53.53
26.94	54.389	-1.866	53.297
26.96	54.257	-1.845	53.062
26.98	54.257	-1.822	52.825
27	53.818	-1.792	52.586
27.02	53.554	-1.762	52.345
27.04	53.29	-1.735	52.102
27.06	53.203	-1.712	51.857
27.08	53.071	-1.691	51.609
27.1	52.675	-1.667	51.36
27.12	52.587	-1.644	51.109
27.14	52.192	-1.617	50.855
27.16	52.016	-1.593	50.6
27.18	51.708	-1.571	50.343
27.2	51.489	-1.551	50.083
27.22	51.137	-1.528	49.822
27.24	50.917	-1.505	49.559
27.26	50.873	-1.482	49.294
27.28	50.478	-1.456	49.026
27.3	50.126	-1.431	48.757
27.32	49.951	-1.409	48.486
27.34	49.599	-1.387	48.213
27.36	49.511	-1.369	47.938
27.38	49.204	-1.348	47.662
27.4	48.808	-1.327	47.383
27.42	48.544	-1.305	47.102
27.44	48.369	-1.284	46.82
27.46	47.885	-1.263	46.536
27.48	47.621	-1.245	46.25
27.5	47.534	-1.228	45.962
27.52	47.27	-1.208	45.672
27.54	46.962	-1.185	45.381
27.56	46.699	-1.161	45.087
27.58	46.391	-1.137	44.792
27.6	45.864	-1.113	44.496
27.62	45.864	-1.093	44.197
27.64	45.556	-1.071	43.897
27.66	45.029	-1.046	43.595
27.68	44.941	-1.027	43.291
27.7	44.501	-1.007	42.985
27.72	44.194	-0.992	42.678
27.74	43.974	-0.979	42.369
27.76	43.535	-0.965	42.059
27.78	43.095	-0.949	41.746
27.8	43.007	-0.933	41.433
27.82	42.612	-0.911	41.117
27.84	42.26	-0.887	40.8
27.86	42.172	-0.868	40.481
27.88	41.865	-0.851	40.161
27.9	41.425	-0.838	39.839
27.92	41.249	-0.827	39.515
27.94	41.118	-0.814	39.19
27.96	40.634	-0.796	38.864
27.98	40.327	-0.775	38.536
28	39.975	-0.751	38.206
28.02	39.667	-0.73	37.875
28.04	39.228	-0.71	37.542
28.06	39.096	-0.695	37.208
28.08	38.569	-0.679	36.872
28.1	38.261	-0.664	36.535
28.12	38.085	-0.65	36.197
28.14	37.514	-0.633	35.857
28.16	37.119	-0.616	35.516
28.18	36.855	-0.6	35.173
28.2	36.459	-0.584	34.829
28.22	36.152	-0.57	34.483
28.24	35.844	-0.556	34.136
28.26	35.493	-0.541	33.788
28.28	35.317	-0.527	33.439
28.3	34.921	-0.511	33.088
28.32	34.482	-0.497	32.736
28.34	34.394	-0.488	32.382
28.36	33.998	-0.48	32.027
28.38	33.559	-0.471	31.671
28.4	33.163	-0.462	31.314
28.42	32.988	-0.453	30.955
28.44	32.46	-0.441	30.596
28.46	32.065	-0.429	30.235
28.48	31.581	-0.414	29.873
28.5	31.186	-0.395	29.509
28.52	30.922	-0.372	29.145
28.54	30.615	-0.344	28.779
28.56	30.307	-0.313	28.413
28.58	29.868	-0.281	28.045
28.6	29.472	-0.249	27.676
28.62	29.033	-0.221	27.306
28.64	28.725	-0.199	26.934
28.66	28.417	-0.185	26.562
28.68	28.11	-0.176	26.189
28.7	27.758	-0.168	25.815
28.72	27.451	-0.161	25.439
28.74	27.055	-0.153	25.063
28.76	26.704	-0.145	24.686
28.78	26.176	-0.136	24.307
28.8	25.825	-0.127	23.928
28.82	25.517	-0.114	23.548
28.84	25.165	-0.099	23.167
28.86	24.814	-0.081	22.785
28.88	24.374	-0.063	22.402
28.9	23.979	-0.048	22.018
28.92	23.583	-0.034	21.633
28.94	23.364	-0.016	21.248
28.96	22.88	0.009	20.861
28.98	22.441	0.037	20.474
29	22.045	0.062	20.086
29.02	21.562	0.078	19.697
29.04	21.342	0.084	19.308
29.06	20.727	0.088	18.917
29.08	20.507	0.091	18.526
29.1	20.024	0.095	18.134
29.12	19.672	0.096	17.742
29.14	19.277	0.094	17.349
29.16	18.925	0.087	16.955
29.18	18.618	0.079	16.56
29.2	18.134	0.07	16.165
29.22	17.739	0.062	15.769
29.24	17.211	0.056	15.372
29.26	16.992	0.05	14.975
29.28	16.552	0.047	14.578
29.3	16.201	0.044	14.179
29.32	15.893	0.044	13.78
29.34	15.278	0.046	13.381
29.36	14.97	0.047	12.981
29.38	14.487	0.045	12.581
29.4	14.267	0.043	12.18
29.42	13.915	0.043	11.778
29.44	13.168	0.05	11.376
29.46	13.08	0.058	10.974
29.48	12.685	0.068	10.571
29.5	12.246	0.076	10.168
29.52	11.938	0.084	9.765
29.54	11.498	0.093	9.361
29.56	11.191	0.1	8.956
29.58	10.707	0.104	8.552
29.6	10.356	0.105	8.147
29.62	9.697	0.103	7.741
29.64	9.301	0.099	7.336
29.66	8.906	0.094	6.93
29.68	8.554	0.09	6.524
29.7	8.159	0.087	6.117
29.72	7.587	0.085	5.71
29.74	7.368	0.084	5.303
29.76	6.928	0.083	4.896
29.78	6.401	0.081	4.489
29.8	5.961	0.08	4.081
29.82	5.61	0.081	3.674
29.84	5.258	0.084	3.266
29.86	4.819	0.092	2.858
29.88	4.335	0.102	2.45
29.9	4.028	0.112	2.042
29.92	3.632	0.119	1.633
29.94	3.281	0.122	1.225
29.96	2.841	0.125	0.817
29.98	2.446	0.129	0.408
30	2.094	0.133	0
30.02	1.611	0.139	-0.408
30.04	1.171	0.147	-0.817
30.06	0.908	0.157	-1.225
30.08	0.424	0.168	-1.633
30.1	0.073	0.177	-2.042
30.12	-0.323	0.184	-3.015
30.14	-0.85	0.191	-3.517
30.16	-1.29	0.201	-4.02
30.18	-1.641	0.212	-4.521
30.2	-2.037	0.221	-5.023
30.22	-2.652	0.228	-5.525
30.24	-3.047	0.237	-6.026
30.26	-3.751	0.251	-6.527
30.28	-4.102	0.27	-7.028
30.3	-4.937	0.289	-7.529
30.32	-5.421	0.306	-8.029
30.34	-6.124	0.318	-8.529
30.36	-6.651	0.326	-9.029
30.38	-7.134	0.334	-9.528
30.4	-7.75	0.344	-10.027
30.42	-8.365	0.355	-10.525
30.44	-8.892	0.361	-11.023
30.46	-9.2	0.36	-11.521
30.48	-9.815	0.358	-12.018
30.5	-10.254	0.36	-12.515
30.52	-10.606	0.368	-13.011
30.54	-11.133	0.377	-13.507
30.56	-11.661	0.383	-14.002
30.58	-12.144	0.389	-14.496
30.6	-12.628	0.397	-14.991
30.62	-13.111	0.41	-15.484
30.64	-13.638	0.424	-15.977
30.66	-13.946	0.438	-16.469
30.68	-14.473	0.452	-16.961
30.7	-15.001	0.467	-17.451
30.72	-15.44	0.481	-17.942
30.74	-15.879	0.495	-18.431
30.76	-16.363	0.506	-18.92
30.78	-16.89	0.516	-19.408
30.8	-17.33	0.525	-19.895
30.82	-17.945	0.534	-20.382
30.84	-18.56	0.545	-20.867
30.86	-18.912	0.559	-21.352
30.88	-19.439	0.574	-21.836
30.9	-20.01	0.588	-22.319
30.92	-20.494	0.6	-22.802
30.94	-21.021	0.61	-23.283
30.96	-21.461	0.621	-23.763
30.98	-21.9	0.634	-24.243
31	-22.471	0.647	-24.721
31.02	-22.999	0.659	-25.199
31.04	-23.57	0.669	-25.675
31.06	-23.921	0.679	-26.151
31.08	-24.405	0.689	-26.626
31.1	-24.932	0.7	-27.099
31.12	-25.46	0.712	-27.571
31.14	-25.899	0.726	-28.043
31.16	-26.382	0.741	-28.513
31.18	-26.822	0.755	-28.982
31.2	-27.393	0.766	-29.45
31.22	-27.833	0.772	-29.917
31.24	-28.184	0.775	-30.382
31.26	-28.712	0.775	-30.847
31.28	-29.151	0.776	-31.31
31.3	-29.678	0.781	-31.772
31.32	-30.162	0.79	-32.233
31.34	-30.513	0.803	-32.692
31.36	-31.085	0.814	-33.15
31.38	-31.48	0.823	-33.607
31.4	-31.963	0.828	-34.062
31.42	-32.403	0.832	-34.516
31.44	-32.886	0.831	-34.969
31.46	-33.37	0.829	-35.421
31.48	-33.765	0.827	-35.871
31.5	-34.293	0.829	-36.319
31.52	-34.732	0.837	-36.766
31.54	-35.171	0.847	-37.212
31.56	-35.655	0.851	-37.656
31.58	-36.182	0.847	-38.099
31.6	-36.578	0.839	-38.54
31.62	-37.017	0.829	-38.98
31.64	-37.457	0.823	-39.418
31.66	-37.94	0.819	-39.855
31.68	-38.379	0.817	-40.29
31.7	-38.819	0.816	-40.723
31.72	-39.258	0.816	-41.155
31.74	-39.742	0.817	-41.585
31.76	-40.137	0.823	-42.014
31.78	-40.577	0.834	-42.441
31.8	-41.016	0.852	-42.866
31.82	-41.412	0.873	-43.29
31.84	-41.763	0.889	-43.712
31.86	-42.291	0.893	-44.132
31.88	-42.642	0.89	-44.55
31.9	-43.126	0.883	-44.967
31.92	-43.565	0.877	-45.382
31.94	-43.961	0.874	-45.795
31.96	-44.356	0.873	-46.206
31.98	-44.839	0.872	-46.615
32	-45.235	0.871	-47.023
32.02	-45.718	0.867	-47.429
32.04	-46.114	0.858	-47.832
32.06	-46.553	0.843	-48.234
32.08	-46.905	0.827	-48.634
32.1	-47.344	0.812	-49.033
32.12	-47.74	0.8	-49.429
32.14	-48.135	0.789	-49.823
32.16	-48.531	0.778	-50.215
32.18	-48.926	0.768	-50.606
32.2	-49.322	0.766	-50.994
32.22	-49.717	0.773	-51.38
32.24	-50.069	0.786	-51.764
32.26	-50.508	0.797	-52.147
32.28	-50.86	0.803	-52.527
32.3	-51.212	0.805	-52.905
32.32	-51.695	0.806	-53.281
32.34	-52.09	0.81	-53.655
32.36	-52.442	0.817	-54.027
32.38	-52.881	0.824	-54.396
32.4	-53.189	0.832	-54.764
32.42	-53.585	0.838	-55.129
32.44	-53.98	0.843	-55.492
32.46	-54.288	0.844	-55.853
32.48	-54.683	0.839	-56.212
32.5	-55.035	0.829	-56.569
32.52	-55.474	0.817	-56.923
32.54	-55.782	0.808	-57.275
32.56	-56.133	0.802	-57.625
32.58	-56.573	0.796	-57.972
32.6	-56.837	0.79	-58.317
32.62	-57.232	0.78	-58.66
32.64	-57.584	0.769	-59.001
32.66	-57.935	0.762	-59.339
32.68	-58.243	0.76	-59.675
32.7	-58.594	0.761	-60.009
32.72	-58.99	0.762	-60.34
32.74	-59.297	0.763	-60.669
32.76	-59.649	0.764	-60.995
32.78	-59.957	0.766	-61.319
32.8	-60.396	0.769	-61.641
32.82	-60.616	0.776	-61.96
32.84	-60.967	0.785	-62.277
32.86	-61.275	0.798	-62.591
32.88	-61.671	0.813	-62.903
32.9	-61.934	0.832	-63.212
32.92	-62.33	0.849	-63.519
32.94	-62.637	0.864	-63.824
32.96	-62.989	0.876	-64.125
32.98	-63.253	0.883	-64.425
33	-63.604	0.887	-64.721
33.02	-63.78	0.891	-65.016
33.04	-64.088	0.898	-65.307
33.06	-64.483	0.91	-65.596
33.08	-64.747	0.929	-65.883
33.1	-64.966	0.952	-66.166
33.12	-65.318	0.974	-66.448
33.14	-65.582	0.993	-66.726
33.16	-65.889	1.009	-67.002
33.18	-66.197	1.025	-67.276
33.2	-66.461	1.043	-67.546
33.22	-66.768	1.059	-67.814
33.24	-67.032	1.073	-68.08
33.26	-67.296	1.085	-68.342
33.28	-67.603	1.099	-68.602
33.3	-67.867	1.122	-68.859
33.32	-68.13	1.158	-69.114
33.34	-68.438	1.203	-69.366
33.36	-68.658	1.251	-69.615
33.38	-68.965	1.292	-69.861
33.4	-69.141	1.329	-70.105
33.42	-69.493	1.363	-70.345
33.44	-69.669	1.4	-70.583
33.46	-69.844	1.44	-70.819
33.48	-70.196	1.479	-71.051
33.5	-70.372	1.522	-71.281
33.52	-70.591	1.569	-71.507
33.54	-70.811	1.621	-71.731
33.56	-70.987	1.678	-71.952
33.58	-71.382	1.732	-72.171
33.6	-71.558	1.788	-72.386
33.62	-71.778	1.841	-72.599
33.64	-72.042	1.894	-72.808
33.66	-72.261	1.948	-73.015
33.68	-72.437	2.002	-73.219
33.7	-72.701	2.052	-73.42
33.72	-72.964	2.099	-73.619
33.74	-73.096	2.143	-73.814
33.76	-73.316	2.184	-74.006
33.78	-73.536	2.224	-74.196
33.8	-73.58	2.262	-74.382
33.82	-73.931	2.294	-74.566
33.84	-74.151	2.325	-74.746
33.86	-74.239	2.358	-74.924
33.88	-74.503	2.391	-75.099
33.9	-74.722	2.427	-75.27
33.92	-74.854	2.466	-75.439
33.94	-75.03	2.503	-75.605
33.96	-75.118	2.54	-75.768
33.98	-75.338	2.575	-75.928
34	-75.557	2.609	-76.085
34.02	-75.645	2.644	-76.238
34.04	-75.777	2.68	-76.389
34.06	-76.129	2.716	-76.537
34.08	-76.172	2.755	-76.682
34.1	-76.436	2.79	-76.823
34.12	-76.568	2.823	-76.962
34.14	-76.788	2.855	-77.098
34.16	-76.832	2.892	-77.231
34.18	-76.963	2.934	-77.36
34.2	-77.183	2.976	-77.487
34.22	-77.359	3.017	-77.61
34.24	-77.447	3.055	-77.731
34.26	-77.491	3.09	-77.848
34.28	-77.754	3.121	-77.962
34.3	-77.754	3.15	-78.073
34.32	-77.886	3.174	-78.181
34.34	-77.93	3.193	-78.286
34.36	-78.018	3.209	-78.388
34.38	-78.194	3.223	-78.487
34.4	-78.238	3.238	-78.583
34.42	-78.326	3.254	-78.676
34.44	-78.546	3.266	-78.765
34.46	-78.677	3.277	-78.852
34.48	-78.677	3.288	-78.935
34.5	-78.809	3.298	-79.015
34.52	-78.897	3.31	-79.092
34.54	-79.073	3.323	-79.166
34.56	-79.117	3.343	-79.237
34.58	-79.161	3.366	-79.305
34.6	-79.293	3.387	-79.369
34.62	-79.38	3.4	-79.431
34.64	-79.512	3.404	-79.489
34.66	-79.6	3.406	-79.544
34.68	-79.644	3.41	-79.596
34.7	-79.644	3.417	-79.645
34.72	-79.688	3.424	-79.691
34.74	-79.732	3.43	-79.733
34.76	-79.776	3.436	-79.773
34.78	-79.776	3.441	-79.809
34.8	-79.864	3.443	-79.842
34.82	-79.908	3.443	-79.872
34.84	-79.908	3.442	-79.899
34.86	-79.952	3.442	-79.923
34.88	-80.04	3.442	-79.943
34.9	-80.084	3.444	-79.961
34.92	-80.128	3.444	-79.975
34.94	-80.171	3.44	-79.986
34.96	-80.215	3.433	-79.994
34.98	-80.215	3.428	-79.998
35	-80.215	3.428	-80
35.02	-80.215	3.429	-79.998
35.04	-80.215	3.427	-79.994
35.06	-80.215	3.422	-79.986
35.08	-80.215	3.416	-79.975
35.1	-80.215	3.41	-79.961
35.12	-80.215	3.406	-79.943
35.14	-80.259	3.401	-79.923
35.16	-80.259	3.395	-79.899
35.18	-80.259	3.385	-79.872
35.2	-80.259	3.37	-79.842
35.22	-80.259	3.348	-79.809
35.24	-80.215	3.324	-79.773
35.26	-80.171	3.298	-79.733
35.28	-80.171	3.272	-79.691
35.3	-80.04	3.248	-79.645
35.32	-79.996	3.229	-79.596
35.34	-79.952	3.213	-79.544
35.36	-79.908	3.2	-79.489
35.38	-79.82	3.187	-79.431
35.4	-79.776	3.174	-79.369
35.42	-79.688	3.165	-79.305
35.44	-79.688	3.156	-79.237
35.46	-79.644	3.147	-79.166
35.48	-79.6	3.136	-79.092
35.5	-79.6	3.124	-79.015
35.52	-79.468	3.113	-78.935
35.54	-79.424	3.104	-78.852
35.56	-79.38	3.095	-78.765
35.58	-79.337	3.085	-78.676
35.6	-79.293	3.07	-78.583
35.62	-79.161	3.052	-78.487
35.64	-79.161	3.032	-78.388
35.66	-78.985	3.015	-78.286
35.68	-78.985	2.998	-78.181
35.7	-78.941	2.979	-78.073
35.72	-78.677	2.959	-77.962
35.74	-78.677	2.936	-77.848
35.76	-78.589	2.913	-77.731
35.78	-78.282	2.892	-77.61
35.8	-78.282	2.866	-77.487
35.82	-78.15	2.839	-77.36
35.84	-78.018	2.811	-77.231
35.86	-77.93	2.78	-77.098
35.88	-77.798	2.746	-76.962
35.9	-77.579	2.71	-76.823
35.92	-77.579	2.673	-76.682
35.94	-77.447	2.639	-76.537
35.96	-77.315	2.604	-76.389
35.98	-77.051	2.567	-76.238
36	-77.007	2.525	-76.085
36.02	-76.788	2.485	-75.928
36.04	-76.656	2.446	-75.768
36.06	-76.436	2.409	-75.605
36.08	-76.348	2.371	-75.439
36.1	-76.172	2.335	-75.27
36.12	-76.129	2.3	-75.099
36.14	-75.909	2.27	-74.924
36.16	-75.821	2.241	-74.746
36.18	-75.689	2.217	-74.566
36.2	-75.513	2.195	-74.382
36.22	-75.381	2.172	-74.196
36.24	-75.206	2.149	-74.006
36.26	-74.854	2.124	-73.814
36.28	-74.766	2.094	-73.619
36.3	-74.503	2.064	-73.42
36.32	-74.283	2.03	-73.219
36.34	-74.107	1.992	-73.015
36.36	-73.887	1.954	-72.808
36.38	-73.668	1.918	-72.599
36.4	-73.624	1.888	-72.386
36.42	-73.272	1.869	-72.171
36.44	-73.14	1.852	-71.952
36.46	-73.008	1.835	-71.731
36.48	-72.745	1.814	-71.507
36.5	-72.569	1.788	-71.281
36.52	-72.437	1.759	-71.051
36.54	-72.173	1.73	-70.819
36.56	-71.91	1.698	-70.583
36.58	-71.69	1.664	-70.345
36.6	-71.338	1.632	-70.105
36.62	-71.119	1.598	-69.861
36.64	-70.811	1.567	-69.615
36.66	-70.547	1.539	-69.366
36.68	-70.416	1.512	-69.114
36.7	-70.196	1.487	-68.859
36.72	-69.976	1.46	-68.602
36.74	-69.756	1.43	-68.342
36.76	-69.493	1.4	-68.08
36.78	-69.317	1.372	-67.814
36.8	-68.921	1.348	-67.546
36.82	-68.746	1.324	-67.276
36.84	-68.57	1.3	-67.002
36.86	-68.174	1.278	-66.726
36.88	-67.911	1.254	-66.448
36.9	-67.603	1.23	-66.166
36.92	-67.427	1.202	-65.883
36.94	-66.988	1.176	-65.596
36.96	-66.812	1.147	-65.307
36.98	-66.548	1.122	-65.016
37	-66.285	1.099	-64.721
37.02	-65.889	1.077	-64.425
37.04	-65.67	1.054	-64.125
37.06	-65.406	1.031	-63.824
37.08	-65.098	1.009	-63.519
37.1	-64.835	0.989	-63.212
37.12	-64.483	0.97	-62.903
37.14	-64.219	0.95	-62.591
37.16	-63.912	0.93	-62.277
37.18	-63.56	0.911	-61.96
37.2	-63.34	0.891	-61.641
37.22	-63.033	0.872	-61.319
37.24	-62.637	0.857	-60.995
37.26	-62.33	0.843	-60.669
37.28	-62.022	0.83	-60.34
37.3	-61.758	0.817	-60.009
37.32	-61.363	0.803	-59.675
37.34	-61.099	0.786	-59.339
37.36	-60.748	0.769	-59.001
37.38	-60.396	0.75	-58.66
37.4	-60.045	0.729	-58.317
37.42	-59.737	0.706	-57.972
37.44	-59.385	0.684	-57.625
37.46	-59.078	0.664	-57.275
37.48	-58.77	0.65	-56.923
37.5	-58.287	0.643	-56.569
37.52	-58.111	0.636	-56.212
37.54	-57.715	0.63	-55.853
37.56	-57.364	0.621	-55.492
37.58	-56.924	0.611	-55.129
37.6	-56.573	0.598	-54.764
37.62	-56.221	0.586	-54.396
37.64	-55.826	0.578	-54.027
37.66	-55.43	0.573	-53.655
37.68	-55.079	0.568	-53.281
37.7	-54.771	0.563	-52.905
37.72	-54.288	0.557	-52.527
37.74	-54.024	0.549	-52.147
37.76	-53.629	0.543	-51.764
37.78	-53.277	0.539	-51.38
37.8	-53.057	0.532	-50.994
37.82	-52.618	0.523	-50.606
37.84	-52.266	0.509	-50.215
37.86	-51.959	0.492	-49.823
37.88	-51.519	0.478	-49.429
37.9	-51.08	0.466	-49.033
37.92	-50.64	0.457	-48.634
37.94	-50.245	0.449	-48.234
37.96	-49.893	0.44	-47.832
37.98	-49.366	0.433	-47.429
38	-49.058	0.425	-47.023
38.02	-48.663	0.419	-46.615
38.04	-48.179	0.413	-46.206
38.06	-47.828	0.403	-45.795
38.08	-47.388	0.393	-45.382
38.1	-47.037	0.384	-44.967
38.12	-46.641	0.381	-44.55
38.14	-46.246	0.38	-44.132
38.16	-45.85	0.379	-43.712
38.18	-45.499	0.374	-43.29
38.2	-45.191	0.365	-42.866
38.22	-44.752	0.356	-42.441
38.24	-44.356	0.35	-42.014
38.26	-43.961	0.346	-41.585
38.28	-43.521	0.342	-41.155
38.3	-43.126	0.334	-40.723
38.32	-42.642	0.322	-40.29
38.34	-42.203	0.308	-39.855
38.36	-41.675	0.299	-39.418
38.38	-41.192	0.295	-38.98
38.4	-40.753	0.296	-38.54
38.42	-40.269	0.298	-38.099
38.44	-39.742	0.3	-37.656
38.46	-39.258	0.297	-37.212
38.48	-38.907	0.288	-36.766
38.5	-38.423	0.276	-36.319
38.52	-37.896	0.265	-35.871
38.54	-37.545	0.255	-35.421
38.56	-37.193	0.246	-34.969
38.58	-36.754	0.238	-34.516
38.6	-36.314	0.23	-34.062
38.62	-35.875	0.225	-33.607
38.64	-35.435	0.224	-33.15
38.66	-34.952	0.223	-32.692
38.68	-34.556	0.218	-32.233
38.7	-34.117	0.21	-31.772
38.72	-33.589	0.203	-31.31
38.74	-33.15	0.196	-30.847
38.76	-32.754	0.187	-30.382
38.78	-32.227	0.176	-29.917
38.8	-31.788	0.163	-29.45
38.82	-31.304	0.151	-28.982
38.84	-30.865	0.143	-28.513
38.86	-30.425	0.137	-28.043
38.88	-29.898	0.129	-27.571
38.9	-29.415	0.118	-27.099
38.92	-28.975	0.103	-26.626
38.94	-28.58	0.087	-26.151
38.96	-28.096	0.071	-25.675
38.98	-27.481	0.057	-25.199
39	-27.086	0.043	-24.721
39.02	-26.602	0.033	-24.243
39.04	-26.207	0.026	-23.763
39.06	-25.591	0.021	-23.283
39.08	-25.108	0.015	-22.802
39.1	-24.669	0.006	-22.319
39.12	-24.141	-0.006	-21.836
39.14	-23.702	-0.021	-21.352
39.16	-23.262	-0.036	-20.867
39.18	-22.823	-0.05	-20.382
39.2	-22.339	-0.059	-19.895
39.22	-21.812	-0.066	-19.408
39.24	-21.373	-0.072	-18.92
39.26	-20.933	-0.079	-18.431
39.28	-20.45	-0.088	-17.942
39.3	-19.879	-0.1	-17.451
39.32	-19.483	-0.115	-16.961
39.34	-18.956	-0.13	-16.469
39.36	-18.56	-0.144	-15.977
39.38	-17.857	-0.154	-15.484
39.4	-17.374	-0.164	-14.991
39.42	-16.846	-0.173	-14.496
39.44	-16.451	-0.184	-14.002
39.46	-15.836	-0.195	-13.507
39.48	-15.396	-0.205	-13.011
39.5	-14.869	-0.21	-12.515
39.52	-14.429	-0.212	-12.018
39.54	-14.034	-0.215	-11.521
39.56	-13.419	-0.222	-11.023
39.58	-13.023	-0.232	-10.525
39.6	-12.584	-0.242	-10.027
39.62	-11.968	-0.25	-9.528
39.64	-11.441	-0.257	-9.029
39.66	-11.002	-0.265	-8.529
39.68	-10.562	-0.272	-8.029
39.7	-9.991	-0.276	-7.529
39.72	-9.551	-0.277	-7.028
39.74	-8.936	-0.277	-6.527
39.76	-8.541	-0.282	-6.026
39.78	-8.013	-0.295	-5.525
39.8	-7.618	-0.312	-5.023
39.82	-7.046	-0.325	-4.521
39.84	-6.431	-0.331	-4.02
39.86	-5.948	-0.334	-3.517
39.88	-5.508	-0.339	-3.015
39.9	-5.069	-0.349	-2.513
39.92	-4.586	-0.359	-2.01
39.94	-3.882	-0.367	-1.508
39.96	-3.575	-0.373	-1.005
39.98	-3.047	-0.378	-0.503
[truncated: 7,999 more rows]
