# Supplementary material for: Interactive Compliance Control of a Wrist Rehabilitation Device (WReD) with Enhanced Training Safety
Source: J Healthc Eng. 2019 Feb 18;2019:6537848. doi: 10.1155/2019/6537848 (PMC6409001; doi:10.1155/2019/6537848)
Supplement: Supplementary Materials — The original data of Experiment 1 to Experiment 4 are included. The data file of each experiment contains four columns named Time (second), Desired Angle (degree), Interaction Torque (Nm), and Measured Angle (degree). Figures 4–7 were derived from the original data of Experiment 1 to Experiment 4 by using MATLAB. Below are the descriptions of the four experiments: Experiment 1: the trajectory tracking responses with zero load. Experiment 2: the trajectory tracking responses with passive training. Experiment 3: the trajectory tracking responses with K = 0.8. Experiment 4: the trajectory tracking responses with K = 1.6. [file 6537848.f1.zip › 6537848.f1/Experiment 3.xls]

## Sheet: Alldata_interaction
Time	Desired	Interaction Torque	Measured
0	0.248	0.544	0.68
0.02	0.248	0.533	1.075
0.04	0.248	0.49	1.429
0.06	0.292	0.381	1.702
0.08	0.292	0.199	1.882
0.1	0.424	-0.016	2.022
0.12	0.644	-0.194	2.207
0.14	0.732	-0.294	2.491
0.16	1.127	-0.321	2.864
0.18	1.259	-0.311	3.284
0.2	1.655	-0.292	3.717
0.22	2.094	-0.273	4.148
0.24	2.358	-0.259	4.573
0.26	2.665	-0.256	4.984
0.28	3.193	-0.267	5.376
0.3	3.588	-0.291	5.753
0.32	3.94	-0.319	6.124
0.34	4.291	-0.346	6.497
0.36	4.775	-0.37	6.873
0.38	5.214	-0.394	7.249
0.4	5.61	-0.421	7.62
0.42	5.961	-0.452	7.986
0.44	6.357	-0.488	8.346
0.46	7.06	-0.529	8.7
0.48	7.368	-0.573	9.049
0.5	7.763	-0.619	9.394
0.52	8.246	-0.666	9.739
0.54	8.598	-0.711	10.085
0.56	8.994	-0.754	10.434
0.58	9.301	-0.792	10.788
0.6	9.697	-0.827	11.146
0.62	9.96	-0.857	11.509
0.64	10.224	-0.887	11.872
0.66	10.576	-0.921	12.23
0.68	10.971	-0.958	12.583
0.7	11.191	-0.997	12.933
0.72	11.411	-1.035	13.284
0.74	11.982	-1.072	13.635
0.76	12.289	-1.105	13.991
0.78	12.597	-1.133	14.352
0.8	12.949	-1.159	14.716
0.82	13.212	-1.183	15.081
0.84	13.696	-1.21	15.442
0.86	13.871	-1.239	15.8
0.88	14.047	-1.27	16.154
0.9	14.531	-1.303	16.506
0.92	14.926	-1.334	16.859
0.94	15.234	-1.363	17.213
0.96	15.761	-1.391	17.569
0.98	16.157	-1.418	17.925
1	16.552	-1.443	18.282
1.02	16.992	-1.466	18.642
1.04	17.299	-1.485	19.005
1.06	17.827	-1.503	19.368
1.08	18.134	-1.519	19.734
1.1	18.618	-1.532	20.103
1.12	18.969	-1.539	20.478
1.14	19.189	-1.543	20.856
1.16	19.453	-1.55	21.23
1.18	20.024	-1.56	21.598
1.2	20.244	-1.572	21.964
1.22	20.463	-1.583	22.328
1.24	20.859	-1.595	22.692
1.26	21.254	-1.604	23.057
1.28	21.562	-1.613	23.422
1.3	21.738	-1.623	23.786
1.32	22.133	-1.635	24.145
1.34	22.704	-1.648	24.502
1.36	23.1	-1.659	24.86
1.38	23.408	-1.668	25.22
1.4	23.847	-1.677	25.579
1.42	24.33	-1.687	25.936
1.44	24.638	-1.698	26.29
1.46	24.814	-1.714	26.637
1.48	25.385	-1.737	26.974
1.5	25.869	-1.765	27.303
1.52	26.088	-1.794	27.63
1.54	26.484	-1.822	27.957
1.56	26.747	-1.847	28.287
1.58	27.363	-1.874	28.613
1.6	27.407	-1.901	28.937
1.62	27.714	-1.929	29.261
1.64	28.066	-1.949	29.59
1.66	28.417	-1.962	29.929
1.68	28.725	-1.971	30.272
1.7	29.077	-1.979	30.614
1.72	29.164	-1.986	30.956
1.74	29.604	-1.997	31.292
1.76	29.912	-2.009	31.625
1.78	30.131	-2.023	31.955
1.8	30.834	-2.04	32.279
1.82	30.922	-2.056	32.603
1.84	31.318	-2.075	32.922
1.86	31.669	-2.094	33.239
1.88	32.021	-2.115	33.554
1.9	32.372	-2.136	33.865
1.92	32.812	-2.16	34.173
1.94	33.207	-2.183	34.48
1.96	33.515	-2.205	34.786
1.98	33.779	-2.23	35.087
2	34.042	-2.26	35.38
2.02	34.394	-2.294	35.668
2.04	34.877	-2.328	35.954
2.06	34.921	-2.354	36.248
2.08	35.317	-2.378	36.544
2.1	35.449	-2.395	36.845
2.12	35.8	-2.411	37.148
2.14	36.108	-2.423	37.452
2.16	36.328	-2.434	37.758
2.18	36.459	-2.444	38.062
2.2	36.899	-2.46	38.358
2.22	37.162	-2.478	38.648
2.24	37.47	-2.498	38.936
2.26	37.778	-2.515	39.225
2.28	37.997	-2.532	39.514
2.3	38.349	-2.552	39.795
2.32	38.964	-2.58	40.065
2.34	39.052	-2.61	40.332
2.36	39.316	-2.644	40.592
2.38	39.492	-2.677	40.85
2.4	39.975	-2.709	41.109
2.42	40.458	-2.733	41.376
2.44	40.546	-2.747	41.653
2.46	40.898	-2.761	41.929
2.48	41.074	-2.778	42.2
2.5	41.469	-2.803	42.459
2.52	41.601	-2.83	42.712
2.54	42.04	-2.862	42.959
2.56	42.128	-2.891	43.206
2.58	42.392	-2.924	43.447
2.6	42.7	-2.96	43.682
2.62	42.787	-2.997	43.915
2.64	43.051	-3.035	44.144
2.66	43.227	-3.071	44.375
2.68	43.535	-3.103	44.607
2.7	43.798	-3.131	44.844
2.72	43.93	-3.155	45.082
2.74	44.106	-3.181	45.317
2.76	44.37	-3.209	45.547
2.78	44.677	-3.239	45.773
2.8	44.985	-3.271	45.995
2.82	45.161	-3.303	46.214
2.84	45.38	-3.337	46.429
2.86	45.82	-3.372	46.64
2.88	46.039	-3.405	46.852
2.9	46.083	-3.437	47.064
2.92	46.435	-3.472	47.269
2.94	46.83	-3.507	47.473
2.96	46.918	-3.537	47.68
2.98	47.006	-3.563	47.891
3	47.446	-3.59	48.098
3.02	47.49	-3.616	48.305
3.04	47.753	-3.65	48.499
3.06	47.841	-3.688	48.687
3.08	48.061	-3.724	48.875
3.1	48.237	-3.751	49.072
3.12	48.456	-3.769	49.278
3.14	48.676	-3.785	49.484
3.16	48.94	-3.805	49.683
3.18	49.028	-3.829	49.875
3.2	49.116	-3.859	50.058
3.22	49.204	-3.891	50.236
3.24	49.687	-3.926	50.407
3.26	49.775	-3.956	50.583
3.28	49.907	-3.984	50.76
3.3	50.302	-4.014	50.93
3.32	50.522	-4.046	51.097
3.34	50.566	-4.078	51.262
3.36	50.742	-4.108	51.427
3.38	50.786	-4.132	51.596
3.4	51.049	-4.154	51.768
3.42	51.137	-4.17	51.943
3.44	51.489	-4.187	52.115
3.46	51.577	-4.205	52.283
3.48	51.796	-4.226	52.446
3.5	51.884	-4.246	52.608
3.52	52.104	-4.263	52.771
3.54	52.368	-4.28	52.932
3.56	52.412	-4.297	53.09
3.58	52.455	-4.321	53.238
3.6	52.851	-4.354	53.371
3.62	52.939	-4.389	53.501
3.64	52.983	-4.418	53.635
3.66	53.115	-4.435	53.781
3.68	53.334	-4.444	53.936
3.7	53.378	-4.45	54.092
3.72	53.73	-4.467	54.232
3.74	53.774	-4.493	54.358
3.76	53.818	-4.529	54.468
3.78	53.906	-4.574	54.567
3.8	54.125	-4.623	54.657
3.82	54.213	-4.673	54.744
3.84	54.477	-4.725	54.825
3.86	54.565	-4.778	54.904
3.88	54.741	-4.829	54.981
3.9	54.829	-4.872	55.067
3.92	55.004	-4.904	55.164
3.94	55.18	-4.922	55.276
3.96	55.18	-4.932	55.396
3.98	55.18	-4.946	55.509
4	55.268	-4.969	55.607
4.02	55.356	-4.999	55.695
4.04	55.4	-5.026	55.784
4.06	55.532	-5.05	55.874
4.08	55.62	-5.075	55.96
4.1	55.663	-5.106	56.037
4.12	55.707	-5.141	56.105
4.14	55.839	-5.178	56.17
4.16	55.971	-5.213	56.233
4.18	56.015	-5.251	56.291
4.2	56.147	-5.295	56.339
4.22	56.191	-5.338	56.386
4.24	56.367	-5.376	56.436
4.26	56.367	-5.403	56.498
4.28	56.454	-5.423	56.566
4.3	56.454	-5.438	56.637
4.32	56.454	-5.452	56.707
4.34	56.63	-5.464	56.777
4.36	56.63	-5.473	56.85
4.38	56.674	-5.481	56.919
4.4	56.674	-5.492	56.984
4.42	56.762	-5.507	57.04
4.44	56.85	-5.527	57.088
4.46	56.982	-5.551	57.128
4.48	57.07	-5.58	57.16
4.5	57.158	-5.614	57.183
4.52	57.202	-5.65	57.199
4.54	57.202	-5.685	57.217
4.56	57.289	-5.712	57.24
4.58	57.333	-5.729	57.273
4.6	57.333	-5.741	57.311
4.62	57.333	-5.754	57.345
4.64	57.377	-5.771	57.371
4.66	57.509	-5.793	57.388
4.68	57.377	-5.812	57.407
4.7	57.465	-5.827	57.427
4.72	57.465	-5.836	57.454
4.74	57.553	-5.843	57.48
4.76	57.641	-5.852	57.5
4.78	57.685	-5.865	57.513
4.8	57.685	-5.879	57.523
4.82	57.685	-5.885	57.54
4.84	57.685	-5.874	57.575
4.86	57.685	-5.842	57.635
4.88	57.641	-5.788	57.718
4.9	57.641	-5.725	57.812
4.92	57.641	-5.665	57.899
4.94	57.729	-5.619	57.964
4.96	57.773	-5.594	58.002
4.98	57.773	-5.59	58.011
5	57.817	-5.605	57.994
5.02	57.817	-5.635	57.955
5.04	57.949	-5.68	57.895
5.06	58.08	-5.729	57.827
5.08	58.168	-5.772	57.765
5.1	58.256	-5.798	57.72
5.12	58.256	-5.806	57.696
5.14	58.256	-5.799	57.688
5.16	58.256	-5.778	57.696
5.18	58.037	-5.739	57.722
5.2	57.993	-5.686	57.764
5.22	57.949	-5.622	57.818
5.24	57.905	-5.555	57.871
5.26	57.861	-5.501	57.907
5.28	57.861	-5.469	57.912
5.3	57.817	-5.46	57.887
5.32	57.861	-5.465	57.84
5.34	57.861	-5.476	57.785
5.36	57.905	-5.488	57.725
5.38	57.905	-5.502	57.66
5.4	57.949	-5.519	57.588
5.42	57.949	-5.537	57.514
5.44	57.949	-5.548	57.445
5.46	57.905	-5.546	57.39
5.48	57.905	-5.526	57.355
5.5	57.861	-5.485	57.344
5.52	57.817	-5.425	57.354
5.54	57.773	-5.351	57.378
5.56	57.641	-5.272	57.407
5.58	57.553	-5.197	57.428
5.6	57.509	-5.13	57.437
5.62	57.509	-5.072	57.431
5.64	57.509	-5.024	57.411
5.66	57.509	-4.989	57.371
5.68	57.509	-4.969	57.311
5.7	57.509	-4.956	57.24
5.72	57.509	-4.94	57.169
5.74	57.509	-4.918	57.104
5.76	57.509	-4.89	57.043
5.78	57.509	-4.859	56.984
5.8	57.465	-4.821	56.932
5.82	57.377	-4.771	56.892
5.84	57.377	-4.709	56.863
5.86	57.289	-4.64	56.842
5.88	57.246	-4.572	56.817
5.9	57.202	-4.508	56.783
5.92	57.158	-4.454	56.736
5.94	56.938	-4.408	56.676
5.96	56.938	-4.372	56.602
5.98	56.894	-4.339	56.52
6	56.894	-4.307	56.434
6.02	56.762	-4.272	56.351
6.04	56.718	-4.236	56.267
6.06	56.718	-4.198	56.182
6.08	56.674	-4.159	56.096
6.1	56.674	-4.12	56.007
6.12	56.586	-4.079	55.919
6.14	56.454	-4.033	55.835
6.16	56.454	-3.983	55.753
6.18	56.367	-3.927	55.676
6.2	56.235	-3.868	55.601
6.22	56.191	-3.809	55.523
6.24	55.971	-3.75	55.443
6.26	55.927	-3.696	55.354
6.28	55.839	-3.646	55.258
6.3	55.795	-3.599	55.156
6.32	55.751	-3.549	55.054
6.34	55.532	-3.493	54.959
6.36	55.4	-3.434	54.864
6.38	55.356	-3.376	54.767
6.4	55.356	-3.319	54.665
6.42	55.092	-3.258	54.566
6.44	55.048	-3.199	54.462
6.46	55.004	-3.145	54.35
6.48	54.741	-3.099	54.226
6.5	54.741	-3.065	54.084
6.52	54.697	-3.033	53.937
6.54	54.653	-3	53.79
6.56	54.433	-2.965	53.642
6.58	54.301	-2.935	53.487
6.6	54.125	-2.91	53.323
6.62	54.081	-2.888	53.153
6.64	53.862	-2.862	52.985
6.66	53.818	-2.834	52.817
6.68	53.554	-2.801	52.654
6.7	53.466	-2.765	52.492
6.72	53.334	-2.728	52.33
6.74	53.203	-2.69	52.166
6.76	53.159	-2.653	51.999
6.78	53.027	-2.613	51.833
6.8	52.675	-2.568	51.672
6.82	52.455	-2.522	51.51
6.84	52.28	-2.475	51.345
6.86	52.28	-2.43	51.177
6.88	51.84	-2.382	51.011
6.9	51.752	-2.338	50.838
6.92	51.708	-2.298	50.657
6.94	51.489	-2.263	50.468
6.96	51.269	-2.235	50.269
6.98	51.005	-2.208	50.065
7	51.005	-2.182	49.859
7.02	50.786	-2.15	49.658
7.04	50.61	-2.113	49.46
7.06	50.258	-2.072	49.267
7.08	50.214	-2.033	49.068
7.1	49.907	-1.992	48.87
7.12	49.863	-1.955	48.665
7.14	49.687	-1.918	48.458
7.16	49.467	-1.881	48.249
7.18	49.379	-1.846	48.035
7.2	49.072	-1.811	47.82
7.22	48.852	-1.777	47.601
7.24	48.588	-1.743	47.38
7.26	48.369	-1.707	47.16
7.28	48.017	-1.666	46.943
7.3	47.841	-1.625	46.726
7.32	47.665	-1.585	46.505
7.34	47.358	-1.549	46.277
7.36	47.27	-1.521	46.037
7.38	46.962	-1.494	45.794
7.4	46.743	-1.468	45.548
7.42	46.699	-1.442	45.299
7.44	46.215	-1.413	45.054
7.46	46.127	-1.385	44.804
7.48	45.952	-1.357	44.553
7.5	45.688	-1.328	44.302
7.52	45.38	-1.298	44.05
7.54	45.248	-1.27	43.793
7.56	44.985	-1.243	43.534
7.58	44.941	-1.219	43.269
7.6	44.326	-1.191	43.007
7.62	44.15	-1.166	42.74
7.64	43.886	-1.139	42.473
7.66	43.622	-1.112	42.204
7.68	43.315	-1.086	41.933
7.7	43.139	-1.062	41.658
7.72	42.787	-1.037	41.382
7.74	42.568	-1.011	41.105
7.76	42.348	-0.986	40.826
7.78	41.953	-0.962	40.544
7.8	41.689	-0.942	40.255
7.82	41.425	-0.926	39.959
7.84	41.162	-0.91	39.662
7.86	40.722	-0.891	39.367
7.88	40.502	-0.872	39.071
7.9	40.414	-0.851	38.775
7.92	40.107	-0.829	38.48
7.94	39.931	-0.807	38.182
7.96	39.404	-0.78	37.889
7.98	39.096	-0.751	37.597
8	38.876	-0.717	37.31
8.02	38.481	-0.677	37.029
8.04	38.129	-0.635	36.749
8.06	37.866	-0.596	36.463
8.08	37.602	-0.564	36.167
8.1	37.25	-0.537	35.864
8.12	37.075	-0.511	35.558
8.14	36.811	-0.48	35.257
8.16	36.371	-0.44	34.966
8.18	36.371	-0.399	34.674
8.2	36.108	-0.358	34.382
8.22	35.712	-0.319	34.084
8.24	35.537	-0.287	33.777
8.26	35.141	-0.258	33.466
8.28	34.57	-0.226	33.156
8.3	34.218	-0.192	32.847
8.32	34.174	-0.156	32.54
8.34	33.823	-0.116	32.237
8.36	33.339	-0.075	31.934
8.38	33.251	-0.036	31.626
8.4	32.856	0.005	31.32
8.42	32.548	0.048	31.016
8.44	32.329	0.097	30.716
8.46	32.153	0.149	30.421
8.48	31.669	0.205	30.129
8.5	31.45	0.264	29.839
8.52	31.318	0.324	29.55
8.54	30.966	0.386	29.262
8.56	30.79	0.449	28.974
8.58	30.351	0.519	28.693
8.6	30.131	0.598	28.423
8.62	29.955	0.688	28.165
8.64	29.516	0.787	27.919
8.66	29.208	0.894	27.679
8.68	28.901	1.01	27.452
8.7	28.505	1.137	27.236
8.72	28.329	1.267	27.023
8.74	28.022	1.39	26.8
8.76	27.626	1.501	26.562
8.78	27.495	1.602	26.309
8.8	27.099	1.699	26.052
8.82	26.967	1.794	25.79
8.84	26.66	1.893	25.533
8.86	26.44	1.996	25.28
8.88	26.22	2.106	25.034
8.9	26.044	2.216	24.788
8.92	25.869	2.322	24.535
8.94	25.605	2.42	24.273
8.96	25.473	2.511	24
8.98	25.121	2.594	23.717
9	25.034	2.667	23.42
9.02	24.77	2.738	23.12
9.04	24.374	2.818	22.831
9.06	24.287	2.915	22.561
9.08	23.847	3.028	22.311
9.1	23.671	3.144	22.064
9.12	23.232	3.26	21.817
9.14	23.012	3.375	21.567
9.16	22.704	3.486	21.312
9.18	22.441	3.587	21.043
9.2	21.957	3.673	20.756
9.22	21.738	3.747	20.453
9.24	21.65	3.817	20.144
9.26	21.386	3.892	19.84
9.28	20.947	3.97	19.54
9.3	20.815	4.044	19.234
9.32	20.639	4.113	18.922
9.34	20.244	4.179	18.605
9.36	20.112	4.242	18.284
9.38	19.672	4.298	17.954
9.4	19.409	4.339	17.604
9.42	19.101	4.365	17.235
9.44	18.837	4.382	16.854
9.46	18.53	4.399	16.473
9.48	17.914	4.423	16.1
9.5	17.783	4.451	15.732
9.52	17.387	4.478	15.362
9.54	16.904	4.495	14.98
9.56	16.552	4.502	14.583
9.58	16.376	4.503	14.18
9.6	15.805	4.505	13.778
9.62	15.234	4.508	13.377
9.64	14.97	4.508	12.971
9.66	14.575	4.503	12.558
9.68	14.135	4.494	12.141
9.7	13.915	4.49	11.73
9.72	13.432	4.497	11.331
9.74	13.08	4.51	10.94
9.76	12.685	4.523	10.55
9.78	12.289	4.535	10.158
9.8	11.806	4.55	9.768
9.82	11.367	4.564	9.379
9.84	10.927	4.578	8.988
9.86	10.488	4.592	8.598
9.88	10.18	4.614	8.217
9.9	9.697	4.641	7.842
9.92	9.301	4.663	7.462
9.94	8.862	4.675	7.069
9.96	8.554	4.68	6.667
9.98	8.159	4.686	6.267
10	7.807	4.694	5.868
10.02	7.28	4.7	5.466
10.04	6.884	4.7	5.058
10.06	6.577	4.698	4.647
10.08	6.225	4.697	4.238
10.1	5.742	4.699	3.832
10.12	5.434	4.7	3.425
10.14	5.214	4.7	3.018
10.16	4.599	4.702	2.611
10.18	4.379	4.7	2.202
10.2	3.896	4.693	1.785
10.22	3.544	4.681	1.363
10.24	2.973	4.673	0.945
10.26	2.709	4.671	0.535
10.28	2.27	4.673	0.131
10.3	1.699	4.679	-0.268
10.32	1.347	4.689	-0.662
10.34	0.908	4.699	-1.057
10.36	0.38	4.702	-1.458
10.38	0.073	4.702	-1.864
10.4	-0.455	4.706	-4.144
10.42	-0.762	4.726	-4.617
10.44	-1.158	4.764	-5.069
10.46	-1.465	4.813	-5.504
10.48	-1.949	4.865	-5.937
10.5	-2.52	4.91	-6.377
10.52	-3.179	4.942	-6.833
10.54	-3.882	4.967	-7.298
10.56	-4.542	4.995	-7.759
10.58	-5.289	5.038	-8.199
10.6	-6.124	5.1	-8.616
10.62	-6.871	5.17	-9.022
10.64	-7.53	5.239	-9.429
10.66	-8.233	5.302	-9.841
10.68	-8.892	5.357	-10.264
10.7	-9.42	5.396	-10.706
10.72	-9.815	5.414	-11.174
10.74	-10.211	5.416	-11.662
10.76	-10.694	5.409	-12.158
10.78	-10.958	5.395	-12.664
10.8	-11.221	5.363	-13.192
10.82	-11.485	5.312	-13.742
10.84	-11.749	5.257	-14.297
10.86	-12.056	5.212	-14.837
10.88	-12.584	5.179	-15.363
10.9	-12.847	5.145	-15.888
10.92	-13.331	5.101	-16.425
10.94	-13.946	5.052	-16.968
10.96	-14.297	5.02	-17.488
10.98	-14.957	5.025	-17.961
11	-15.484	5.076	-18.377
11.02	-16.231	5.154	-18.756
11.04	-16.802	5.237	-19.13
11.06	-17.418	5.303	-19.522
11.08	-18.033	5.352	-19.936
11.1	-18.648	5.388	-20.365
11.12	-19.263	5.41	-20.809
11.14	-19.791	5.417	-21.272
11.16	-20.274	5.407	-21.755
11.18	-20.67	5.382	-22.255
11.2	-21.109	5.342	-22.772
11.22	-21.417	5.288	-23.306
11.24	-21.768	5.225	-23.851
11.26	-22.12	5.16	-24.397
11.28	-22.515	5.098	-24.937
11.3	-22.779	5.042	-25.469
11.32	-23.174	4.994	-25.99
11.34	-23.614	4.961	-26.491
11.36	-24.141	4.941	-26.974
11.38	-24.581	4.923	-27.453
11.4	-25.152	4.898	-27.94
11.42	-25.635	4.872	-28.426
11.44	-26.295	4.865	-28.888
11.46	-26.91	4.888	-29.31
11.48	-27.525	4.938	-29.699
11.5	-28.14	4.995	-30.075
11.52	-28.755	5.048	-30.456
11.54	-29.327	5.093	-30.846
11.56	-29.854	5.129	-31.245
11.58	-30.294	5.159	-31.65
11.6	-30.821	5.18	-32.065
11.62	-31.26	5.195	-32.486
11.64	-31.524	5.202	-32.916
11.66	-31.92	5.194	-33.363
11.68	-32.227	5.17	-33.828
11.7	-32.535	5.133	-34.307
11.72	-32.798	5.095	-34.787
11.74	-33.062	5.061	-35.26
11.76	-33.414	5.027	-35.731
11.78	-33.721	4.985	-36.21
11.8	-34.205	4.932	-36.701
11.82	-34.644	4.88	-37.19
11.84	-35.084	4.843	-37.658
11.86	-35.567	4.832	-38.091
11.88	-36.05	4.853	-38.484
11.9	-36.534	4.899	-38.843
11.92	-37.149	4.958	-39.184
11.94	-37.764	5.016	-39.525
11.96	-38.292	5.064	-39.876
11.98	-38.775	5.102	-40.237
12	-39.39	5.137	-40.602
12.02	-39.83	5.174	-40.962
12.04	-40.269	5.207	-41.324
12.06	-40.665	5.227	-41.7
12.08	-40.928	5.23	-42.097
12.1	-41.28	5.212	-42.517
12.12	-41.544	5.178	-42.957
12.14	-41.807	5.13	-43.41
12.16	-42.071	5.077	-43.87
12.18	-42.335	5.026	-44.323
12.2	-42.686	4.985	-44.763
12.22	-42.906	4.958	-45.183
12.24	-43.345	4.94	-45.59
12.26	-43.741	4.926	-45.989
12.28	-44.18	4.91	-46.389
12.3	-44.576	4.894	-46.787
12.32	-45.103	4.886	-47.174
12.34	-45.587	4.895	-47.536
12.36	-46.114	4.92	-47.877
12.38	-46.597	4.944	-48.217
12.4	-47.125	4.95	-48.577
12.42	-47.608	4.936	-48.959
12.44	-48.135	4.917	-49.346
12.46	-48.531	4.906	-49.72
12.48	-48.838	4.906	-50.08
12.5	-49.19	4.905	-50.438
12.52	-49.542	4.895	-50.804
12.54	-49.893	4.875	-51.181
12.56	-50.201	4.844	-51.57
12.58	-50.464	4.801	-51.971
12.6	-50.772	4.748	-52.383
12.62	-51.08	4.694	-52.793
12.64	-51.343	4.65	-53.189
12.66	-51.783	4.618	-53.567
12.68	-52.09	4.598	-53.928
12.7	-52.486	4.581	-54.282
12.72	-52.838	4.568	-54.63
12.74	-53.233	4.557	-54.973
12.76	-53.672	4.551	-55.306
12.78	-54.068	4.552	-55.63
12.8	-54.551	4.554	-55.949
12.82	-54.903	4.554	-56.268
12.84	-55.386	4.549	-56.591
12.86	-55.782	4.547	-56.908
12.88	-56.177	4.554	-57.21
12.9	-56.485	4.57	-57.5
12.92	-56.88	4.584	-57.789
12.94	-57.188	4.589	-58.087
12.96	-57.408	4.583	-58.396
12.98	-57.715	4.565	-58.718
13	-57.891	4.535	-59.053
13.02	-58.199	4.488	-59.405
13.04	-58.463	4.432	-59.767
13.06	-58.682	4.377	-60.125
13.08	-58.946	4.332	-60.468
13.1	-59.166	4.304	-60.786
13.12	-59.473	4.294	-61.081
13.14	-59.781	4.294	-61.359
13.16	-60.088	4.295	-61.634
13.18	-60.528	4.289	-61.914
13.2	-60.967	4.282	-62.194
13.22	-61.319	4.285	-62.458
13.24	-61.671	4.304	-62.7
13.26	-62.066	4.339	-62.918
13.28	-62.33	4.385	-63.121
13.3	-62.593	4.429	-63.323
13.32	-62.989	4.459	-63.54
13.34	-63.209	4.476	-63.77
13.36	-63.428	4.482	-64.012
13.38	-63.648	4.483	-64.257
13.4	-63.824	4.484	-64.499
13.42	-64	4.483	-64.742
13.44	-64.263	4.479	-64.985
13.46	-64.351	4.476	-65.223
13.48	-64.527	4.476	-65.456
13.5	-64.703	4.482	-65.678
13.52	-64.879	4.496	-65.887
13.54	-65.054	4.518	-66.084
13.56	-65.406	4.541	-66.276
13.58	-65.582	4.564	-66.465
13.6	-65.889	4.586	-66.653
13.62	-66.109	4.612	-66.834
13.64	-66.373	4.642	-67.006
13.66	-66.548	4.676	-67.17
13.68	-66.768	4.712	-67.33
13.7	-67.032	4.744	-67.491
13.72	-67.164	4.77	-67.656
13.74	-67.471	4.786	-67.831
13.76	-67.559	4.8	-68.007
13.78	-67.647	4.813	-68.179
13.8	-67.779	4.83	-68.344
13.82	-67.955	4.85	-68.503
13.84	-68.13	4.873	-68.655
13.86	-68.306	4.899	-68.8
13.88	-68.438	4.922	-68.946
13.9	-68.658	4.935	-69.102
13.92	-68.746	4.939	-69.265
13.94	-68.921	4.939	-69.431
13.96	-69.009	4.937	-69.597
13.98	-69.185	4.925	-69.771
14	-69.405	4.9	-69.959
14.02	-69.493	4.87	-70.151
14.04	-69.713	4.844	-70.334
14.06	-69.888	4.832	-70.497
14.08	-69.976	4.831	-70.643
14.1	-70.24	4.827	-70.789
14.12	-70.46	4.821	-70.936
14.14	-70.504	4.823	-71.07
14.16	-70.767	4.838	-71.183
14.18	-70.899	4.87	-71.272
14.2	-71.031	4.907	-71.353
14.22	-71.207	4.934	-71.442
14.24	-71.426	4.95	-71.544
14.26	-71.558	4.959	-71.649
14.28	-71.734	4.968	-71.752
14.3	-71.822	4.98	-71.849
14.32	-71.866	4.988	-71.946
14.34	-71.91	4.989	-72.051
14.36	-72.042	4.975	-72.17
14.38	-72.042	4.949	-72.301
14.4	-72.086	4.914	-72.441
14.42	-72.086	4.878	-72.578
14.44	-72.217	4.851	-72.701
14.46	-72.349	4.838	-72.804
14.48	-72.393	4.838	-72.887
14.5	-72.613	4.838	-72.968
14.52	-72.657	4.832	-73.052
14.54	-72.789	4.82	-73.141
14.56	-73.008	4.805	-73.231
14.58	-73.052	4.793	-73.314
14.6	-73.228	4.783	-73.391
14.62	-73.448	4.779	-73.456
14.64	-73.492	4.787	-73.505
14.66	-73.492	4.798	-73.546
14.68	-73.668	4.802	-73.593
14.7	-73.712	4.8	-73.645
14.72	-73.799	4.794	-73.698
14.74	-73.843	4.788	-73.748
14.76	-73.887	4.776	-73.802
14.78	-73.931	4.755	-73.866
14.8	-73.931	4.726	-73.935
14.82	-73.931	4.698	-74
14.84	-73.931	4.673	-74.058
14.86	-74.019	4.648	-74.113
14.88	-74.107	4.62	-74.168
14.9	-74.151	4.592	-74.221
14.92	-74.195	4.567	-74.266
14.94	-74.327	4.545	-74.305
14.96	-74.327	4.523	-74.34
14.98	-74.371	4.498	-74.376
15	-74.546	4.468	-74.415
15.02	-74.546	4.438	-74.451
15.04	-74.59	4.407	-74.485
15.06	-74.59	4.376	-74.515
15.08	-74.59	4.35	-74.537
15.1	-74.59	4.33	-74.548
15.12	-74.634	4.316	-74.548
15.14	-74.678	4.308	-74.538
15.16	-74.722	4.304	-74.519
15.18	-74.722	4.304	-74.493
15.2	-74.766	4.304	-74.463
15.22	-74.766	4.3	-74.434
15.24	-74.766	4.288	-74.413
15.26	-74.81	4.264	-74.404
15.28	-74.81	4.232	-74.401
15.3	-74.766	4.197	-74.399
15.32	-74.678	4.16	-74.396
15.34	-74.634	4.12	-74.394
15.36	-74.634	4.078	-74.392
15.38	-74.634	4.036	-74.385
15.4	-74.59	3.999	-74.37
15.42	-74.546	3.967	-74.346
15.44	-74.59	3.937	-74.315
15.46	-74.546	3.911	-74.277
15.48	-74.546	3.886	-74.234
15.5	-74.546	3.864	-74.185
15.52	-74.546	3.845	-74.128
15.54	-74.503	3.83	-74.065
15.56	-74.546	3.812	-74
15.58	-74.546	3.791	-73.937
15.6	-74.503	3.768	-73.873
15.62	-74.503	3.743	-73.808
15.64	-74.503	3.719	-73.74
15.66	-74.371	3.693	-73.67
15.68	-74.239	3.661	-73.605
15.7	-74.195	3.623	-73.544
15.72	-74.107	3.583	-73.483
15.74	-74.063	3.542	-73.42
15.76	-73.755	3.506	-73.348
15.78	-73.755	3.47	-73.273
15.8	-73.58	3.439	-73.188
15.82	-73.536	3.409	-73.099
15.84	-73.448	3.38	-73.005
15.86	-73.404	3.349	-72.911
15.88	-73.404	3.317	-72.816
15.9	-73.316	3.287	-72.714
15.92	-73.316	3.259	-72.608
15.94	-73.272	3.232	-72.497
15.96	-73.184	3.205	-72.382
15.98	-73.184	3.176	-72.269
16	-73.008	3.144	-72.154
16.02	-72.833	3.109	-72.041
16.04	-72.613	3.071	-71.929
16.06	-72.613	3.028	-71.82
16.08	-72.393	2.987	-71.705
16.1	-72.305	2.945	-71.589
16.12	-72.173	2.905	-71.468
16.14	-72.086	2.865	-71.343
16.16	-71.91	2.826	-71.213
16.18	-71.822	2.789	-71.08
16.2	-71.734	2.753	-70.941
16.22	-71.646	2.72	-70.795
16.24	-71.646	2.689	-70.645
16.26	-71.382	2.66	-70.489
16.28	-71.295	2.625	-70.337
16.3	-71.119	2.586	-70.188
16.32	-70.943	2.542	-70.042
16.34	-70.855	2.497	-69.894
16.36	-70.591	2.458	-69.736
16.38	-70.547	2.419	-69.575
16.4	-70.416	2.38	-69.411
16.42	-70.152	2.34	-69.246
16.44	-69.976	2.295	-69.084
16.46	-69.932	2.245	-68.925
16.48	-69.669	2.195	-68.763
16.5	-69.581	2.144	-68.601
16.52	-69.361	2.095	-68.432
16.54	-69.229	2.048	-68.258
16.56	-69.053	2.003	-68.08
16.58	-68.921	1.96	-67.896
16.6	-68.79	1.922	-67.702
16.62	-68.614	1.89	-67.498
16.64	-68.438	1.863	-67.286
16.66	-68.306	1.837	-67.069
16.68	-67.955	1.813	-66.848
16.7	-67.911	1.784	-66.629
16.72	-67.603	1.755	-66.409
16.74	-67.515	1.719	-66.193
16.76	-67.296	1.683	-65.976
16.78	-67.12	1.648	-65.754
16.82	-66.592	1.594	-65.283
16.84	-66.285	1.572	-65.037
16.86	-66.109	1.548	-64.791
16.88	-65.801	1.522	-64.545
16.9	-65.626	1.492	-64.302
16.92	-65.318	1.458	-64.06
16.94	-65.23	1.42	-63.821
16.96	-65.01	1.383	-63.578
16.98	-64.747	1.35	-63.328
17	-64.439	1.321	-63.071
17.02	-64.263	1.293	-62.809
17.04	-64	1.266	-62.543
17.06	-63.692	1.238	-62.276
17.08	-63.428	1.209	-62.008
17.1	-63.077	1.18	-61.738
17.12	-62.857	1.149	-61.467
17.14	-62.549	1.121	-61.191
17.16	-62.33	1.093	-60.91
17.18	-62.022	1.07	-60.623
17.2	-61.758	1.048	-60.331
17.22	-61.539	1.027	-60.036
17.24	-61.319	1.005	-59.739
17.26	-60.967	0.987	-59.435
17.28	-60.792	0.97	-59.127
17.3	-60.528	0.957	-58.813
17.32	-60.176	0.945	-58.494
17.34	-59.869	0.931	-58.176
17.36	-59.605	0.914	-57.859
17.38	-59.254	0.897	-57.54
17.4	-58.946	0.879	-57.219
17.42	-58.55	0.862	-56.895
17.44	-58.243	0.842	-56.572
17.46	-57.979	0.822	-56.248
17.48	-57.54	0.803	-55.919
17.5	-57.276	0.785	-55.587
17.52	-56.924	0.77	-55.25
17.54	-56.661	0.754	-54.911
17.56	-56.265	0.739	-54.568
17.58	-55.914	0.724	-54.224
17.6	-55.65	0.708	-53.879
17.62	-55.342	0.691	-53.532
17.64	-54.991	0.668	-53.192
17.66	-54.639	0.633	-52.864
17.68	-54.244	0.585	-52.55
17.7	-54.024	0.528	-52.245
17.72	-53.672	0.466	-51.944
17.74	-53.497	0.395	-51.654
17.76	-53.189	0.31	-51.376
17.78	-52.881	0.208	-51.12
17.8	-52.574	0.086	-50.887
17.82	-52.354	-0.056	-50.676
17.84	-51.871	-0.212	-50.48
17.86	-51.519	-0.379	-50.296
17.88	-51.212	-0.55	-50.116
17.9	-50.904	-0.722	-49.935
17.92	-50.596	-0.897	-49.755
17.94	-50.377	-1.074	-49.577
17.96	-50.157	-1.249	-49.394
17.98	-49.893	-1.417	-49.2
18	-49.761	-1.582	-49.001
18.02	-49.629	-1.751	-48.804
18.04	-49.542	-1.93	-48.619
18.06	-49.454	-2.121	-48.446
18.08	-49.322	-2.32	-48.282
18.1	-49.19	-2.518	-48.114
18.12	-49.058	-2.704	-47.93
18.14	-48.882	-2.876	-47.726
18.16	-48.751	-3.038	-47.509
18.18	-48.531	-3.192	-47.28
18.2	-48.355	-3.338	-47.038
18.22	-48.223	-3.47	-46.778
18.24	-47.96	-3.586	-46.496
18.26	-47.74	-3.69	-46.197
18.28	-47.52	-3.789	-45.892
18.3	-47.213	-3.891	-45.588
18.32	-46.993	-4.005	-45.296
18.34	-46.729	-4.132	-45.019
18.36	-46.421	-4.269	-44.755
18.38	-46.202	-4.408	-44.491
18.4	-45.85	-4.541	-44.216
18.42	-45.543	-4.671	-43.938
18.44	-45.279	-4.807	-43.666
18.46	-44.971	-4.946	-43.395
18.48	-44.576	-5.067	-43.1
18.5	-44.224	-5.145	-42.751
18.52	-43.961	-5.177	-42.342
18.54	-43.609	-5.187	-41.905
18.56	-43.433	-5.21	-41.481
18.58	-43.038	-5.242	-41.069
18.6	-42.774	-5.253	-40.628
18.62	-42.422	-5.202	-40.11
18.64	-41.983	-5.074	-39.492
18.66	-41.675	-4.878	-38.789
18.68	-41.28	-4.636	-38.027
18.7	-40.796	-4.376	-37.242
18.72	-40.401	-4.124	-36.465
18.74	-39.874	-3.896	-35.716
18.76	-39.346	-3.701	-35.009
18.78	-38.819	-3.544	-34.346
18.8	-38.16	-3.422	-33.727
18.82	-37.369	-3.335	-33.15
18.84	-36.622	-3.28	-32.613
18.86	-35.875	-3.251	-32.106
18.88	-35.084	-3.242	-31.624
18.9	-34.293	-3.252	-31.164
18.92	-33.502	-3.281	-30.727
18.94	-32.754	-3.327	-30.31
18.96	-31.963	-3.385	-29.907
18.98	-31.172	-3.45	-29.511
19	-30.601	-3.51	-29.108
19.02	-29.942	-3.553	-28.684
19.04	-29.459	-3.58	-28.238
19.06	-28.975	-3.596	-27.778
19.08	-28.668	-3.605	-27.308
19.1	-28.272	-3.605	-26.826
19.12	-28.052	-3.594	-26.329
19.14	-27.701	-3.57	-25.814
19.16	-27.613	-3.535	-25.287
19.18	-27.261	-3.49	-24.744
19.2	-26.998	-3.437	-24.191
19.22	-26.69	-3.378	-23.631
19.24	-26.295	-3.323	-23.073
19.26	-25.899	-3.279	-22.53
19.28	-25.372	-3.251	-22.005
19.3	-24.888	-3.237	-21.498
19.32	-24.273	-3.233	-21.002
19.34	-23.658	-3.238	-20.517
19.36	-22.999	-3.251	-20.04
19.38	-22.383	-3.273	-19.575
19.4	-21.768	-3.305	-19.122
19.42	-21.065	-3.342	-18.673
19.44	-20.406	-3.372	-18.217
19.46	-19.747	-3.388	-17.742
19.48	-19.044	-3.391	-17.25
19.5	-18.472	-3.385	-16.746
19.52	-18.033	-3.37	-16.23
19.54	-17.549	-3.343	-15.699
19.56	-17.11	-3.303	-15.152
19.58	-16.758	-3.257	-14.596
19.6	-16.495	-3.213	-14.043
19.62	-16.055	-3.177	-13.498
19.64	-15.66	-3.147	-12.963
19.66	-15.22	-3.119	-12.427
19.68	-14.913	-3.087	-11.888
19.7	-14.385	-3.054	-11.346
19.72	-13.946	-3.026	-10.811
19.74	-13.419	-3.006	-10.284
19.76	-12.847	-2.992	-9.766
19.78	-12.056	-2.985	-9.256
19.8	-11.617	-2.986	-8.755
19.82	-10.958	-2.992	-8.261
19.84	-10.43	-2.999	-7.768
19.86	-9.771	-3.005	-7.274
19.88	-9.2	-3.012	-6.78
19.9	-8.497	-3.021	-6.289
19.92	-8.013	-3.035	-5.804
19.94	-7.442	-3.052	-5.323
19.96	-7.134	-3.068	-4.84
19.98	-6.343	-3.077	-4.349
20	-5.948	-3.08	-3.849
20.02	-5.333	-3.073	-3.338
20.04	-5.157	-3.057	-2.816
20.06	-4.673	-3.032	-2.282
20.08	-4.234	-3.001	-1.741
20.1	-3.795	-2.968	-1.197
20.12	-3.399	-2.938	-0.657
20.14	-2.872	-2.912	-0.122
20.16	-2.476	-2.889	0.408
20.18	-1.949	-2.867	0.937
20.2	-1.465	-2.847	1.465
20.22	-0.938	-2.828	1.989
20.24	-0.455	-2.814	2.508
20.26	0.073	-2.804	1.799
20.28	0.776	-2.798	2.212
20.3	1.347	-2.801	2.616
20.32	2.006	-2.812	3.008
20.34	2.534	-2.826	3.397
20.36	3.017	-2.837	3.79
20.38	3.456	-2.838	4.194
20.4	3.544	-2.829	4.611
20.42	3.94	-2.811	5.038
20.44	4.028	-2.788	5.471
20.46	4.247	-2.765	5.905
20.48	4.335	-2.743	6.336
20.5	4.511	-2.72	6.768
20.52	4.775	-2.695	7.202
20.54	5.038	-2.666	7.642
20.56	5.346	-2.634	8.084
20.58	5.873	-2.604	8.524
20.6	6.313	-2.581	8.954
20.62	6.796	-2.572	9.366
20.64	7.104	-2.577	9.76
20.66	7.807	-2.592	10.142
20.68	8.334	-2.611	10.517
20.7	8.862	-2.633	10.888
20.72	9.345	-2.658	11.255
20.74	9.872	-2.686	11.618
20.76	10.356	-2.717	11.977
20.78	10.883	-2.748	12.333
20.8	11.367	-2.776	12.695
20.82	11.674	-2.791	13.072
20.84	12.158	-2.789	13.468
20.86	12.421	-2.774	13.881
20.88	12.729	-2.754	14.299
20.9	12.949	-2.733	14.718
20.92	13.256	-2.714	15.134
20.94	13.608	-2.695	15.548
20.96	13.871	-2.678	15.96
20.98	14.223	-2.663	16.368
21	14.575	-2.65	16.774
21.02	15.014	-2.636	17.179
21.04	15.41	-2.621	17.586
21.06	15.717	-2.605	17.991
21.08	16.332	-2.593	18.392
21.1	16.508	-2.586	18.785
21.12	17.167	-2.587	19.168
21.14	17.475	-2.591	19.546
21.16	18.046	-2.599	19.919
21.18	18.442	-2.607	20.289
21.2	18.925	-2.617	20.657
21.22	19.321	-2.625	21.026
21.24	19.804	-2.632	21.396
21.26	20.287	-2.636	21.767
21.28	20.595	-2.639	22.14
21.3	20.991	-2.64	22.514
21.32	21.298	-2.64	22.889
21.34	21.65	-2.639	23.263
21.36	22.089	-2.642	23.632
21.38	22.485	-2.646	23.998
21.4	22.573	-2.647	24.367
21.42	22.88	-2.645	24.738
21.44	23.232	-2.643	25.109
21.46	23.583	-2.639	25.481
21.48	23.935	-2.632	25.855
21.5	24.374	-2.623	26.231
21.52	24.726	-2.613	26.606
21.54	25.253	-2.608	26.974
21.56	25.517	-2.607	27.337
21.58	25.912	-2.607	27.696
21.6	26.352	-2.608	28.054
21.62	26.879	-2.61	28.409
21.64	27.143	-2.615	28.759
21.66	27.407	-2.625	29.101
21.68	27.758	-2.639	29.436
21.7	28.242	-2.655	29.77
21.72	28.549	-2.666	30.106
21.74	28.945	-2.675	30.444
21.76	29.296	-2.681	30.786
21.78	29.648	-2.685	31.127
21.8	29.999	-2.689	31.468
21.82	30.395	-2.693	31.806
21.84	30.571	-2.699	32.142
21.86	30.878	-2.71	32.469
21.88	31.23	-2.726	32.79
21.9	31.669	-2.742	33.107
21.92	31.889	-2.754	33.429
21.94	32.329	-2.764	33.753
21.96	32.504	-2.771	34.078
21.98	32.9	-2.783	34.396
22	33.383	-2.798	34.708
22.02	33.427	-2.812	35.021
22.04	33.911	-2.826	35.332
22.06	34.042	-2.836	35.646
22.08	34.57	-2.847	35.957
22.1	34.702	-2.855	36.27
22.12	35.229	-2.863	36.582
22.14	35.58	-2.868	36.897
22.16	35.712	-2.87	37.213
22.18	35.976	-2.873	37.526
22.2	36.284	-2.878	37.835
22.22	36.547	-2.883	38.143
22.24	37.031	-2.887	38.449
22.26	37.119	-2.89	38.757
22.28	37.734	-2.899	39.054
22.3	38.129	-2.912	39.345
22.32	38.393	-2.929	39.63
22.34	38.569	-2.944	39.915
22.36	39.052	-2.956	40.201
22.38	39.316	-2.964	40.493
22.4	39.711	-2.971	40.782
22.42	39.931	-2.979	41.068
22.44	40.195	-2.989	41.352
22.46	40.502	-2.995	41.637
22.48	40.634	-2.995	41.928
22.5	40.942	-2.993	42.22
22.52	41.381	-2.993	42.509
22.54	41.381	-2.993	42.795
22.56	41.689	-3.001	43.069
22.58	41.865	-3.011	43.338
22.6	42.348	-3.024	43.603
22.62	42.568	-3.034	43.87
22.64	42.7	-3.043	44.135
22.66	43.139	-3.06	44.388
22.68	43.403	-3.085	44.63
22.7	43.666	-3.116	44.862
22.72	44.062	-3.148	45.091
22.74	44.413	-3.176	45.323
22.76	44.677	-3.201	45.558
22.78	44.853	-3.223	45.794
22.8	45.161	-3.24	46.033
22.82	45.556	-3.249	46.282
22.84	45.82	-3.247	46.541
22.86	45.82	-3.239	46.807
22.88	46.171	-3.237	47.063
22.9	46.391	-3.24	47.31
22.92	46.523	-3.245	47.553
22.94	46.567	-3.246	47.799
22.96	46.787	-3.242	48.05
22.98	47.182	-3.239	48.296
23	47.226	-3.242	48.534
23.02	47.621	-3.26	48.75
23.04	47.709	-3.284	48.957
23.06	48.017	-3.311	49.158
23.08	48.412	-3.335	49.361
23.1	48.544	-3.356	49.565
23.12	48.984	-3.382	49.761
23.14	49.291	-3.412	49.95
23.16	49.511	-3.444	50.135
23.18	49.555	-3.472	50.322
23.2	50.038	-3.499	50.508
23.22	50.126	-3.519	50.7
23.24	50.258	-3.537	50.894
23.26	50.346	-3.553	51.087
23.28	50.522	-3.569	51.278
23.3	50.654	-3.582	51.47
23.32	50.786	-3.596	51.66
23.34	51.049	-3.615	51.841
23.36	51.225	-3.643	52.009
23.38	51.401	-3.679	52.163
23.4	51.664	-3.72	52.31
23.42	51.884	-3.76	52.456
23.44	52.016	-3.795	52.605
23.46	52.236	-3.828	52.755
23.48	52.368	-3.854	52.911
23.5	52.587	-3.877	53.069
23.52	52.719	-3.898	53.228
23.54	52.851	-3.921	53.38
23.56	52.895	-3.948	53.526
23.58	53.027	-3.977	53.667
23.6	53.115	-4.004	53.809
23.62	53.29	-4.028	53.952
23.64	53.422	-4.051	54.094
23.66	53.686	-4.077	54.229
23.68	53.994	-4.105	54.359
23.7	54.037	-4.132	54.489
23.72	54.301	-4.16	54.615
23.74	54.433	-4.187	54.74
23.76	54.433	-4.213	54.864
23.78	54.521	-4.235	54.99
23.8	54.741	-4.251	55.121
23.82	54.872	-4.261	55.258
23.84	54.96	-4.273	55.391
23.86	55.004	-4.289	55.514
23.88	55.092	-4.312	55.628
23.9	55.092	-4.334	55.739
23.92	55.4	-4.358	55.847
23.94	55.4	-4.378	55.957
23.96	55.532	-4.4	56.061
23.98	55.707	-4.426	56.159
24	56.059	-4.456	56.249
24.02	56.147	-4.483	56.34
24.04	56.191	-4.508	56.431
24.06	56.279	-4.532	56.521
24.08	56.411	-4.554	56.611
24.1	56.454	-4.574	56.701
24.12	56.542	-4.594	56.79
24.14	56.542	-4.614	56.875
24.16	56.674	-4.64	56.95
24.18	56.718	-4.672	57.015
24.2	56.718	-4.71	57.07
24.22	56.85	-4.751	57.12
24.24	56.938	-4.789	57.17
24.26	57.07	-4.823	57.222
24.28	57.202	-4.855	57.275
24.3	57.421	-4.887	57.326
24.32	57.421	-4.913	57.381
24.34	57.421	-4.933	57.441
24.36	57.421	-4.945	57.509
24.38	57.509	-4.951	57.582
24.4	57.509	-4.951	57.66
24.42	57.641	-4.949	57.738
24.44	57.641	-4.945	57.815
24.46	57.641	-4.945	57.885
24.48	57.729	-4.954	57.942
24.5	57.729	-4.97	57.987
24.52	57.861	-4.992	58.023
24.54	57.993	-5.014	58.056
24.56	58.037	-5.034	58.087
24.58	58.124	-5.056	58.115
24.6	58.212	-5.08	58.137
24.62	58.212	-5.105	58.156
24.64	58.256	-5.126	58.178
24.66	58.3	-5.135	58.211
24.68	58.3	-5.129	58.26
24.7	58.3	-5.113	58.32
24.72	58.3	-5.099	58.375
24.74	58.3	-5.099	58.409
24.76	58.344	-5.115	58.422
24.78	58.432	-5.14	58.42
24.8	58.564	-5.166	58.414
24.82	58.52	-5.187	58.412
24.84	58.652	-5.204	58.413
24.86	58.652	-5.211	58.423
24.88	58.652	-5.209	58.443
24.9	58.652	-5.198	58.47
24.92	58.652	-5.182	58.502
24.94	58.608	-5.165	58.532
24.96	58.432	-5.146	58.562
24.98	58.432	-5.131	58.585
25	58.432	-5.12	58.6
25.02	58.432	-5.116	58.604
25.04	58.52	-5.119	58.596
25.06	58.652	-5.13	58.576
25.08	58.74	-5.145	58.548
25.1	58.74	-5.166	58.511
25.12	58.74	-5.189	58.468
25.14	58.74	-5.209	58.426
25.16	58.74	-5.221	58.392
25.18	58.74	-5.218	58.373
25.2	58.74	-5.199	58.373
25.22	58.74	-5.163	58.392
25.24	58.74	-5.112	58.425
25.26	58.696	-5.053	58.467
25.28	58.696	-4.993	58.507
25.3	58.696	-4.936	58.542
25.32	58.564	-4.881	58.57
25.34	58.564	-4.834	58.587
25.36	58.564	-4.799	58.586
25.38	58.564	-4.78	58.563
25.4	58.564	-4.775	58.519
25.42	58.696	-4.782	58.457
25.44	58.74	-4.802	58.377
25.46	58.74	-4.834	58.28
25.48	58.74	-4.87	58.175
25.5	58.696	-4.896	58.08
25.52	58.696	-4.901	58.008
25.54	58.652	-4.88	57.967
25.56	58.608	-4.837	57.95
25.58	58.564	-4.777	57.953
25.6	58.344	-4.706	57.966
25.62	58.212	-4.638	57.973
25.64	58.212	-4.581	57.965
25.66	58.124	-4.535	57.939
25.68	58.124	-4.503	57.894
25.7	57.993	-4.483	57.831
25.72	57.949	-4.474	57.752
25.74	57.949	-4.472	57.661
25.76	57.949	-4.471	57.568
25.78	57.949	-4.464	57.479
25.8	57.949	-4.449	57.396
25.82	57.905	-4.427	57.321
25.84	57.905	-4.401	57.249
25.86	57.905	-4.372	57.177
25.88	57.817	-4.345	57.1
25.9	57.553	-4.322	57.017
25.92	57.553	-4.303	56.925
25.94	57.465	-4.279	56.837
25.96	57.421	-4.245	56.76
25.98	57.246	-4.198	56.696
26	57.114	-4.148	56.633
26.02	57.114	-4.104	56.561
26.04	57.07	-4.067	56.477
26.06	57.026	-4.036	56.384
26.08	56.806	-4.008	56.285
26.1	56.762	-3.985	56.176
26.12	56.674	-3.965	56.061
26.14	56.63	-3.946	55.944
26.16	56.542	-3.923	55.827
26.18	56.367	-3.899	55.711
26.2	56.279	-3.879	55.587
26.22	56.235	-3.864	55.454
26.24	56.191	-3.852	55.315
26.26	56.103	-3.839	55.175
26.28	56.015	-3.823	55.037
26.3	55.839	-3.802	54.901
26.32	55.707	-3.779	54.767
26.34	55.488	-3.749	54.638
26.36	55.312	-3.71	54.519
26.38	55.092	-3.658	54.414
26.4	55.004	-3.596	54.318
26.42	54.916	-3.531	54.225
26.44	54.829	-3.469	54.125
26.46	54.477	-3.414	54.014
26.48	54.433	-3.37	53.888
26.5	54.301	-3.331	53.752
26.52	54.301	-3.297	53.608
26.54	54.125	-3.264	53.46
26.56	54.081	-3.232	53.309
26.58	54.037	-3.196	53.161
26.6	53.906	-3.153	53.018
26.62	53.862	-3.108	52.878
26.64	53.642	-3.06	52.737
26.66	53.598	-3.015	52.591
26.68	53.29	-2.97	52.443
26.7	53.246	-2.928	52.288
26.72	53.203	-2.887	52.131
26.74	52.807	-2.843	51.974
26.76	52.807	-2.806	51.807
26.78	52.587	-2.775	51.63
26.8	52.587	-2.751	51.442
26.82	52.236	-2.724	51.256
26.84	52.104	-2.694	51.072
26.86	51.928	-2.661	50.889
26.88	51.621	-2.627	50.705
26.9	51.489	-2.599	50.512
26.92	51.357	-2.572	50.315
26.94	51.313	-2.543	50.118
26.96	51.137	-2.511	49.923
26.98	50.961	-2.479	49.726
27	50.873	-2.45	49.524
27.02	50.39	-2.42	49.321
27.04	50.258	-2.392	49.111
27.06	49.951	-2.362	48.904
27.08	49.687	-2.333	48.693
27.1	49.643	-2.31	48.473
27.12	49.423	-2.292	48.243
27.14	49.072	-2.278	48.008
27.16	49.028	-2.265	47.768
27.18	48.984	-2.246	47.535
27.2	48.632	-2.218	47.31
27.22	48.281	-2.185	47.09
27.24	48.017	-2.149	46.872
27.26	48.017	-2.113	46.653
27.28	47.665	-2.071	46.437
27.3	47.49	-2.031	46.218
27.32	47.182	-1.991	45.997
27.34	46.962	-1.954	45.771
27.36	46.743	-1.919	45.539
27.38	46.391	-1.885	45.305
27.4	46.259	-1.853	45.067
27.42	46.171	-1.821	44.826
27.44	46.039	-1.789	44.583
27.46	45.82	-1.758	44.339
27.48	45.38	-1.722	44.097
27.5	45.38	-1.685	43.855
27.52	44.985	-1.637	43.626
27.54	44.677	-1.583	43.402
27.56	44.501	-1.525	43.181
27.58	44.194	-1.465	42.962
27.6	43.93	-1.402	42.743
27.62	43.579	-1.333	42.531
27.64	43.447	-1.257	42.325
27.66	43.271	-1.172	42.13
27.68	43.007	-1.077	41.944
27.7	42.7	-0.972	41.77
27.72	42.656	-0.855	41.609
27.74	42.348	-0.723	41.465
27.76	42.304	-0.587	41.325
27.78	42.128	-0.45	41.183
27.8	41.777	-0.318	41.035
27.82	41.601	-0.188	40.882
27.84	41.601	-0.05	40.737
27.86	41.601	0.101	40.607
27.88	41.557	0.264	40.491
27.9	41.469	0.439	40.388
27.92	41.425	0.627	40.299
27.94	41.381	0.828	40.226
27.96	40.986	1.038	40.161
27.98	40.898	1.239	40.085
28	40.678	1.427	39.99
28.02	40.546	1.603	39.878
28.04	40.458	1.774	39.759
28.06	40.195	1.95	39.645
28.08	40.063	2.129	39.534
28.1	39.931	2.31	39.423
28.12	39.931	2.487	39.305
28.14	39.755	2.656	39.177
28.16	39.667	2.812	39.03
28.18	39.623	2.951	38.862
28.2	39.492	3.076	38.674
28.22	39.316	3.19	38.471
28.24	39.228	3.292	38.252
28.26	39.184	3.383	38.017
28.28	38.964	3.466	37.771
28.3	38.964	3.543	37.517
28.32	38.92	3.623	37.265
28.34	38.701	3.709	37.018
28.36	38.481	3.796	36.773
28.38	38.173	3.883	36.525
28.4	37.954	3.965	36.27
28.42	37.602	4.045	36.011
28.44	37.294	4.13	35.758
28.46	36.943	4.228	35.52
28.48	36.591	4.33	35.285
28.5	36.459	4.416	35.03
28.52	36.24	4.48	34.745
28.54	35.756	4.534	34.447
28.56	35.493	4.595	34.156
28.58	35.361	4.675	33.889
28.6	35.009	4.772	33.641
28.62	34.965	4.873	33.397
28.64	34.482	4.976	33.155
28.66	34.35	5.08	32.913
28.68	34.174	5.197	32.686
28.7	34.042	5.329	32.476
28.72	33.603	5.465	32.271
28.74	33.383	5.583	32.042
28.76	33.339	5.673	31.777
28.78	32.9	5.746	31.49
28.8	32.812	5.812	31.193
28.82	32.372	5.883	30.902
28.84	32.109	5.95	30.604
28.86	31.977	6.005	30.292
28.88	31.625	6.063	29.981
28.9	31.494	6.137	29.689
28.92	31.142	6.23	29.421
28.94	30.878	6.327	29.157
28.96	30.659	6.42	28.886
28.98	30.219	6.516	28.619
29	29.955	6.618	28.358
29.02	29.604	6.723	28.101
29.04	29.384	6.82	27.833
29.06	29.164	6.902	27.545
29.08	28.725	6.967	27.235
29.1	28.461	7.012	26.899
29.12	28.198	7.04	26.542
29.14	27.934	7.055	26.167
29.16	27.626	7.059	25.778
29.18	27.407	7.051	25.373
29.2	26.879	7.024	24.944
29.22	26.572	6.956	24.464
29.24	26.176	6.83	23.91
29.26	26.044	6.639	23.274
29.28	25.517	6.391	22.567
29.3	25.121	6.096	21.8
29.32	24.858	5.778	21.003
29.34	24.418	5.485	20.237
29.36	23.759	5.269	19.567
29.38	23.188	5.144	19.011
29.4	22.617	5.078	18.527
29.42	21.957	5.019	18.052
29.44	21.166	4.935	17.545
29.46	20.463	4.83	17.012
29.48	19.716	4.735	16.49
29.5	18.925	4.671	16.008
29.52	18.222	4.635	15.559
29.54	17.519	4.603	15.114
29.56	16.64	4.564	14.662
29.58	16.069	4.533	14.217
29.6	15.19	4.523	13.8
29.62	14.926	4.519	13.39
29.64	14.179	4.492	12.951
29.66	13.828	4.421	12.456
29.68	13.52	4.317	11.92
29.7	13.168	4.206	11.374
29.72	12.993	4.106	10.843
29.74	12.597	4.021	10.329
29.76	12.158	3.934	9.814
29.78	11.806	3.829	9.275
29.8	11.674	3.71	8.719
29.82	11.235	3.604	8.179
29.84	10.62	3.533	7.682
29.86	10.136	3.491	7.222
29.88	9.872	3.462	6.777
29.9	9.301	3.442	6.344
29.92	8.686	3.437	5.929
29.94	8.071	3.447	5.534
29.96	7.368	3.46	5.142
29.98	6.752	3.471	4.747
30	6.137	3.488	4.361
30.02	5.742	3.521	3.992
30.04	4.951	3.56	3.633
30.06	4.555	3.588	3.259
30.08	4.204	3.59	2.854
30.1	3.72	3.565	2.415
30.12	3.456	3.521	1.951
30.14	3.149	3.466	1.475
30.16	2.797	3.411	0.998
30.18	2.446	3.358	0.524
30.2	2.314	3.309	0.055
30.22	2.006	3.26	-0.413
30.24	1.611	3.211	-0.882
30.26	1.215	3.165	-1.347
30.28	0.952	3.128	-1.801
30.3	0.292	3.103	-2.238
30.32	-0.059	3.089	-4.167
30.34	-0.543	3.083	-4.675
30.36	-0.938	3.087	-5.17
30.38	-1.553	3.106	-5.645
30.4	-1.993	3.138	-6.104
30.42	-2.652	3.167	-6.566
30.44	-3.267	3.184	-7.043
30.46	-4.102	3.196	-7.525
30.48	-4.805	3.218	-7.995
30.5	-5.596	3.252	-8.449
30.52	-6.212	3.285	-8.905
30.54	-7.134	3.308	-9.372
30.56	-7.75	3.331	-9.838
30.58	-8.585	3.371	-10.283
30.6	-9.156	3.426	-10.709
30.62	-9.771	3.477	-11.137
30.64	-10.123	3.514	-11.585
30.66	-10.65	3.537	-12.048
30.68	-10.958	3.555	-12.517
30.7	-11.485	3.562	-12.999
30.72	-11.617	3.548	-13.507
30.74	-11.968	3.513	-14.04
30.76	-12.364	3.474	-14.578
30.78	-12.584	3.445	-15.102
30.8	-12.935	3.427	-15.612
30.82	-13.199	3.412	-16.116
30.84	-13.77	3.398	-16.62
30.86	-14.254	3.39	-17.115
30.88	-14.649	3.395	-17.593
30.9	-15.352	3.411	-18.056
30.92	-15.792	3.434	-18.509
30.94	-16.451	3.458	-18.961
30.96	-16.978	3.485	-19.408
30.98	-17.681	3.52	-19.843
31	-18.165	3.567	-20.263
31.02	-18.692	3.622	-20.672
31.04	-19.307	3.678	-21.077
31.06	-19.879	3.733	-21.485
31.08	-20.362	3.78	-21.901
31.1	-20.845	3.813	-22.333
31.12	-21.241	3.826	-22.789
31.14	-21.68	3.819	-23.269
31.16	-21.9	3.801	-23.762
31.18	-22.252	3.782	-24.255
31.2	-22.735	3.771	-24.737
31.22	-22.999	3.772	-25.201
31.24	-23.35	3.78	-25.657
31.26	-23.702	3.787	-26.113
31.28	-24.009	3.787	-26.576
31.3	-24.537	3.779	-27.048
31.32	-24.976	3.763	-27.529
31.34	-25.416	3.739	-28.018
31.36	-26.031	3.717	-28.504
31.38	-26.47	3.71	-28.969
31.4	-27.042	3.728	-29.403
31.42	-27.657	3.766	-29.809
31.44	-28.14	3.818	-30.197
31.46	-28.668	3.878	-30.574
31.48	-29.283	3.945	-30.94
31.5	-29.766	4.017	-31.298
31.52	-30.25	4.087	-31.657
31.54	-30.733	4.156	-32.016
31.56	-31.129	4.231	-32.367
31.58	-31.524	4.314	-32.707
31.6	-31.788	4.401	-33.04
31.62	-32.051	4.495	-33.362
31.64	-32.447	4.615	-33.649
31.66	-32.623	4.79	-33.867
31.68	-32.93	5.02	-34.015
31.7	-33.15	5.288	-34.114
31.72	-33.414	5.578	-34.183
31.74	-33.721	5.895	-34.217
31.76	-33.765	6.253	-34.198
31.78	-34.029	6.644	-34.136
31.8	-34.073	7.045	-34.06
31.82	-34.205	7.421	-34.013
31.84	-34.205	7.748	-34.027
31.86	-34.205	8.007	-34.122
31.88	-34.205	8.198	-34.303
31.9	-34.161	8.326	-34.56
31.92	-34.161	8.409	-34.871
31.94	-34.117	8.475	-35.2
31.96	-34.117	8.554	-35.513
31.98	-34.161	8.662	-35.788
32	-34.161	8.799	-36.024
32.02	-34.293	8.954	-36.236
32.04	-34.512	9.12	-36.432
32.06	-34.732	9.292	-36.62
32.08	-35.084	9.462	-36.807
32.1	-35.391	9.628	-36.998
32.12	-35.787	9.791	-37.19
32.14	-36.226	9.957	-37.377
32.16	-36.578	10.128	-37.556
32.18	-36.885	10.298	-37.733
32.2	-37.193	10.462	-37.917
32.22	-37.545	10.611	-38.116
32.24	-37.852	10.734	-38.347
32.26	-38.028	10.814	-38.629
32.28	-38.204	10.849	-38.966
32.3	-38.379	10.852	-39.34
32.32	-38.511	10.836	-39.735
32.34	-38.731	10.803	-40.151
32.36	-38.951	10.752	-40.586
32.38	-39.083	10.691	-41.032
32.4	-39.39	10.623	-41.485
32.42	-39.654	10.547	-41.946
32.44	-39.874	10.453	-42.426
32.46	-40.357	10.331	-42.939
32.48	-40.796	10.176	-43.492
32.5	-41.324	9.97	-44.106
32.52	-41.851	9.692	-44.808
32.54	-42.335	9.349	-45.589
32.56	-42.906	9.003	-46.371
32.58	-43.521	8.742	-47.045
32.6	-44.224	8.594	-47.575
32.62	-44.752	8.495	-48.042
32.64	-45.367	8.355	-48.558
32.66	-46.07	8.162	-49.137
32.68	-46.861	7.979	-49.702
32.7	-47.652	7.86	-50.184
32.72	-48.443	7.793	-50.598
32.74	-49.102	7.738	-50.997
32.76	-49.981	7.666	-51.412
32.78	-50.596	7.583	-51.841
32.8	-51.212	7.487	-52.283
32.82	-51.739	7.383	-52.731
32.84	-52.178	7.297	-53.155
32.86	-52.574	7.257	-53.52
32.88	-52.969	7.252	-53.839
32.9	-53.233	7.228	-54.178
32.92	-53.409	7.131	-54.605
32.94	-53.716	6.956	-55.129
32.96	-53.98	6.747	-55.691
32.98	-54.2	6.555	-56.231
33	-54.463	6.403	-56.718
33.02	-54.815	6.285	-57.16
33.04	-55.123	6.18	-57.583
33.06	-55.474	6.069	-58.01
33.08	-55.914	5.955	-58.439
33.1	-56.397	5.865	-58.835
33.12	-56.924	5.823	-59.169
33.14	-57.496	5.834	-59.434
33.16	-57.979	5.883	-59.649
33.18	-58.594	5.95	-59.838
33.2	-59.122	6.027	-60.013
33.22	-59.737	6.102	-60.186
33.24	-60.176	6.174	-60.362
33.26	-60.572	6.244	-60.538
33.28	-60.879	6.317	-60.706
33.3	-61.187	6.382	-60.882
33.32	-61.231	6.417	-61.092
33.34	-61.231	6.408	-61.355
33.36	-61.319	6.362	-61.662
33.38	-61.363	6.299	-61.987
33.4	-61.407	6.223	-62.325
33.42	-61.407	6.134	-62.678
33.44	-61.451	6.035	-63.04
33.46	-61.627	5.938	-63.396
33.48	-61.758	5.854	-63.733
33.5	-62.022	5.781	-64.054
33.52	-62.374	5.722	-64.355
33.54	-62.637	5.688	-64.621
33.56	-63.077	5.682	-64.85
33.58	-63.56	5.695	-65.052
33.6	-64.044	5.718	-65.239
33.62	-64.571	5.752	-65.408
33.64	-64.922	5.809	-65.547
33.66	-65.406	5.88	-65.665
33.68	-65.626	5.949	-65.783
33.7	-66.065	5.996	-65.925
33.72	-66.241	6.025	-66.087
33.74	-66.373	6.035	-66.27
33.76	-66.461	6.024	-66.476
33.78	-66.548	5.989	-66.709
33.8	-66.592	5.933	-66.966
33.82	-66.636	5.858	-67.243
33.84	-66.636	5.762	-67.543
33.86	-66.724	5.636	-67.879
33.88	-66.856	5.483	-68.245
33.9	-67.032	5.327	-68.612
33.92	-67.208	5.199	-68.94
33.94	-67.339	5.122	-69.203
33.96	-67.603	5.094	-69.4
33.98	-68.043	5.103	-69.549
34	-68.35	5.131	-69.671
34.02	-68.79	5.156	-69.793
34.04	-69.185	5.174	-69.921
34.06	-69.669	5.189	-70.051
34.08	-69.932	5.212	-70.167
34.1	-70.328	5.238	-70.276
34.12	-70.547	5.261	-70.385
34.14	-70.811	5.275	-70.504
34.16	-70.899	5.28	-70.631
34.18	-70.943	5.27	-70.773
34.2	-70.943	5.233	-70.945
34.22	-70.943	5.159	-71.161
34.24	-70.987	5.051	-71.416
34.26	-71.031	4.924	-71.692
34.28	-71.075	4.795	-71.968
34.3	-71.075	4.674	-72.231
34.32	-71.207	4.561	-72.48
34.34	-71.295	4.462	-72.709
34.36	-71.558	4.375	-72.919
34.38	-71.91	4.298	-73.114
34.4	-72.129	4.232	-73.293
34.42	-72.393	4.182	-73.449
34.44	-72.745	4.159	-73.566
34.46	-73.096	4.166	-73.644
34.48	-73.36	4.186	-73.703
34.5	-73.755	4.193	-73.774
34.52	-73.975	4.179	-73.869
34.54	-74.107	4.142	-73.988
34.56	-74.371	4.086	-74.13
34.58	-74.371	4.017	-74.283
34.6	-74.459	3.941	-74.443
34.62	-74.503	3.871	-74.592
34.64	-74.503	3.819	-74.715
34.66	-74.546	3.79	-74.806
34.68	-74.59	3.777	-74.875
34.7	-74.634	3.765	-74.939
34.72	-74.678	3.742	-75.013
34.74	-74.722	3.703	-75.104
34.76	-74.942	3.652	-75.208
34.78	-75.074	3.602	-75.307
34.8	-75.162	3.558	-75.394
34.82	-75.206	3.521	-75.471
34.84	-75.294	3.484	-75.544
34.86	-75.469	3.443	-75.619
34.88	-75.645	3.401	-75.692
34.9	-75.777	3.36	-75.76
34.92	-75.777	3.328	-75.814
34.94	-75.821	3.306	-75.853
34.96	-75.909	3.291	-75.88
34.98	-75.953	3.278	-75.901
35	-76.085	3.259	-75.926
35.02	-76.085	3.234	-75.957
35.04	-76.129	3.202	-75.992
35.06	-76.172	3.166	-76.028
35.08	-76.172	3.127	-76.065
35.1	-76.172	3.083	-76.107
35.12	-76.216	3.032	-76.153
35.14	-76.216	2.978	-76.2
35.16	-76.216	2.928	-76.239
35.18	-76.26	2.887	-76.263
35.2	-76.392	2.855	-76.274
35.22	-76.436	2.827	-76.275
35.24	-76.524	2.797	-76.277
35.26	-76.524	2.762	-76.28
35.28	-76.524	2.724	-76.286
35.3	-76.524	2.68	-76.295
35.32	-76.568	2.628	-76.311
35.34	-76.524	2.57	-76.331
35.36	-76.568	2.509	-76.353
35.38	-76.568	2.45	-76.368
35.4	-76.524	2.401	-76.368
35.42	-76.524	2.362	-76.352
35.44	-76.568	2.335	-76.318
35.46	-76.568	2.316	-76.271
35.48	-76.568	2.301	-76.215
35.5	-76.568	2.284	-76.16
35.52	-76.568	2.259	-76.111
35.54	-76.568	2.224	-76.072
35.56	-76.568	2.177	-76.044
35.58	-76.524	2.12	-76.025
35.6	-76.436	2.058	-76.011
35.62	-76.392	1.991	-75.998
35.64	-76.392	1.925	-75.983
35.66	-76.304	1.863	-75.957
35.68	-76.304	1.81	-75.919
35.7	-76.172	1.77	-75.861
35.72	-76.129	1.742	-75.785
35.74	-76.129	1.72	-75.698
35.76	-76.085	1.7	-75.605
35.78	-76.041	1.679	-75.511
35.8	-76.041	1.66	-75.412
35.82	-75.997	1.646	-75.302
35.84	-75.953	1.636	-75.186
35.86	-75.865	1.623	-75.069
35.88	-75.733	1.606	-74.955
35.9	-75.601	1.584	-74.843
35.92	-75.601	1.56	-74.732
35.94	-75.381	1.538	-74.614
35.96	-75.381	1.512	-74.499
35.98	-75.338	1.485	-74.382
36	-75.03	1.46	-74.259
36.02	-74.986	1.436	-74.133
36.04	-74.81	1.414	-74
36.06	-74.59	1.393	-73.863
36.08	-74.546	1.369	-73.728
36.1	-74.459	1.343	-73.591
36.12	-74.239	1.321	-73.448
36.14	-74.151	1.3	-73.299
36.16	-74.107	1.279	-73.147
36.18	-73.843	1.259	-72.992
36.2	-73.755	1.234	-72.839
36.22	-73.624	1.208	-72.685
36.24	-73.448	1.184	-72.526
36.26	-73.404	1.163	-72.36
36.28	-73.14	1.147	-72.185
36.3	-72.921	1.131	-72.007
36.32	-72.877	1.11	-71.832
36.34	-72.745	1.088	-71.655
36.36	-72.525	1.066	-71.475
36.38	-72.437	1.046	-71.292
36.4	-72.173	1.031	-71.098
36.42	-72.086	1.017	-70.899
36.44	-71.866	1.006	-70.695
36.46	-71.646	0.991	-70.492
36.48	-71.382	0.975	-70.289
36.5	-71.295	0.956	-70.086
36.52	-71.075	0.939	-69.878
36.54	-70.855	0.921	-69.667
36.56	-70.635	0.901	-69.457
36.58	-70.416	0.879	-69.247
36.6	-70.24	0.855	-69.035
36.62	-69.976	0.834	-68.818
36.64	-69.625	0.815	-68.596
36.66	-69.581	0.794	-68.373
36.68	-69.273	0.776	-68.144
36.7	-69.185	0.756	-67.915
36.72	-68.878	0.738	-67.679
36.74	-68.702	0.721	-67.441
36.76	-68.482	0.704	-67.199
36.78	-68.262	0.687	-66.955
36.8	-68.087	0.668	-66.711
36.82	-67.867	0.649	-66.465
36.84	-67.691	0.629	-66.216
36.86	-67.339	0.613	-65.961
36.88	-67.076	0.596	-65.702
36.9	-66.944	0.58	-65.441
36.92	-66.592	0.567	-65.174
36.94	-66.373	0.552	-64.906
36.96	-66.065	0.539	-64.634
36.98	-65.889	0.524	-64.361
37	-65.494	0.51	-64.083
37.02	-65.274	0.496	-63.805
37.04	-64.879	0.483	-63.522
37.06	-64.571	0.468	-63.238
37.08	-64.395	0.453	-62.953
37.1	-64.219	0.437	-62.666
37.12	-63.78	0.425	-62.372
37.14	-63.56	0.412	-62.077
37.16	-63.253	0.398	-61.779
37.18	-63.033	0.382	-61.482
37.2	-62.725	0.365	-61.185
37.22	-62.374	0.349	-60.883
37.24	-62.154	0.335	-60.577
37.26	-61.802	0.327	-60.26
37.28	-61.539	0.324	-59.935
37.3	-61.187	0.325	-59.603
37.32	-61.055	0.322	-59.273
37.34	-60.704	0.316	-58.944
37.36	-60.484	0.303	-58.623
37.38	-60.176	0.286	-58.302
37.4	-60.045	0.268	-57.983
37.42	-59.605	0.252	-57.657
37.44	-59.385	0.235	-57.331
37.46	-59.034	0.218	-57.002
37.48	-58.726	0.201	-56.672
37.5	-58.243	0.185	-56.337
37.52	-57.847	0.168	-56.002
37.54	-57.408	0.15	-55.665
37.56	-57.012	0.131	-55.328
37.58	-56.705	0.11	-54.991
37.6	-56.309	0.088	-54.654
37.62	-55.958	0.064	-54.317
37.64	-55.65	0.038	-53.979
37.66	-55.211	0.015	-53.636
37.68	-54.991	-0.007	-53.29
37.7	-54.595	-0.026	-52.937
37.72	-54.288	-0.045	-52.583
37.74	-53.936	-0.066	-52.229
37.76	-53.541	-0.088	-51.875
37.78	-53.233	-0.112	-51.52
37.8	-52.925	-0.133	-51.16
37.82	-52.662	-0.151	-50.794
37.84	-52.266	-0.167	-50.424
37.86	-51.915	-0.188	-50.057
37.88	-51.563	-0.214	-49.697
37.9	-51.255	-0.248	-49.342
37.92	-50.904	-0.283	-48.988
37.94	-50.508	-0.317	-48.631
37.96	-50.157	-0.351	-48.271
37.98	-49.761	-0.386	-47.911
38	-49.454	-0.423	-47.551
38.02	-49.058	-0.46	-47.191
38.04	-48.751	-0.501	-46.832
38.06	-48.311	-0.546	-46.477
38.08	-47.96	-0.603	-46.135
38.1	-47.564	-0.674	-45.809
38.12	-47.169	-0.757	-45.496
38.14	-46.861	-0.853	-45.198
38.16	-46.465	-0.962	-44.915
38.18	-46.158	-1.088	-44.65
38.2	-45.762	-1.228	-44.401
38.22	-45.499	-1.381	-44.167
38.24	-45.191	-1.542	-43.941
38.26	-44.883	-1.709	-43.722
38.28	-44.664	-1.888	-43.515
38.3	-44.4	-2.082	-43.326
38.32	-44.092	-2.293	-43.157
38.34	-44.004	-2.521	-43.006
38.36	-43.785	-2.752	-42.859
38.38	-43.565	-2.979	-42.704
38.4	-43.433	-3.192	-42.53
38.42	-43.213	-3.381	-42.326
38.44	-43.038	-3.548	-42.091
38.46	-42.95	-3.697	-41.834
38.48	-42.818	-3.839	-41.565
38.5	-42.598	-3.974	-41.287
38.52	-42.554	-4.102	-40.998
38.54	-42.335	-4.212	-40.686
38.56	-42.203	-4.312	-40.359
38.58	-41.895	-4.407	-40.025
38.6	-41.588	-4.503	-39.692
38.62	-41.412	-4.606	-39.365
38.64	-41.104	-4.713	-39.041
38.66	-40.709	-4.823	-38.72
38.68	-40.445	-4.939	-38.406
38.7	-40.137	-5.068	-38.106
38.72	-39.698	-5.208	-37.82
38.74	-39.434	-5.348	-37.532
38.76	-39.302	-5.465	-37.214
38.78	-39.171	-5.551	-36.855
38.8	-39.127	-5.622	-36.478
38.82	-38.775	-5.708	-36.118
38.84	-38.423	-5.829	-35.8
38.86	-38.072	-5.979	-35.517
38.88	-37.632	-6.135	-35.24
38.9	-37.149	-6.28	-34.949
38.92	-36.666	-6.416	-34.645
38.94	-36.182	-6.555	-34.344
38.96	-35.743	-6.708	-34.06
38.98	-35.215	-6.868	-33.784
39	-34.776	-7.014	-33.488
39.02	-34.337	-7.122	-33.145
39.04	-33.985	-7.185	-32.744
39.06	-33.677	-7.212	-32.298
39.08	-33.37	-7.216	-31.822
39.1	-33.062	-7.198	-31.317
39.12	-32.798	-7.146	-30.769
39.14	-32.579	-7.046	-30.16
39.16	-32.227	-6.896	-29.487
39.18	-31.876	-6.71	-28.769
39.2	-31.656	-6.509	-28.031
39.22	-31.216	-6.314	-27.3
39.24	-30.865	-6.156	-26.615
39.26	-30.294	-6.062	-26.009
39.28	-29.81	-6.054	-25.509
39.3	-29.195	-6.125	-25.108
39.32	-28.36	-6.244	-24.766
39.34	-27.701	-6.368	-24.43
39.36	-26.91	-6.466	-24.06
39.38	-26.163	-6.535	-23.653
39.4	-25.328	-6.584	-23.22
39.42	-24.581	-6.624	-22.777
39.44	-23.965	-6.666	-22.334
39.46	-23.174	-6.72	-21.907
39.48	-22.647	-6.797	-21.507
39.5	-22.252	-6.889	-21.126
39.52	-21.856	-6.98	-20.743
39.54	-21.504	-7.054	-20.339
39.56	-21.329	-7.107	-19.907
39.58	-20.977	-7.13	-19.437
39.6	-20.801	-7.118	-18.925
39.62	-20.538	-7.073	-18.369
39.64	-20.406	-7.011	-17.792
39.66	-20.054	-6.953	-17.22
39.68	-19.791	-6.916	-16.673
39.7	-19.395	-6.891	-16.142
39.72	-18.956	-6.857	-15.6
39.74	-18.384	-6.79	-15.014
39.76	-17.901	-6.677	-14.373
39.78	-17.374	-6.536	-13.695
39.8	-16.714	-6.411	-13.037
39.82	-16.099	-6.356	-12.466
39.84	-15.352	-6.394	-12.012
39.86	-14.869	-6.51	-11.655
39.88	-13.99	-6.657	-11.336
39.9	-13.419	-6.792	-11.003
39.92	-12.671	-6.898	-10.633
39.94	-11.924	-6.979	-10.232
39.96	-11.177	-7.047	-9.813
39.98	-10.518	-7.106	-9.385
[truncated: 8,002 more rows]
