# Supplementary material for: Interactive Compliance Control of a Wrist Rehabilitation Device (WReD) with Enhanced Training Safety
Source: J Healthc Eng. 2019 Feb 18;2019:6537848. doi: 10.1155/2019/6537848 (PMC6409001; doi:10.1155/2019/6537848)
Supplement: Supplementary Materials — The original data of Experiment 1 to Experiment 4 are included. The data file of each experiment contains four columns named Time (second), Desired Angle (degree), Interaction Torque (Nm), and Measured Angle (degree). Figures 4–7 were derived from the original data of Experiment 1 to Experiment 4 by using MATLAB. Below are the descriptions of the four experiments: Experiment 1: the trajectory tracking responses with zero load. Experiment 2: the trajectory tracking responses with passive training. Experiment 3: the trajectory tracking responses with K = 0.8. Experiment 4: the trajectory tracking responses with K = 1.6. [file 6537848.f1.zip › 6537848.f1/Experiment 4.xls]

## Sheet: Alldata_passive
Time	Desired	Interaction Torque	Measured
0	0.424	0.544	0.34
0.02	0.424	0.538	0.745
0.04	0.424	0.511	1.136
0.06	0.424	0.443	1.502
0.08	0.424	0.33	1.84
0.1	0.424	0.194	2.163
0.12	0.468	0.078	2.499
0.14	0.6	0.005	2.861
0.16	0.82	-0.031	3.247
0.18	1.083	-0.051	3.642
0.2	1.435	-0.07	4.038
0.22	1.918	-0.092	4.431
0.24	2.402	-0.116	4.824
0.26	2.709	-0.144	5.214
0.28	3.237	-0.18	5.598
0.3	3.676	-0.225	5.976
0.32	4.072	-0.278	6.35
0.34	4.687	-0.335	6.72
0.36	5.302	-0.392	7.091
0.38	5.742	-0.447	7.462
0.4	6.225	-0.499	7.835
0.42	6.708	-0.55	8.208
0.44	7.192	-0.603	8.58
0.46	7.499	-0.658	8.949
0.48	7.719	-0.713	9.319
0.5	8.203	-0.765	9.69
0.52	8.598	-0.812	10.064
0.54	8.642	-0.856	10.439
0.56	8.994	-0.9	10.814
0.58	9.301	-0.944	11.188
0.6	9.609	-0.986	11.563
0.62	9.829	-1.026	11.939
0.64	10.356	-1.066	12.315
0.66	10.839	-1.104	12.691
0.68	11.103	-1.143	13.066
0.7	11.367	-1.181	13.441
0.72	11.674	-1.218	13.816
0.74	12.246	-1.255	14.191
0.76	12.729	-1.291	14.566
0.78	12.993	-1.328	14.939
0.8	13.3	-1.367	15.311
0.82	13.871	-1.409	15.68
0.84	14.223	-1.452	16.047
0.86	14.838	-1.493	16.415
0.88	15.058	-1.528	16.787
0.9	15.454	-1.558	17.161
0.92	15.805	-1.583	17.537
0.94	16.288	-1.608	17.913
0.96	16.64	-1.635	18.286
0.98	16.86	-1.664	18.657
1	17.123	-1.693	19.028
1.02	17.607	-1.718	19.401
1.04	17.827	-1.737	19.775
1.06	18.222	-1.756	20.15
1.08	18.705	-1.778	20.522
1.1	18.925	-1.805	20.89
1.12	19.453	-1.838	21.253
1.14	19.848	-1.874	21.614
1.16	20.156	-1.91	21.973
1.18	20.727	-1.95	22.329
1.2	21.166	-1.994	22.682
1.22	21.254	-2.041	23.031
1.24	21.65	-2.095	23.376
1.26	22.133	-2.154	23.717
1.28	22.353	-2.217	24.053
1.3	22.617	-2.284	24.387
1.32	23.1	-2.35	24.72
1.34	23.671	-2.413	25.054
1.36	23.715	-2.473	25.389
1.38	24.199	-2.536	25.721
1.4	24.55	-2.601	26.05
1.42	24.814	-2.665	26.379
1.44	25.209	-2.726	26.709
1.46	25.517	-2.776	27.044
1.48	25.956	-2.816	27.385
1.5	26.088	-2.843	27.732
1.52	26.484	-2.866	28.081
1.54	26.835	-2.885	28.431
1.56	27.143	-2.902	28.782
1.58	27.319	-2.914	29.134
1.6	27.67	-2.924	29.487
1.62	28.373	-2.931	29.839
1.64	28.417	-2.933	30.194
1.66	28.813	-2.936	30.547
1.68	29.208	-2.938	30.899
1.7	29.384	-2.941	31.25
1.72	29.912	-2.944	31.599
1.74	30.175	-2.94	31.95
1.76	30.615	-2.929	32.306
1.78	31.054	-2.91	32.665
1.8	31.318	-2.886	33.025
1.82	31.713	-2.865	33.383
1.84	31.889	-2.844	33.738
1.86	32.548	-2.828	34.089
1.88	32.944	-2.814	34.438
1.9	33.032	-2.806	34.782
1.92	33.427	-2.812	35.115
1.94	34.042	-2.835	35.436
1.96	34.262	-2.868	35.75
1.98	34.702	-2.912	36.055
2	35.141	-2.962	36.355
2.02	35.361	-3.016	36.651
2.04	35.756	-3.077	36.941
2.06	35.976	-3.141	37.227
2.08	36.459	-3.212	37.508
2.1	36.547	-3.282	37.788
2.12	36.943	-3.355	38.064
2.14	37.162	-3.432	38.336
2.16	37.514	-3.518	38.601
2.18	37.558	-3.609	38.861
2.2	37.734	-3.707	39.116
2.22	38.173	-3.813	39.364
2.24	38.393	-3.929	39.603
2.26	38.569	-4.057	39.834
2.28	38.92	-4.187	40.061
2.3	39.008	-4.305	40.295
2.32	39.404	-4.414	40.532
2.34	39.667	-4.525	40.766
2.36	39.975	-4.652	40.989
2.38	40.195	-4.801	41.196
2.4	40.458	-4.967	41.391
2.42	40.766	-5.14	41.58
2.44	40.854	-5.311	41.768
2.46	41.074	-5.47	41.962
2.48	41.249	-5.611	42.165
2.5	41.469	-5.73	42.381
2.52	41.733	-5.823	42.611
2.54	42.128	-5.889	42.856
2.56	42.304	-5.932	43.113
2.58	42.348	-5.963	43.375
2.6	42.524	-5.993	43.637
2.62	42.831	-6.021	43.899
2.64	42.963	-6.036	44.166
2.66	43.183	-6.036	44.441
2.68	43.183	-6.021	44.723
2.7	43.491	-6.008	45.002
2.72	43.798	-6.007	45.272
2.74	44.062	-6.033	45.523
2.76	44.282	-6.094	45.75
2.78	44.677	-6.194	45.951
2.8	44.941	-6.321	46.133
2.82	45.292	-6.462	46.304
2.84	45.6	-6.605	46.472
2.86	45.908	-6.741	46.642
2.88	46.083	-6.859	46.822
2.9	46.479	-6.954	47.014
2.92	46.567	-7.025	47.219
2.94	46.874	-7.088	47.427
2.96	47.05	-7.146	47.635
2.98	47.226	-7.199	47.846
3	47.314	-7.237	48.063
3.02	47.534	-7.265	48.284
3.04	47.709	-7.29	48.506
3.06	47.753	-7.316	48.725
3.08	47.841	-7.342	48.941
3.1	48.193	-7.362	49.159
3.12	48.193	-7.37	49.383
3.14	48.5	-7.383	49.601
3.16	48.632	-7.419	49.802
3.18	48.896	-7.496	49.976
3.2	49.116	-7.611	50.125
3.22	49.379	-7.749	50.256
3.24	49.555	-7.889	50.384
3.26	49.819	-8.009	50.522
3.28	50.17	-8.094	50.68
3.3	50.478	-8.142	50.859
3.32	50.478	-8.168	51.05
3.34	50.742	-8.195	51.238
3.36	50.829	-8.235	51.415
3.38	50.961	-8.296	51.577
3.4	51.181	-8.366	51.731
3.42	51.357	-8.426	51.89
3.44	51.357	-8.462	52.06
3.46	51.401	-8.48	52.24
3.48	51.752	-8.494	52.42
3.5	51.752	-8.506	52.599
3.52	51.972	-8.525	52.771
3.54	52.148	-8.555	52.935
3.56	52.368	-8.599	53.087
3.58	52.412	-8.649	53.233
3.6	52.719	-8.698	53.378
3.62	52.763	-8.735	53.527
3.64	52.763	-8.762	53.681
3.66	53.159	-8.78	53.837
3.68	53.334	-8.786	53.999
3.7	53.554	-8.787	54.162
3.72	53.642	-8.788	54.323
3.74	53.994	-8.788	54.481
3.76	54.037	-8.774	54.646
3.78	54.433	-8.739	54.822
3.8	54.477	-8.667	55.019
3.82	54.521	-8.563	55.233
3.84	54.916	-8.449	55.451
3.86	55.18	-8.351	55.657
3.88	55.224	-8.292	55.835
3.9	55.4	-8.279	55.983
3.92	55.4	-8.292	56.112
3.94	55.62	-8.315	56.232
3.96	55.839	-8.336	56.351
3.98	55.927	-8.36	56.466
4	56.103	-8.401	56.568
4.02	56.191	-8.456	56.659
4.04	56.454	-8.517	56.743
4.06	56.542	-8.568	56.832
4.08	56.762	-8.602	56.928
4.1	56.806	-8.606	57.041
4.12	56.982	-8.567	57.177
4.14	57.026	-8.484	57.339
4.16	57.026	-8.378	57.514
4.18	57.114	-8.279	57.681
4.2	57.158	-8.202	57.832
4.22	57.289	-8.142	57.969
4.24	57.465	-8.085	58.103
4.26	57.509	-8.024	58.236
4.28	57.861	-7.968	58.364
4.3	57.905	-7.924	58.482
4.32	58.037	-7.905	58.582
4.34	58.344	-7.91	58.664
4.36	58.432	-7.928	58.736
4.38	58.476	-7.954	58.8
4.4	58.74	-7.987	58.857
4.42	58.828	-8.02	58.912
4.44	58.871	-8.043	58.97
4.46	58.959	-8.053	59.034
4.48	59.047	-8.049	59.104
4.5	59.135	-8.038	59.176
4.52	59.223	-8.02	59.25
4.54	59.267	-7.993	59.327
4.56	59.443	-7.958	59.406
4.58	59.443	-7.914	59.489
4.6	59.487	-7.864	59.573
4.62	59.487	-7.808	59.658
4.64	59.487	-7.748	59.742
4.66	59.575	-7.693	59.822
4.68	59.575	-7.652	59.89
4.7	59.619	-7.628	59.944
4.72	59.838	-7.608	59.994
4.74	59.838	-7.562	60.057
4.76	60.058	-7.486	60.136
4.78	60.058	-7.393	60.224
4.8	60.102	-7.317	60.299
4.82	60.102	-7.284	60.343
4.84	60.102	-7.306	60.352
4.86	60.278	-7.374	60.328
4.88	60.366	-7.452	60.296
4.9	60.41	-7.493	60.285
4.92	60.454	-7.473	60.309
4.94	60.497	-7.413	60.355
4.96	60.585	-7.365	60.392
4.98	60.585	-7.361	60.398
5	60.629	-7.39	60.381
5.02	60.673	-7.417	60.363
5.04	60.629	-7.424	60.355
5.06	60.629	-7.42	60.351
5.08	60.629	-7.422	60.341
5.1	60.497	-7.427	60.326
5.12	60.497	-7.429	60.311
5.14	60.497	-7.421	60.299
5.16	60.497	-7.405	60.29
5.18	60.497	-7.388	60.278
5.2	60.497	-7.376	60.262
5.22	60.497	-7.366	60.241
5.24	60.497	-7.354	60.219
5.26	60.497	-7.327	60.204
5.28	60.497	-7.281	60.198
5.3	60.497	-7.217	60.201
5.32	60.454	-7.138	60.211
5.34	60.454	-7.045	60.227
5.36	60.454	-6.943	60.245
5.38	60.366	-6.842	60.261
5.4	60.366	-6.752	60.267
5.42	60.366	-6.672	60.265
5.44	60.366	-6.594	60.259
5.46	60.41	-6.518	60.248
5.48	60.41	-6.453	60.229
5.5	60.454	-6.41	60.193
5.52	60.41	-6.389	60.142
5.54	60.322	-6.38	60.079
5.56	60.322	-6.376	60.012
5.58	60.322	-6.369	59.943
5.6	60.278	-6.353	59.878
5.62	60.278	-6.323	59.819
5.64	60.278	-6.279	59.767
5.66	60.234	-6.228	59.715
5.68	60.19	-6.179	59.66
5.7	60.102	-6.134	59.601
5.72	60.014	-6.088	59.539
5.74	59.97	-6.041	59.476
5.76	59.97	-5.996	59.408
5.78	59.97	-5.957	59.335
5.8	59.794	-5.925	59.255
5.82	59.706	-5.905	59.165
5.84	59.662	-5.898	59.063
5.86	59.662	-5.905	58.951
5.88	59.575	-5.917	58.834
5.9	59.487	-5.93	58.713
5.92	59.443	-5.945	58.588
5.94	59.311	-5.967	58.457
5.96	59.003	-5.997	58.318
5.98	59.003	-6.035	58.172
6	58.959	-6.069	58.026
6.02	58.696	-6.094	57.883
6.04	58.52	-6.117	57.738
6.06	58.476	-6.144	57.589
6.08	58.3	-6.173	57.436
6.1	57.993	-6.194	57.286
6.12	57.949	-6.207	57.138
6.14	57.817	-6.209	56.995
6.16	57.597	-6.205	56.853
6.18	57.509	-6.2	56.71
6.2	57.421	-6.194	56.564
6.22	57.377	-6.189	56.416
6.24	57.026	-6.177	56.27
6.26	56.982	-6.158	56.125
6.28	56.85	-6.12	55.99
6.3	56.85	-6.049	55.873
6.32	56.498	-5.936	55.78
6.34	56.454	-5.797	55.702
6.36	56.235	-5.649	55.626
6.38	56.015	-5.51	55.543
6.4	55.971	-5.384	55.449
6.42	55.971	-5.265	55.348
6.44	55.927	-5.15	55.243
6.46	55.839	-5.043	55.13
6.48	55.707	-4.951	55.005
6.5	55.62	-4.875	54.869
6.52	55.444	-4.809	54.723
6.54	55.268	-4.743	54.575
6.56	55.224	-4.671	54.429
6.58	55.048	-4.589	54.287
6.6	55.004	-4.505	54.144
6.62	54.96	-4.42	54
6.64	54.785	-4.328	53.857
6.66	54.609	-4.228	53.717
6.68	54.477	-4.122	53.579
6.7	54.301	-4.023	53.434
6.72	54.125	-3.942	53.275
6.74	53.862	-3.881	53.102
6.76	53.818	-3.836	52.917
6.78	53.774	-3.793	52.729
6.8	53.554	-3.741	52.543
6.82	53.334	-3.681	52.361
6.84	53.159	-3.619	52.177
6.86	53.071	-3.564	51.987
6.88	52.895	-3.52	51.789
6.9	52.763	-3.491	51.579
6.92	52.675	-3.472	51.359
6.94	52.368	-3.454	51.138
6.96	52.236	-3.422	50.923
6.98	52.104	-3.368	50.72
7	51.884	-3.302	50.522
7.02	51.621	-3.246	50.316
7.04	51.357	-3.211	50.095
7.06	50.961	-3.188	49.864
7.08	50.742	-3.156	49.637
7.1	50.698	-3.107	49.418
7.12	50.434	-3.044	49.206
7.14	50.038	-2.984	48.99
7.16	49.995	-2.937	48.764
7.18	49.687	-2.895	48.533
7.2	49.423	-2.852	48.301
7.22	49.379	-2.803	48.07
7.24	49.028	-2.747	47.842
7.26	48.896	-2.693	47.611
7.28	48.808	-2.642	47.375
7.3	48.412	-2.594	47.136
7.32	48.193	-2.554	46.89
7.34	47.929	-2.515	46.641
7.36	47.797	-2.472	46.394
7.38	47.446	-2.414	46.153
7.4	47.226	-2.345	45.917
7.42	47.006	-2.27	45.684
7.44	46.787	-2.193	45.45
7.46	46.479	-2.12	45.211
7.48	46.215	-2.056	44.965
7.5	45.952	-2.002	44.71
7.52	45.644	-1.958	44.448
7.54	45.512	-1.922	44.18
7.56	45.468	-1.888	43.907
7.58	45.161	-1.855	43.633
7.6	44.941	-1.826	43.354
7.62	44.457	-1.798	43.073
7.64	44.326	-1.773	42.789
7.66	44.106	-1.744	42.505
7.68	43.622	-1.71	42.222
7.7	43.359	-1.676	41.938
7.72	43.183	-1.64	41.653
7.74	42.963	-1.601	41.369
7.76	42.524	-1.559	41.085
7.78	42.172	-1.518	40.798
7.8	41.909	-1.48	40.508
7.82	41.777	-1.447	40.213
7.84	41.381	-1.416	39.915
7.86	41.118	-1.391	39.612
7.88	40.81	-1.369	39.305
7.9	40.546	-1.35	38.995
7.92	40.414	-1.33	38.684
7.94	39.931	-1.307	38.374
7.96	39.579	-1.282	38.063
7.98	39.536	-1.257	37.75
8	39.096	-1.227	37.439
8.02	38.788	-1.196	37.127
8.04	38.613	-1.169	36.812
8.06	38.129	-1.146	36.492
8.08	37.69	-1.133	36.164
8.1	37.558	-1.129	35.83
8.12	37.294	-1.125	35.494
8.14	36.811	-1.118	35.158
8.16	36.459	-1.106	34.825
8.18	36.108	-1.087	34.494
8.2	35.888	-1.064	34.164
8.22	35.449	-1.039	33.834
8.24	35.229	-1.019	33.499
8.26	34.789	-1.001	33.163
8.28	34.57	-0.984	32.823
8.3	34.13	-0.967	32.483
8.32	33.911	-0.954	32.139
8.34	33.647	-0.945	31.791
8.36	33.251	-0.941	31.439
8.38	33.032	-0.94	31.084
8.4	32.636	-0.937	30.729
8.42	32.285	-0.929	30.375
8.44	31.845	-0.913	30.025
8.46	31.362	-0.889	29.679
8.48	31.318	-0.864	29.333
8.5	30.834	-0.835	28.988
8.52	30.615	-0.808	28.64
8.54	30.175	-0.78	28.292
8.56	29.736	-0.754	27.941
8.58	29.296	-0.732	27.587
8.6	28.989	-0.715	27.229
8.62	28.549	-0.7	26.868
8.64	28.198	-0.683	26.507
8.66	27.846	-0.666	26.146
8.68	27.758	-0.65	25.782
8.7	27.319	-0.635	25.418
8.72	26.967	-0.622	25.05
8.74	26.528	-0.608	24.683
8.76	26.176	-0.592	24.315
8.78	25.825	-0.575	23.948
8.8	25.605	-0.557	23.58
8.82	25.297	-0.537	23.212
8.84	24.682	-0.516	22.844
8.86	24.506	-0.499	22.473
8.88	24.155	-0.484	22.099
8.9	23.496	-0.469	21.725
8.92	23.276	-0.456	21.348
8.94	22.924	-0.441	20.972
8.96	22.441	-0.428	20.594
8.98	22.089	-0.422	20.21
9	21.694	-0.42	19.824
9.02	21.298	-0.416	19.437
9.04	21.079	-0.407	19.054
9.06	20.551	-0.391	18.673
9.08	20.287	-0.376	18.291
9.1	19.848	-0.362	17.908
9.12	19.496	-0.349	17.524
9.14	19.101	-0.336	17.139
9.16	18.574	-0.324	16.752
9.18	18.266	-0.318	16.362
9.2	17.914	-0.315	15.968
9.22	17.651	-0.312	15.574
9.24	17.079	-0.307	15.181
9.26	16.684	-0.299	14.788
9.28	16.376	-0.292	14.395
9.3	16.025	-0.285	14.001
9.32	15.497	-0.277	13.607
9.34	15.19	-0.267	13.214
9.36	14.926	-0.255	12.822
9.38	14.443	-0.243	12.429
9.4	14.135	-0.233	12.034
9.42	13.871	-0.224	11.638
9.44	13.388	-0.213	11.243
9.46	12.905	-0.197	10.851
9.48	12.421	-0.178	10.46
9.5	12.114	-0.157	10.07
9.52	11.63	-0.138	9.678
9.54	11.235	-0.126	9.282
9.56	10.751	-0.12	8.882
9.58	10.4	-0.118	8.478
9.6	9.829	-0.117	8.073
9.62	9.433	-0.117	7.668
9.64	9.125	-0.118	7.262
9.66	8.774	-0.118	6.856
9.68	8.378	-0.118	6.45
9.7	8.027	-0.117	6.044
9.72	7.631	-0.116	5.638
9.74	7.324	-0.116	5.231
9.76	6.796	-0.116	4.824
9.78	6.445	-0.114	4.418
9.8	6.049	-0.109	4.013
9.82	5.654	-0.102	3.61
9.84	5.302	-0.094	3.207
9.86	4.819	-0.087	2.804
9.88	4.423	-0.083	2.398
9.9	4.072	-0.08	1.992
9.92	3.632	-0.078	1.584
9.94	3.237	-0.075	1.178
9.96	2.797	-0.068	0.774
9.98	2.314	-0.059	0.372
10	1.918	-0.048	-0.03
10.02	1.567	-0.039	-0.433
10.04	1.039	-0.031	-0.836
10.06	0.644	-0.026	-1.241
10.08	0.248	-0.023	-1.648
10.1	-0.103	-0.022	-2.526
10.12	-0.499	-0.022	-3.029
10.14	-0.938	-0.021	-3.53
10.16	-1.246	-0.018	-4.031
10.18	-1.685	-0.012	-4.529
10.2	-2.125	-0.007	-5.028
10.22	-2.608	-0.003	-5.527
10.24	-3.179	0.002	-6.025
10.26	-3.795	0.008	-6.522
10.28	-4.366	0.019	-7.016
10.3	-4.893	0.033	-7.508
10.32	-5.377	0.05	-7.998
10.34	-6.124	0.068	-8.486
10.36	-6.519	0.086	-8.975
10.38	-7.266	0.101	-9.465
10.4	-7.75	0.112	-9.957
10.42	-8.321	0.121	-10.449
10.44	-8.892	0.131	-10.941
10.46	-9.376	0.144	-11.431
10.48	-9.727	0.158	-11.919
10.5	-10.211	0.172	-12.408
10.52	-10.65	0.185	-12.895
10.54	-11.133	0.201	-13.381
10.56	-11.485	0.221	-13.864
10.58	-12.012	0.242	-14.345
10.6	-12.452	0.261	-14.828
10.62	-12.847	0.275	-15.312
10.64	-13.463	0.288	-15.797
10.66	-13.858	0.303	-16.28
10.68	-14.297	0.32	-16.76
10.7	-14.869	0.339	-17.24
10.72	-15.396	0.356	-17.719
10.74	-15.836	0.372	-18.198
10.76	-16.319	0.386	-18.679
10.78	-16.846	0.397	-19.16
10.8	-17.242	0.407	-19.641
10.82	-17.813	0.417	-20.121
10.84	-18.296	0.431	-20.598
10.86	-18.736	0.448	-21.072
10.88	-19.263	0.466	-21.545
10.9	-19.747	0.48	-22.019
10.92	-20.186	0.492	-22.494
10.94	-20.67	0.503	-22.969
10.96	-21.109	0.516	-23.441
10.98	-21.592	0.535	-23.909
11	-21.988	0.557	-24.373
11.02	-22.471	0.58	-24.836
11.04	-22.911	0.6	-25.301
11.06	-23.482	0.614	-25.767
11.08	-23.965	0.625	-26.235
11.1	-24.493	0.639	-26.7
11.12	-24.976	0.658	-27.16
11.14	-25.504	0.684	-27.615
11.16	-25.943	0.716	-28.066
11.18	-26.514	0.747	-28.515
11.2	-26.954	0.775	-28.966
11.22	-27.305	0.797	-29.418
11.24	-27.921	0.815	-29.873
11.26	-28.36	0.836	-30.324
11.28	-28.843	0.861	-30.772
11.3	-29.195	0.89	-31.216
11.32	-29.678	0.919	-31.658
11.34	-30.162	0.95	-32.098
11.36	-30.557	0.986	-32.534
11.38	-30.909	1.028	-32.964
11.4	-31.392	1.07	-33.394
11.42	-31.832	1.106	-33.825
11.44	-32.271	1.135	-34.26
11.46	-32.667	1.156	-34.698
11.48	-33.106	1.173	-35.137
11.5	-33.633	1.188	-35.577
11.52	-34.073	1.204	-36.014
11.54	-34.38	1.225	-36.447
11.56	-34.82	1.25	-36.875
11.58	-35.347	1.278	-37.3
11.6	-35.743	1.309	-37.722
11.62	-36.27	1.341	-38.142
11.64	-36.71	1.381	-38.555
11.66	-37.149	1.433	-38.959
11.68	-37.545	1.498	-39.354
11.7	-38.028	1.57	-39.742
11.72	-38.423	1.644	-40.128
11.74	-38.775	1.714	-40.514
11.76	-39.171	1.776	-40.904
11.78	-39.566	1.83	-41.297
11.8	-39.962	1.874	-41.695
11.82	-40.357	1.904	-42.099
11.84	-40.796	1.921	-42.511
11.86	-41.104	1.933	-42.924
11.88	-41.5	1.948	-43.332
11.9	-41.895	1.978	-43.73
11.92	-42.335	2.02	-44.119
11.94	-42.686	2.069	-44.501
11.96	-43.126	2.118	-44.882
11.98	-43.565	2.167	-45.261
12	-43.917	2.217	-45.637
12.02	-44.356	2.264	-46.013
12.04	-44.752	2.307	-46.39
12.06	-45.147	2.347	-46.767
12.08	-45.587	2.389	-47.141
12.1	-45.938	2.436	-47.51
12.12	-46.334	2.486	-47.875
12.14	-46.641	2.539	-48.236
12.16	-47.081	2.599	-48.591
12.18	-47.432	2.67	-48.937
12.2	-47.784	2.753	-49.273
12.22	-48.135	2.846	-49.602
12.24	-48.487	2.943	-49.925
12.26	-48.795	3.04	-50.247
12.28	-49.146	3.131	-50.57
12.3	-49.542	3.218	-50.894
12.32	-49.849	3.311	-51.212
12.34	-50.157	3.415	-51.52
12.36	-50.508	3.522	-51.825
12.38	-50.816	3.613	-52.138
12.4	-51.124	3.672	-52.469
12.42	-51.475	3.696	-52.819
12.44	-51.783	3.695	-53.183
12.46	-52.134	3.684	-53.551
12.48	-52.442	3.675	-53.915
12.5	-52.794	3.677	-54.271
12.52	-53.145	3.68	-54.623
12.54	-53.409	3.669	-54.982
12.56	-53.804	3.635	-55.353
12.58	-54.112	3.592	-55.727
12.6	-54.463	3.561	-56.092
12.62	-54.771	3.546	-56.444
12.64	-55.211	3.533	-56.793
12.66	-55.65	3.506	-57.148
12.68	-55.958	3.464	-57.51
12.7	-56.353	3.418	-57.873
12.72	-56.705	3.378	-58.229
12.74	-57.188	3.345	-58.578
12.76	-57.54	3.32	-58.921
12.78	-57.935	3.299	-59.257
12.8	-58.287	3.286	-59.587
12.82	-58.638	3.284	-59.908
12.84	-58.946	3.294	-60.219
12.86	-59.297	3.308	-60.524
12.88	-59.561	3.322	-60.827
12.9	-59.869	3.331	-61.13
12.92	-60.22	3.34	-61.432
12.94	-60.528	3.351	-61.729
12.96	-60.836	3.361	-62.025
12.98	-61.143	3.365	-62.321
13	-61.539	3.366	-62.618
13.02	-61.846	3.372	-62.908
13.04	-62.11	3.39	-63.188
13.06	-62.33	3.413	-63.463
13.08	-62.681	3.429	-63.74
13.1	-62.989	3.43	-64.023
13.12	-63.209	3.418	-64.311
13.14	-63.472	3.4	-64.601
13.16	-63.78	3.387	-64.886
13.18	-64.088	3.388	-65.158
13.2	-64.351	3.409	-65.416
13.22	-64.571	3.453	-65.656
13.24	-64.747	3.529	-65.874
13.26	-65.054	3.643	-66.065
13.28	-65.362	3.802	-66.226
13.3	-65.626	3.998	-66.361
13.32	-65.757	4.224	-66.474
13.34	-66.021	4.477	-66.568
13.36	-66.153	4.76	-66.64
13.38	-66.285	5.066	-66.695
13.4	-66.373	5.374	-66.746
13.42	-66.373	5.656	-66.81
13.44	-66.373	5.897	-66.897
13.46	-66.373	6.102	-67.005
13.48	-66.373	6.286	-67.122
13.5	-66.373	6.458	-67.244
13.52	-66.504	6.617	-67.372
13.54	-66.548	6.762	-67.505
13.56	-66.768	6.889	-67.647
13.58	-66.944	6.998	-67.797
13.6	-67.076	7.083	-67.959
13.62	-67.339	7.136	-68.139
13.64	-67.647	7.156	-68.336
13.66	-67.867	7.154	-68.544
13.68	-68.043	7.143	-68.755
13.7	-68.262	7.131	-68.964
13.72	-68.526	7.121	-69.168
13.74	-68.79	7.12	-69.364
13.76	-68.834	7.139	-69.544
13.78	-69.053	7.182	-69.707
13.8	-69.229	7.248	-69.852
13.82	-69.361	7.325	-69.988
13.84	-69.537	7.401	-70.12
13.86	-69.625	7.478	-70.25
13.88	-69.976	7.557	-70.376
13.9	-69.976	7.641	-70.495
13.92	-70.108	7.716	-70.617
13.94	-70.328	7.771	-70.748
13.96	-70.504	7.8	-70.893
13.98	-70.679	7.805	-71.05
14	-70.679	7.796	-71.212
14.02	-70.987	7.782	-71.375
14.04	-71.163	7.78	-71.527
14.06	-71.207	7.796	-71.664
14.08	-71.338	7.829	-71.789
14.1	-71.514	7.869	-71.905
14.12	-71.558	7.907	-72.02
14.14	-71.69	7.933	-72.14
14.16	-71.778	7.949	-72.263
14.18	-71.91	7.96	-72.385
14.2	-72.129	7.974	-72.503
14.22	-72.173	8.001	-72.61
14.24	-72.305	8.045	-72.702
14.26	-72.525	8.107	-72.781
14.28	-72.569	8.178	-72.851
14.3	-72.745	8.241	-72.923
14.32	-72.833	8.294	-72.997
14.34	-73.008	8.341	-73.073
14.36	-73.052	8.39	-73.145
14.38	-73.14	8.441	-73.212
14.4	-73.228	8.489	-73.278
14.42	-73.228	8.528	-73.345
14.44	-73.228	8.553	-73.419
14.46	-73.272	8.561	-73.501
14.48	-73.492	8.55	-73.591
14.5	-73.536	8.527	-73.686
14.52	-73.536	8.489	-73.787
14.54	-73.712	8.436	-73.894
14.56	-73.712	8.375	-74.002
14.58	-73.755	8.311	-74.11
14.6	-73.887	8.248	-74.214
14.62	-74.019	8.194	-74.309
14.64	-74.107	8.16	-74.389
14.66	-74.195	8.15	-74.451
14.68	-74.327	8.155	-74.499
14.7	-74.503	8.165	-74.542
14.72	-74.546	8.178	-74.579
14.74	-74.634	8.193	-74.613
14.76	-74.634	8.206	-74.644
14.78	-74.766	8.212	-74.676
14.8	-74.766	8.215	-74.708
14.82	-74.81	8.222	-74.733
14.84	-74.854	8.236	-74.752
14.86	-74.986	8.249	-74.767
14.88	-74.986	8.256	-74.783
14.9	-75.03	8.25	-74.804
14.92	-75.03	8.228	-74.832
14.94	-75.03	8.186	-74.87
14.96	-75.03	8.129	-74.913
14.98	-75.03	8.073	-74.953
15	-75.03	8.038	-74.976
15.02	-75.074	8.031	-74.979
15.04	-75.074	8.046	-74.965
15.06	-75.074	8.064	-74.946
15.08	-75.074	8.076	-74.927
15.1	-75.118	8.08	-74.91
15.12	-75.162	8.084	-74.891
15.14	-75.162	8.092	-74.865
15.16	-75.25	8.102	-74.835
15.18	-75.162	8.114	-74.801
15.2	-75.162	8.118	-74.768
15.22	-75.162	8.113	-74.739
15.24	-75.162	8.096	-74.713
15.26	-75.162	8.067	-74.691
15.28	-75.162	8.03	-74.672
15.3	-74.986	7.988	-74.653
15.32	-74.986	7.935	-74.637
15.34	-74.942	7.869	-74.626
15.36	-74.898	7.787	-74.622
15.38	-74.898	7.698	-74.62
15.4	-74.898	7.617	-74.608
15.42	-74.854	7.556	-74.582
15.44	-74.854	7.508	-74.545
15.46	-74.81	7.461	-74.503
15.48	-74.81	7.409	-74.461
15.5	-74.766	7.357	-74.417
15.52	-74.766	7.305	-74.369
15.54	-74.766	7.254	-74.318
15.56	-74.678	7.205	-74.262
15.58	-74.678	7.158	-74.202
15.6	-74.678	7.116	-74.136
15.62	-74.678	7.076	-74.065
15.64	-74.634	7.039	-73.989
15.66	-74.546	7.008	-73.907
15.68	-74.459	6.978	-73.82
15.7	-74.415	6.938	-73.737
15.72	-74.327	6.875	-73.665
15.74	-74.195	6.791	-73.603
15.76	-74.063	6.7	-73.543
15.78	-74.063	6.618	-73.474
15.8	-74.019	6.556	-73.389
15.82	-73.843	6.507	-73.293
15.84	-73.799	6.455	-73.196
15.86	-73.755	6.397	-73.1
15.88	-73.712	6.338	-73.001
15.9	-73.58	6.286	-72.895
15.92	-73.492	6.24	-72.782
15.94	-73.448	6.196	-72.665
15.96	-73.272	6.15	-72.545
15.98	-73.184	6.099	-72.426
16	-73.096	6.044	-72.307
16.02	-72.921	5.981	-72.189
16.04	-72.833	5.907	-72.076
16.06	-72.745	5.826	-71.964
16.08	-72.701	5.741	-71.851
16.1	-72.569	5.651	-71.739
16.12	-72.437	5.551	-71.629
16.14	-72.393	5.446	-71.52
16.16	-72.173	5.349	-71.403
16.18	-72.129	5.259	-71.279
16.2	-71.998	5.17	-71.151
16.22	-71.778	5.073	-71.025
16.24	-71.646	4.972	-70.899
16.26	-71.602	4.881	-70.763
16.28	-71.426	4.811	-70.612
16.3	-71.382	4.755	-70.448
16.32	-71.207	4.708	-70.277
16.34	-71.207	4.662	-70.102
16.36	-70.987	4.617	-69.923
16.38	-70.811	4.565	-69.745
16.4	-70.635	4.503	-69.572
16.42	-70.504	4.433	-69.4
16.44	-70.284	4.366	-69.224
16.46	-70.152	4.302	-69.043
16.48	-69.888	4.238	-68.859
16.5	-69.8	4.165	-68.678
16.52	-69.581	4.086	-68.497
16.54	-69.317	4.007	-68.314
16.56	-69.097	3.93	-68.127
16.58	-68.965	3.852	-67.938
16.6	-68.834	3.775	-67.745
16.62	-68.614	3.7	-67.548
16.64	-68.394	3.629	-67.346
16.66	-68.306	3.56	-67.141
16.68	-68.087	3.491	-66.932
16.7	-67.999	3.418	-66.723
16.72	-67.735	3.345	-66.512
16.74	-67.647	3.27	-66.299
16.76	-67.339	3.197	-66.081
16.78	-67.208	3.123	-65.862
16.8	-66.9	3.05	-65.64
16.82	-66.636	2.978	-65.414
16.84	-66.461	2.907	-65.185
16.86	-66.241	2.839	-64.952
16.88	-66.065	2.768	-64.718
16.9	-65.713	2.697	-64.481
16.92	-65.582	2.624	-64.243
16.94	-65.274	2.557	-63.998
16.96	-65.098	2.495	-63.748
16.98	-64.835	2.438	-63.492
17	-64.615	2.379	-63.234
17.02	-64.395	2.318	-62.976
17.04	-64.088	2.255	-62.716
17.06	-63.824	2.188	-62.456
17.08	-63.648	2.119	-62.195
17.1	-63.428	2.053	-61.93
17.12	-63.077	1.992	-61.658
17.14	-62.813	1.935	-61.382
17.16	-62.593	1.883	-61.1
17.18	-62.286	1.835	-60.813
17.2	-62.066	1.788	-60.523
17.22	-61.802	1.741	-60.232
17.24	-61.495	1.693	-59.938
17.26	-61.187	1.646	-59.64
17.28	-60.967	1.601	-59.34
17.3	-60.616	1.557	-59.036
17.32	-60.396	1.509	-58.732
17.34	-60.045	1.459	-58.427
17.36	-59.781	1.406	-58.122
17.38	-59.429	1.356	-57.813
17.4	-59.21	1.308	-57.5
17.42	-58.814	1.267	-57.181
17.44	-58.506	1.226	-56.859
17.46	-58.111	1.183	-56.535
17.48	-57.891	1.136	-56.213
17.5	-57.54	1.089	-55.888
17.52	-57.276	1.042	-55.56
17.54	-56.88	0.999	-55.229
17.56	-56.617	0.958	-54.894
17.58	-56.309	0.919	-54.555
17.6	-56.002	0.88	-54.214
17.62	-55.694	0.84	-53.871
17.64	-55.342	0.801	-53.526
17.66	-54.991	0.762	-53.178
17.68	-54.683	0.727	-52.827
17.7	-54.332	0.695	-52.471
17.72	-53.936	0.665	-52.111
17.74	-53.629	0.635	-51.75
17.76	-53.233	0.606	-51.386
17.78	-52.881	0.578	-51.019
17.8	-52.618	0.552	-50.649
17.82	-52.09	0.53	-50.275
17.84	-51.783	0.508	-49.898
17.86	-51.343	0.486	-49.519
17.88	-51.08	0.46	-49.141
17.9	-50.684	0.434	-48.761
17.92	-50.333	0.411	-48.377
17.94	-49.937	0.397	-47.986
17.96	-49.586	0.391	-47.588
17.98	-49.234	0.389	-47.186
18	-48.882	0.382	-46.784
18.02	-48.575	0.369	-46.385
18.04	-48.223	0.351	-45.986
18.06	-47.828	0.333	-45.587
18.08	-47.52	0.314	-45.185
18.1	-47.169	0.295	-44.782
18.12	-46.641	0.278	-44.377
18.14	-46.246	0.259	-43.97
18.16	-45.762	0.242	-43.561
18.18	-45.323	0.225	-43.149
18.2	-44.883	0.21	-42.735
18.22	-44.4	0.196	-42.318
18.24	-43.961	0.182	-41.9
18.26	-43.521	0.168	-41.48
18.28	-43.126	0.15	-41.062
18.3	-42.642	0.128	-40.643
18.32	-42.203	0.106	-40.224
18.34	-41.763	0.086	-39.801
18.36	-41.368	0.073	-39.373
18.38	-41.016	0.064	-38.94
18.4	-40.621	0.058	-38.504
18.42	-40.181	0.056	-38.064
18.44	-39.874	0.058	-37.62
18.46	-39.39	0.066	-37.171
18.48	-38.951	0.072	-36.721
18.5	-38.599	0.075	-36.272
18.52	-38.072	0.076	-35.823
18.54	-37.676	0.078	-35.372
18.56	-37.281	0.086	-34.915
18.58	-36.797	0.101	-34.453
18.6	-36.27	0.12	-33.987
18.62	-35.831	0.14	-33.52
18.64	-35.479	0.157	-33.052
18.66	-34.82	0.17	-32.586
18.68	-34.468	0.172	-32.125
18.7	-33.985	0.161	-31.671
18.72	-33.546	0.134	-31.226
18.74	-33.062	0.086	-30.793
18.76	-32.623	0.007	-30.378
18.78	-32.227	-0.118	-29.99
18.8	-31.744	-0.3	-29.638
18.82	-31.26	-0.549	-29.325
18.84	-30.909	-0.865	-29.054
18.86	-30.469	-1.238	-28.817
18.88	-30.162	-1.658	-28.608
18.9	-29.678	-2.11	-28.418
18.92	-29.415	-2.583	-28.24
18.94	-29.063	-3.06	-28.063
18.96	-28.755	-3.524	-27.878
18.98	-28.624	-3.965	-27.677
19	-28.624	-4.381	-27.46
19.02	-28.624	-4.769	-27.224
19.04	-28.624	-5.123	-26.965
19.06	-28.624	-5.441	-26.683
19.08	-28.624	-5.73	-26.383
19.1	-28.404	-5.994	-26.066
19.12	-28.096	-6.223	-25.725
19.14	-27.789	-6.388	-25.345
19.16	-27.481	-6.481	-24.918
19.18	-27.129	-6.523	-24.458
19.2	-26.734	-6.55	-23.989
19.22	-26.163	-6.586	-23.524
19.24	-25.679	-6.636	-23.068
19.26	-25.284	-6.694	-22.615
19.28	-24.713	-6.755	-22.164
19.3	-24.229	-6.824	-21.716
19.32	-23.746	-6.91	-21.279
19.34	-23.218	-7.028	-20.862
19.36	-22.735	-7.178	-20.463
19.38	-22.339	-7.34	-20.072
19.4	-21.768	-7.494	-19.674
19.42	-21.329	-7.638	-19.27
19.44	-20.845	-7.787	-18.869
19.46	-20.362	-7.942	-18.47
19.48	-19.879	-8.081	-18.062
19.5	-19.571	-8.185	-17.63
19.52	-19.088	-8.254	-17.177
19.54	-18.692	-8.312	-16.716
19.56	-18.384	-8.376	-16.258
19.58	-18.077	-8.452	-15.807
19.6	-17.637	-8.536	-15.361
19.62	-17.286	-8.622	-14.916
19.64	-16.89	-8.7	-14.466
19.66	-16.451	-8.762	-14.005
19.68	-16.099	-8.808	-13.534
19.7	-15.616	-8.85	-13.06
19.72	-15.088	-8.898	-12.589
19.74	-14.781	-8.95	-12.121
19.76	-14.166	-8.983	-11.641
19.78	-13.77	-8.98	-11.137
19.8	-13.155	-8.944	-10.613
19.82	-12.715	-8.907	-10.088
19.84	-12.144	-8.892	-9.577
19.86	-11.529	-8.902	-9.081
19.88	-11.002	-8.923	-8.592
19.9	-10.65	-8.946	-8.104
19.92	-10.167	-8.973	-7.618
19.94	-9.595	-9.009	-7.138
19.96	-8.98	-9.051	-6.662
19.98	-8.541	-9.085	-6.181
20	-8.013	-9.093	-5.683
20.02	-7.53	-9.064	-5.162
20.04	-7.003	-9.003	-4.622
20.06	-6.563	-8.931	-4.074
20.08	-6.036	-8.863	-3.529
20.1	-5.64	-8.804	-2.99
20.12	-5.157	-8.749	-2.453
20.14	-4.498	-8.685	-1.911
20.16	-3.882	-8.603	-1.357
20.18	-3.443	-8.503	-0.793
20.2	-2.96	-8.399	-0.226
20.22	-2.432	-8.31	0.331
20.24	-1.949	-8.245	0.873
20.26	-1.334	-8.203	1.4
20.28	-0.718	-8.178	1.917
20.3	-0.411	-8.171	2.422
20.32	0.248	-8.188	1.406
20.34	0.644	-8.236	1.782
20.36	1.303	-8.312	2.14
20.38	1.743	-8.414	2.482
20.4	2.27	-8.531	2.815
20.42	2.49	-8.644	3.149
20.44	2.797	-8.738	3.495
20.46	2.973	-8.801	3.86
20.48	3.193	-8.826	4.248
20.5	3.325	-8.807	4.664
20.52	3.588	-8.747	5.104
20.54	3.632	-8.662	5.56
20.56	3.808	-8.573	6.019
20.58	3.896	-8.494	6.47
20.6	4.204	-8.438	6.906
20.62	4.555	-8.414	7.322
20.64	4.907	-8.418	7.72
20.66	5.434	-8.432	8.111
20.68	5.961	-8.436	8.508
20.7	6.313	-8.43	8.91
20.72	6.972	-8.439	9.303
20.74	7.455	-8.483	9.673
20.76	8.115	-8.566	10.019
20.78	8.554	-8.674	10.348
20.8	9.081	-8.796	10.667
20.82	9.433	-8.926	10.981
20.84	10.092	-9.059	11.293
20.86	10.444	-9.19	11.605
20.88	10.839	-9.308	11.924
20.9	11.147	-9.392	12.265
20.92	11.542	-9.415	12.642
20.94	11.806	-9.367	13.063
20.96	12.07	-9.267	13.516
20.98	12.421	-9.141	13.984
21	12.421	-9.012	14.454
21.02	12.685	-8.901	14.911
21.04	12.905	-8.819	15.35
21.06	13.256	-8.756	15.775
21.08	13.652	-8.689	16.203
21.1	14.047	-8.605	16.64
21.12	14.399	-8.519	17.077
21.14	15.014	-8.456	17.5
21.16	15.497	-8.421	17.904
21.18	15.981	-8.405	18.295
21.2	16.508	-8.403	18.676
21.22	17.079	-8.427	19.04
21.24	17.607	-8.492	19.378
21.26	18.046	-8.6	19.688
21.28	18.574	-8.74	19.977
21.3	18.881	-8.892	20.257
21.32	19.365	-9.031	20.545
21.34	19.804	-9.132	20.855
21.36	20.2	-9.179	21.197
21.38	20.375	-9.167	21.576
21.4	20.771	-9.097	21.99
21.42	20.991	-8.976	22.435
21.44	21.166	-8.818	22.901
21.46	21.518	-8.634	23.383
21.48	21.738	-8.431	23.876
21.5	22.133	-8.213	24.377
21.52	22.485	-7.986	24.881
21.54	22.661	-7.759	25.385
21.56	23.144	-7.536	25.886
21.58	23.671	-7.315	26.384
21.6	24.199	-7.105	26.874
21.62	24.682	-6.914	27.35
21.64	25.165	-6.75	27.809
21.66	25.825	-6.616	28.247
21.68	26.176	-6.509	28.668
21.7	27.099	-6.431	29.068
21.72	27.407	-6.372	29.456
21.74	27.846	-6.331	29.831
21.76	28.505	-6.297	30.201
21.78	29.033	-6.254	30.574
21.8	29.472	-6.189	30.96
21.82	30.043	-6.1	31.36
21.84	30.439	-5.992	31.77
21.86	30.79	-5.871	32.188
21.88	31.274	-5.736	32.612
21.9	31.625	-5.582	33.047
21.92	31.933	-5.406	33.494
21.94	31.977	-5.21	33.952
21.96	32.329	-5.009	34.412
21.98	32.636	-4.813	34.867
22	33.12	-4.636	35.309
22.02	33.471	-4.479	35.736
22.04	33.823	-4.342	36.15
22.06	34.262	-4.229	36.548
22.08	34.658	-4.147	36.924
22.1	35.229	-4.101	37.276
22.12	35.668	-4.07	37.617
22.14	36.328	-4.033	37.961
22.16	36.547	-3.979	38.313
22.18	37.206	-3.937	38.656
22.2	37.734	-3.928	38.977
22.22	37.954	-3.954	39.275
22.24	38.481	-3.999	39.559
22.26	38.657	-4.033	39.849
22.28	39.14	-4.049	40.148
22.3	39.404	-4.043	40.458
22.32	39.711	-4.024	40.776
22.34	39.887	-4	41.094
22.36	40.107	-3.984	41.407
22.38	40.371	-3.98	41.71
22.4	40.546	-3.981	42.007
22.42	40.766	-3.978	42.306
22.44	41.205	-3.966	42.609
22.46	41.513	-3.947	42.914
22.48	41.689	-3.929	43.217
22.5	42.084	-3.917	43.514
22.52	42.524	-3.908	43.808
22.54	42.875	-3.9	44.098
22.56	43.139	-3.894	44.386
22.58	43.227	-3.89	44.671
22.6	43.622	-3.892	44.95
22.62	43.974	-3.899	45.225
22.64	44.326	-3.913	45.493
22.66	44.589	-3.933	45.755
22.68	44.809	-3.952	46.016
22.7	45.161	-3.964	46.28
22.72	45.38	-3.967	46.547
22.74	45.776	-3.967	46.814
22.76	46.039	-3.967	47.08
22.78	46.391	-3.966	47.343
22.8	46.655	-3.963	47.606
22.82	46.918	-3.959	47.869
22.84	47.094	-3.956	48.127
22.86	47.226	-3.959	48.381
22.88	47.709	-3.969	48.628
22.9	47.841	-3.984	48.87
22.92	47.885	-4.008	49.104
22.94	48.105	-4.043	49.33
22.96	48.5	-4.083	49.55
22.98	48.676	-4.115	49.773
23	48.896	-4.139	49.999
23.02	49.247	-4.159	50.226
23.04	49.511	-4.18	50.449
23.06	49.907	-4.205	50.669
23.08	49.951	-4.227	50.888
23.1	50.39	-4.247	51.106
23.12	50.39	-4.263	51.324
23.14	50.654	-4.284	51.538
23.16	50.961	-4.31	51.745
23.18	51.005	-4.335	51.952
23.2	51.313	-4.355	52.159
23.22	51.621	-4.369	52.368
23.24	51.796	-4.379	52.578
23.26	52.104	-4.395	52.781
23.28	52.28	-4.419	52.977
23.3	52.455	-4.451	53.167
23.32	52.499	-4.483	53.353
23.34	52.807	-4.513	53.539
23.36	52.939	-4.537	53.727
23.38	53.203	-4.561	53.911
23.4	53.554	-4.593	54.089
23.42	53.686	-4.629	54.263
23.44	53.818	-4.663	54.435
23.46	53.906	-4.688	54.61
23.48	54.081	-4.7	54.791
23.5	54.301	-4.702	54.976
23.52	54.345	-4.699	55.163
23.54	54.653	-4.697	55.346
23.56	54.697	-4.689	55.531
23.58	54.872	-4.675	55.717
23.6	55.18	-4.657	55.903
23.62	55.18	-4.641	56.086
23.64	55.532	-4.642	56.256
23.66	55.707	-4.656	56.415
23.68	56.015	-4.675	56.569
23.7	56.059	-4.682	56.728
23.72	56.323	-4.678	56.891
23.74	56.367	-4.666	57.058
23.76	56.674	-4.657	57.22
23.78	56.85	-4.648	57.379
23.8	56.85	-4.64	57.535
23.82	57.114	-4.638	57.686
23.84	57.377	-4.643	57.829
23.86	57.421	-4.653	57.968
23.88	57.509	-4.667	58.101
23.9	57.861	-4.682	58.231
23.92	57.861	-4.689	58.364
23.94	57.905	-4.688	58.499
23.96	58.124	-4.679	58.637
23.98	58.344	-4.665	58.776
24	58.476	-4.655	58.91
24.02	58.476	-4.654	59.035
24.04	58.784	-4.67	59.147
24.06	58.871	-4.694	59.253
24.08	58.915	-4.717	59.356
24.1	59.135	-4.734	59.46
24.12	59.267	-4.737	59.571
24.14	59.311	-4.726	59.688
24.16	59.487	-4.711	59.806
24.18	59.706	-4.697	59.919
24.2	59.706	-4.688	60.028
24.22	59.75	-4.684	60.131
24.24	59.926	-4.684	60.229
24.26	59.97	-4.687	60.322
24.28	60.102	-4.699	60.408
24.3	60.146	-4.717	60.487
24.32	60.234	-4.738	60.561
24.34	60.454	-4.759	60.634
24.36	60.497	-4.776	60.706
24.38	60.585	-4.799	60.772
24.4	60.673	-4.835	60.827
24.42	60.717	-4.886	60.87
24.44	60.937	-4.95	60.903
24.46	60.937	-5.014	60.933
24.48	60.981	-5.079	60.96
24.5	60.981	-5.146	60.984
24.52	60.981	-5.22	61
24.54	61.069	-5.303	61.008
24.56	61.113	-5.391	61.011
24.58	61.113	-5.478	61.011
24.6	61.157	-5.56	61.012
24.62	61.201	-5.635	61.015
24.64	61.201	-5.699	61.023
24.66	61.201	-5.746	61.039
24.68	61.245	-5.774	61.063
24.7	61.245	-5.787	61.095
24.72	61.245	-5.798	61.125
24.74	61.288	-5.82	61.146
24.76	61.288	-5.859	61.154
24.78	61.288	-5.913	61.149
24.8	61.288	-5.973	61.138
24.82	61.288	-6.029	61.128
24.84	61.288	-6.07	61.124
24.86	61.201	-6.092	61.13
24.88	61.201	-6.1	61.141
24.9	61.201	-6.105	61.152
24.92	61.201	-6.115	61.158
24.94	61.245	-6.135	61.154
24.96	61.245	-6.163	61.143
24.98	61.332	-6.193	61.128
25	61.288	-6.224	61.11
25.02	61.464	-6.265	61.083
25.04	61.464	-6.325	61.042
25.06	61.288	-6.409	60.983
25.08	61.288	-6.515	60.908
25.1	61.201	-6.625	60.827
25.12	61.157	-6.723	60.752
25.14	61.157	-6.799	60.688
25.16	61.157	-6.862	60.629
25.18	61.025	-6.926	60.567
25.2	60.937	-7.006	60.493
25.22	60.717	-7.091	60.413
25.24	60.673	-7.166	60.337
25.26	60.673	-7.223	60.269
25.28	60.673	-7.268	60.206
25.3	60.629	-7.316	60.139
25.32	60.585	-7.371	60.065
25.34	60.541	-7.431	59.985
25.36	60.541	-7.484	59.908
25.38	60.541	-7.518	59.838
25.4	60.278	-7.529	59.782
25.42	60.278	-7.528	59.73
25.44	60.234	-7.52	59.68
25.46	60.19	-7.513	59.627
25.48	60.146	-7.507	59.57
25.5	59.882	-7.505	59.509
25.52	59.838	-7.511	59.44
25.54	59.794	-7.52	59.367
25.56	59.706	-7.523	59.295
25.58	59.706	-7.518	59.225
25.6	59.575	-7.515	59.151
25.62	59.575	-7.528	59.066
25.64	59.575	-7.554	58.969
25.66	59.355	-7.576	58.873
25.68	59.355	-7.582	58.784
25.7	59.223	-7.568	58.705
25.72	59.223	-7.546	58.628
25.74	59.135	-7.522	58.55
25.76	59.047	-7.498	58.47
25.78	58.871	-7.466	58.392
25.8	58.871	-7.425	58.317
25.82	58.608	-7.372	58.247
25.84	58.608	-7.314	58.179
25.86	58.608	-7.244	58.115
25.88	58.52	-7.157	58.059
25.9	58.476	-7.059	58.007
25.92	58.432	-6.961	57.953
25.94	58.432	-6.874	57.89
25.96	58.388	-6.795	57.819
25.98	58.3	-6.715	57.747
26	58.168	-6.633	57.673
26.02	58.124	-6.553	57.596
26.04	58.08	-6.477	57.513
26.06	58.08	-6.408	57.424
26.08	57.949	-6.344	57.329
26.1	57.861	-6.29	57.226
26.12	57.773	-6.244	57.115
26.14	57.729	-6.205	56.998
26.16	57.553	-6.168	56.876
26.18	57.421	-6.133	56.751
26.2	57.421	-6.097	56.625
26.22	57.289	-6.054	56.5
26.24	57.289	-6.01	56.374
26.26	57.026	-5.967	56.244
26.28	57.026	-5.935	56.105
26.3	56.806	-5.909	55.961
26.32	56.806	-5.883	55.814
26.34	56.762	-5.852	55.667
26.36	56.323	-5.81	55.526
26.38	56.279	-5.764	55.384
26.4	56.059	-5.711	55.244
26.42	55.795	-5.651	55.107
26.44	55.62	-5.585	54.97
26.46	55.62	-5.516	54.834
26.48	55.356	-5.442	54.698
26.5	55.312	-5.378	54.554
26.52	55.004	-5.324	54.402
26.54	55.004	-5.284	54.238
26.56	54.96	-5.249	54.068
26.58	54.916	-5.215	53.896
26.6	54.697	-5.182	53.721
26.62	54.565	-5.157	53.539
26.64	54.521	-5.138	53.351
26.66	54.345	-5.112	53.164
26.68	54.257	-5.077	52.982
26.7	53.95	-5.032	52.803
26.72	53.95	-4.99	52.621
26.74	53.598	-4.948	52.436
26.76	53.29	-4.908	52.247
26.78	53.203	-4.871	52.055
26.8	52.807	-4.831	51.862
26.82	52.587	-4.792	51.666
26.84	52.455	-4.752	51.469
26.86	52.104	-4.71	51.271
26.88	52.104	-4.674	51.068
26.9	51.884	-4.639	50.861
26.92	51.84	-4.604	50.652
26.94	51.577	-4.564	50.444
26.96	51.401	-4.522	50.236
26.98	51.313	-4.483	50.023
27	51.005	-4.442	49.81
27.02	51.005	-4.4	49.595
27.04	50.478	-4.347	49.385
27.06	50.434	-4.294	49.173
27.08	50.302	-4.245	48.956
27.1	50.082	-4.202	48.734
27.12	49.819	-4.159	48.51
27.14	49.379	-4.109	48.287
27.16	49.247	-4.059	48.063
27.18	49.116	-4.01	47.836
27.2	48.72	-3.967	47.604
27.22	48.5	-3.93	47.366
27.24	48.193	-3.898	47.123
27.26	48.061	-3.868	46.876
27.28	47.841	-3.838	46.628
27.3	47.753	-3.805	46.379
27.32	47.358	-3.767	46.132
27.34	47.226	-3.73	45.882
27.36	47.094	-3.694	45.63
27.38	46.874	-3.657	45.376
27.4	46.567	-3.616	45.123
27.42	46.303	-3.572	44.87
27.44	45.996	-3.523	44.618
27.46	45.776	-3.471	44.367
27.48	45.644	-3.412	44.118
27.5	45.073	-3.344	43.872
27.52	44.941	-3.278	43.624
27.54	44.677	-3.213	43.373
27.56	44.501	-3.152	43.118
27.58	44.15	-3.092	42.86
27.6	43.886	-3.038	42.597
27.62	43.622	-2.99	42.328
27.64	43.579	-2.946	42.055
27.66	43.227	-2.899	41.783
27.68	42.919	-2.847	41.511
27.7	42.7	-2.794	41.239
27.72	42.48	-2.742	40.964
27.74	42.172	-2.694	40.686
27.76	41.953	-2.647	40.405
27.78	41.601	-2.598	40.123
27.8	41.513	-2.55	39.839
27.82	41.162	-2.502	39.553
27.84	40.81	-2.458	39.264
27.86	40.766	-2.42	38.969
27.88	40.107	-2.38	38.673
27.9	39.931	-2.347	38.372
27.92	39.623	-2.317	38.067
27.94	39.272	-2.291	37.759
27.96	38.964	-2.265	37.448
27.98	38.92	-2.237	37.137
28	38.481	-2.202	36.83
28.02	38.085	-2.165	36.522
28.04	37.91	-2.128	36.212
28.06	37.558	-2.088	35.903
28.08	37.25	-2.046	35.594
28.1	36.987	-2.005	35.283
28.12	36.591	-1.965	34.969
28.14	36.415	-1.933	34.649
28.16	35.932	-1.903	34.326
28.18	35.624	-1.878	33.999
28.2	35.273	-1.859	33.667
28.22	35.009	-1.846	33.329
28.24	34.658	-1.838	32.988
28.26	34.394	-1.831	32.644
28.28	33.954	-1.823	32.299
28.3	33.823	-1.818	31.952
28.32	33.339	-1.813	31.602
28.34	33.12	-1.81	31.251
28.36	32.768	-1.804	30.9
28.38	32.372	-1.792	30.551
28.4	31.977	-1.777	30.203
28.42	31.625	-1.763	29.854
28.44	31.318	-1.752	29.5
28.46	31.054	-1.745	29.144
28.48	30.615	-1.739	28.786
28.5	30.395	-1.734	28.425
28.52	29.955	-1.726	28.066
28.54	29.604	-1.713	27.708
28.56	29.34	-1.696	27.353
28.58	28.813	-1.672	26.999
28.6	28.505	-1.647	26.646
28.62	28.198	-1.621	26.293
28.64	27.802	-1.596	25.937
28.66	27.231	-1.573	25.579
28.68	26.923	-1.557	25.216
28.7	26.66	-1.545	24.849
28.72	26.176	-1.532	24.482
28.74	25.912	-1.518	24.114
28.76	25.649	-1.502	23.747
28.78	25.253	-1.483	23.381
28.8	24.946	-1.463	23.014
28.82	24.638	-1.444	22.646
28.84	24.199	-1.428	22.275
28.86	23.979	-1.415	21.9
28.88	23.496	-1.402	21.526
28.9	23.144	-1.385	21.152
28.92	22.836	-1.368	20.779
28.94	22.353	-1.351	20.403
28.96	22.001	-1.338	20.025
28.98	21.518	-1.326	19.645
29	21.166	-1.313	19.265
29.02	20.815	-1.298	18.886
29.04	20.331	-1.284	18.505
29.06	19.98	-1.271	18.123
29.08	19.628	-1.257	17.741
29.1	19.321	-1.238	17.361
29.12	18.881	-1.215	16.983
29.14	18.486	-1.193	16.603
29.16	18.134	-1.176	16.22
29.18	17.827	-1.161	15.835
29.2	17.475	-1.143	15.451
29.22	16.904	-1.122	15.068
29.24	16.64	-1.102	14.684
29.26	16.332	-1.085	14.297
29.28	15.849	-1.068	13.91
29.3	15.366	-1.052	13.522
29.32	15.146	-1.037	13.132
29.34	14.575	-1.024	12.741
29.36	14.091	-1.014	12.347
29.38	13.959	-1.009	11.95
29.4	13.564	-1.004	11.552
29.42	13.08	-0.998	11.154
29.44	12.861	-0.991	10.757
29.46	12.465	-0.98	10.362
29.48	11.938	-0.967	9.967
29.5	11.63	-0.953	9.573
29.52	11.279	-0.938	9.179
29.54	10.883	-0.926	8.782
29.56	10.444	-0.917	8.383
29.58	9.872	-0.907	7.985
29.6	9.653	-0.891	7.59
29.62	9.213	-0.864	7.201
29.64	8.73	-0.829	6.818
29.66	8.422	-0.79	6.436
29.68	7.895	-0.753	6.053
29.7	7.587	-0.72	5.667
29.72	7.324	-0.685	5.282
29.74	6.928	-0.632	4.909
29.76	6.621	-0.536	4.561
29.78	6.137	-0.373	4.256
29.8	6.093	-0.131	3.999
29.82	5.873	0.182	3.788
29.84	5.566	0.552	3.611
29.86	5.082	0.966	3.462
29.88	4.775	1.419	3.337
29.9	4.467	1.899	3.229
29.92	3.984	2.381	3.121
29.94	3.72	2.835	2.997
29.96	3.369	3.246	2.845
29.98	3.237	3.614	2.667
30	3.149	3.947	2.467
30.02	2.841	4.242	2.243
30.04	2.665	4.492	1.99
30.06	2.621	4.691	1.707
30.08	2.578	4.849	1.397
30.1	2.358	4.98	1.071
30.12	2.27	5.088	0.73
30.14	2.094	5.175	0.376
30.16	1.962	5.246	0.013
30.18	1.743	5.319	-0.35
30.2	1.567	5.406	-0.703
30.22	1.259	5.51	-1.045
30.24	0.908	5.623	-1.382
30.26	0.556	5.738	-1.717
30.28	0.248	5.857	-2.049
30.3	-0.015	5.986	-3.788
30.32	-0.323	6.123	-4.202
30.34	-0.894	6.262	-4.615
30.36	-1.29	6.392	-5.033
30.38	-1.861	6.515	-5.456
30.4	-2.388	6.637	-5.879
30.42	-2.828	6.767	-6.295
30.44	-3.179	6.909	-6.705
30.46	-3.926	7.059	-7.109
30.48	-4.805	7.219	-7.506
30.5	-5.333	7.387	-7.898
30.52	-6.036	7.559	-8.287
30.54	-6.739	7.726	-8.678
30.56	-7.398	7.874	-9.081
30.58	-7.969	7.991	-9.502
30.6	-8.409	8.078	-9.942
30.62	-8.892	8.142	-10.395
30.64	-9.376	8.184	-10.862
30.66	-9.683	8.201	-11.343
30.68	-10.035	8.202	-11.834
30.7	-10.386	8.204	-12.324
30.72	-10.694	8.22	-12.804
30.74	-11.046	8.243	-13.279
30.76	-11.265	8.254	-13.761
30.78	-11.705	8.248	-14.253
30.8	-12.144	8.238	-14.747
30.82	-12.54	8.239	-15.232
30.84	-12.935	8.259	-15.705
30.86	-13.506	8.297	-16.167
30.88	-13.99	8.344	-16.621
30.9	-14.737	8.391	-17.075
30.92	-15.088	8.438	-17.528
30.94	-15.572	8.493	-17.975
30.96	-16.099	8.562	-18.412
30.98	-16.627	8.643	-18.841
31	-17.198	8.725	-19.268
31.02	-17.681	8.799	-19.7
31.04	-18.34	8.857	-20.14
31.06	-18.736	8.895	-20.592
31.08	-19.175	8.909	-21.057
31.1	-19.615	8.902	-21.536
31.12	-20.098	8.877	-22.024
31.14	-20.538	8.843	-22.516
31.16	-20.889	8.818	-23.001
31.18	-21.285	8.812	-23.475
31.2	-21.724	8.815	-23.941
31.22	-22.12	8.806	-24.413
31.24	-22.559	8.772	-24.9
31.26	-22.955	8.723	-25.395
31.28	-23.438	8.669	-25.892
31.3	-23.921	8.622	-26.383
31.32	-24.405	8.59	-26.864
31.34	-24.888	8.587	-27.325
31.36	-25.372	8.615	-27.765
31.38	-25.943	8.663	-28.192
31.4	-26.47	8.718	-28.614
31.42	-26.866	8.769	-29.036
31.44	-27.481	8.805	-29.466
31.46	-27.964	8.816	-29.911
31.48	-28.536	8.794	-30.375
31.5	-28.931	8.753	-30.849
31.52	-29.503	8.719	-31.317
31.54	-29.81	8.719	-31.763
31.56	-30.294	8.752	-32.186
31.58	-30.777	8.794	-32.603
31.6	-31.172	8.804	-33.038
31.62	-31.568	8.758	-33.506
31.64	-32.007	8.669	-34
31.66	-32.403	8.569	-34.499
31.68	-32.798	8.486	-34.986
31.7	-33.194	8.429	-35.455
31.72	-33.633	8.4	-35.905
31.74	-34.117	8.396	-36.338
31.76	-34.468	8.413	-36.756
31.78	-35.04	8.437	-37.168
31.8	-35.523	8.464	-37.576
31.82	-36.006	8.487	-37.985
31.84	-36.578	8.493	-38.404
31.86	-37.061	8.455	-38.848
31.88	-37.588	8.358	-39.326
31.9	-37.984	8.228	-39.824
31.92	-38.423	8.114	-40.31
31.94	-38.907	8.049	-40.764
31.96	-39.258	8.028	-41.188
31.98	-39.698	8.02	-41.603
32	-40.093	8.002	-42.021
32.02	-40.621	7.961	-42.453
32.04	-41.016	7.886	-42.903
32.06	-41.368	7.772	-43.377
32.08	-41.851	7.632	-43.864
32.1	-42.247	7.505	-44.342
32.12	-42.686	7.416	-44.794
32.14	-43.126	7.364	-45.221
32.16	-43.565	7.331	-45.633
32.18	-44.048	7.308	-46.038
32.2	-44.488	7.297	-46.433
32.22	-44.927	7.296	-46.82
32.24	-45.411	7.3	-47.202
32.26	-45.894	7.308	-47.579
32.28	-46.334	7.326	-47.948
32.3	-46.773	7.35	-48.311
32.32	-47.256	7.364	-48.679
32.34	-47.608	7.359	-49.056
32.36	-48.047	7.334	-49.443
32.38	-48.487	7.298	-49.835
32.4	-48.838	7.255	-50.229
32.42	-49.146	7.214	-50.62
32.44	-49.41	7.191	-50.998
32.46	-49.761	7.198	-51.354
32.48	-50.201	7.227	-51.695
32.5	-50.508	7.255	-52.034
32.52	-50.86	7.26	-52.386
32.54	-51.212	7.238	-52.751
32.56	-51.563	7.2	-53.125
32.58	-52.046	7.152	-53.502
32.6	-52.266	7.101	-53.879
32.62	-52.662	7.039	-54.261
32.64	-53.013	6.962	-54.65
32.66	-53.365	6.873	-55.044
32.68	-53.716	6.784	-55.435
32.7	-54.112	6.716	-55.812
32.72	-54.463	6.682	-56.164
32.74	-54.903	6.684	-56.492
32.76	-55.254	6.714	-56.799
32.78	-55.782	6.755	-57.097
32.8	-56.046	6.797	-57.393
32.82	-56.441	6.833	-57.689
32.84	-56.837	6.871	-57.982
32.86	-57.232	6.912	-58.271
32.88	-57.54	6.946	-58.562
32.9	-57.847	6.956	-58.865
32.92	-58.111	6.932	-59.187
32.94	-58.419	6.873	-59.528
32.96	-58.726	6.799	-59.876
32.98	-58.946	6.74	-60.212
33	-59.21	6.713	-60.526
33.02	-59.473	6.715	-60.819
33.04	-59.781	6.72	-61.107
33.06	-60.176	6.704	-61.406
33.08	-60.396	6.669	-61.714
33.1	-60.704	6.633	-62.021
33.12	-61.143	6.612	-62.315
33.14	-61.363	6.61	-62.595
33.16	-61.714	6.614	-62.868
33.18	-62.022	6.617	-63.14
33.2	-62.33	6.621	-63.408
33.22	-62.637	6.633	-63.669
33.24	-62.945	6.651	-63.923
33.26	-63.253	6.662	-64.178
33.28	-63.56	6.659	-64.44
33.3	-63.78	6.652	-64.702
33.32	-64.088	6.657	-64.953
33.34	-64.307	6.685	-65.188
33.36	-64.527	6.726	-65.411
33.38	-64.747	6.76	-65.636
33.4	-64.966	6.771	-65.873
33.42	-65.23	6.74	-66.133
33.44	-65.538	6.666	-66.417
33.46	-65.757	6.567	-66.714
33.48	-65.933	6.481	-67
33.5	-66.197	6.436	-67.258
33.52	-66.417	6.44	-67.482
33.54	-66.68	6.474	-67.685
33.56	-66.988	6.515	-67.881
33.58	-67.208	6.548	-68.078
33.6	-67.427	6.571	-68.279
33.62	-67.691	6.585	-68.483
33.64	-67.999	6.594	-68.687
33.66	-68.262	6.6	-68.89
33.68	-68.526	6.603	-69.092
33.7	-68.614	6.612	-69.288
33.72	-68.921	6.634	-69.472
33.74	-69.053	6.673	-69.643
33.76	-69.273	6.714	-69.81
33.78	-69.449	6.742	-69.982
33.8	-69.625	6.754	-70.161
33.82	-69.713	6.759	-70.341
33.84	-69.976	6.766	-70.518
33.86	-70.196	6.767	-70.695
33.88	-70.284	6.743	-70.884
33.9	-70.46	6.683	-71.093
33.92	-70.635	6.603	-71.313
33.94	-70.811	6.53	-71.524
33.96	-70.987	6.489	-71.712
33.98	-71.163	6.487	-71.873
34	-71.47	6.509	-72.016
34.02	-71.602	6.535	-72.154
34.04	-71.778	6.538	-72.303
34.06	-71.866	6.51	-72.468
34.08	-72.086	6.459	-72.645
34.1	-72.349	6.396	-72.826
34.12	-72.481	6.325	-73.009
34.14	-72.701	6.243	-73.196
34.16	-72.789	6.163	-73.379
34.18	-72.921	6.098	-73.549
34.2	-73.052	6.06	-73.699
34.22	-73.228	6.047	-73.83
34.24	-73.404	6.056	-73.945
34.26	-73.58	6.082	-74.047
34.28	-73.712	6.118	-74.138
34.3	-73.931	6.154	-74.227
34.32	-74.063	6.184	-74.316
34.34	-74.327	6.197	-74.413
34.36	-74.415	6.19	-74.519
34.38	-74.459	6.163	-74.635
34.4	-74.678	6.127	-74.753
34.42	-74.678	6.106	-74.86
34.44	-74.766	6.104	-74.95
34.46	-74.854	6.117	-75.029
34.48	-74.854	6.136	-75.1
34.5	-74.942	6.155	-75.168
34.52	-74.986	6.172	-75.235
34.54	-75.25	6.177	-75.306
34.56	-75.25	6.169	-75.381
34.58	-75.338	6.147	-75.463
34.6	-75.381	6.122	-75.543
34.62	-75.513	6.098	-75.619
34.64	-75.645	6.076	-75.691
34.66	-75.689	6.057	-75.759
34.68	-75.777	6.036	-75.824
34.7	-75.821	6.012	-75.887
34.72	-75.865	5.986	-75.949
34.74	-75.953	5.964	-76.006
34.76	-75.953	5.955	-76.051
34.78	-76.041	5.956	-76.086
34.8	-76.172	5.958	-76.118
34.82	-76.172	5.956	-76.15
34.84	-76.216	5.947	-76.182
34.86	-76.26	5.934	-76.214
34.88	-76.304	5.914	-76.247
34.9	-76.304	5.888	-76.281
34.92	-76.304	5.858	-76.314
34.94	-76.48	5.825	-76.345
34.96	-76.524	5.793	-76.373
34.98	-76.524	5.761	-76.398
35	-76.568	5.732	-76.418
35.02	-76.612	5.709	-76.43
35.04	-76.656	5.693	-76.436
35.06	-76.656	5.678	-76.437
35.08	-76.656	5.662	-76.436
35.1	-76.656	5.641	-76.435
35.12	-76.656	5.61	-76.437
35.14	-76.656	5.567	-76.443
35.16	-76.656	5.519	-76.45
35.18	-76.656	5.476	-76.45
35.2	-76.656	5.444	-76.44
35.22	-76.656	5.417	-76.423
35.24	-76.656	5.384	-76.408
35.26	-76.656	5.335	-76.399
35.28	-76.656	5.278	-76.392
35.3	-76.656	5.225	-76.379
35.32	-76.656	5.183	-76.356
35.34	-76.656	5.149	-76.326
35.36	-76.656	5.113	-76.293
35.38	-76.656	5.071	-76.261
35.4	-76.656	5.028	-76.227
35.42	-76.612	4.984	-76.189
35.44	-76.568	4.94	-76.149
35.46	-76.524	4.895	-76.107
35.48	-76.524	4.849	-76.062
35.5	-76.524	4.801	-76.015
35.52	-76.436	4.746	-75.969
35.54	-76.436	4.679	-75.927
35.56	-76.304	4.608	-75.885
35.58	-76.304	4.541	-75.837
35.6	-76.304	4.488	-75.778
35.62	-76.172	4.452	-75.705
35.64	-76.041	4.426	-75.622
35.66	-76.041	4.402	-75.535
35.68	-75.997	4.375	-75.447
35.7	-75.953	4.344	-75.358
35.72	-75.865	4.311	-75.268
35.74	-75.821	4.275	-75.176
35.76	-75.733	4.238	-75.082
35.78	-75.557	4.199	-74.986
35.8	-75.557	4.16	-74.887
35.82	-75.381	4.124	-74.783
35.84	-75.294	4.088	-74.676
35.86	-75.294	4.051	-74.566
35.88	-75.206	4.016	-74.452
35.9	-75.074	3.982	-74.335
35.92	-75.074	3.947	-74.215
35.94	-74.898	3.911	-74.093
35.96	-74.81	3.872	-73.969
35.98	-74.678	3.831	-73.844
36	-74.546	3.789	-73.717
36.02	-74.503	3.743	-73.589
36.04	-74.283	3.695	-73.459
36.06	-74.063	3.646	-73.326
36.08	-74.019	3.598	-73.191
36.1	-73.843	3.556	-73.048
36.12	-73.712	3.519	-72.899
36.14	-73.58	3.483	-72.747
36.16	-73.536	3.444	-72.594
36.18	-73.36	3.399	-72.441
36.2	-73.228	3.345	-72.292
36.22	-73.14	3.282	-72.144
36.24	-72.964	3.216	-71.996
36.26	-72.877	3.149	-71.846
36.28	-72.701	3.082	-71.692
36.3	-72.525	3.016	-71.536
36.32	-72.349	2.949	-71.376
36.34	-72.129	2.884	-71.213
36.36	-71.998	2.821	-71.045
36.38	-71.822	2.762	-70.872
36.4	-71.734	2.703	-70.697
36.42	-71.514	2.643	-70.519
36.44	-71.382	2.58	-70.34
36.46	-71.163	2.52	-70.156
36.48	-71.031	2.466	-69.966
36.5	-70.855	2.422	-69.767
36.52	-70.547	2.384	-69.561
36.54	-70.504	2.347	-69.351
36.56	-70.152	2.317	-69.135
36.58	-70.108	2.288	-68.915
36.6	-69.932	2.261	-68.692
36.62	-69.713	2.23	-68.467
36.64	-69.493	2.192	-68.245
36.66	-69.317	2.15	-68.022
36.68	-69.009	2.107	-67.797
36.7	-68.79	2.065	-67.568
36.72	-68.614	2.023	-67.338
36.74	-68.394	1.978	-67.106
36.76	-68.306	1.929	-66.874
36.78	-67.955	1.883	-66.637
36.8	-67.691	1.841	-66.396
36.82	-67.515	1.803	-66.149
36.84	-67.252	1.768	-65.898
36.86	-66.9	1.73	-65.645
36.88	-66.724	1.687	-65.394
36.9	-66.592	1.639	-65.142
36.92	-66.285	1.591	-64.888
36.94	-66.109	1.544	-64.631
36.96	-65.801	1.499	-64.37
36.98	-65.45	1.454	-64.107
37	-65.318	1.407	-63.842
37.02	-65.01	1.362	-63.574
37.04	-64.703	1.32	-63.3
37.06	-64.439	1.283	-63.022
37.08	-64.219	1.246	-62.74
37.1	-63.868	1.209	-62.457
37.12	-63.604	1.169	-62.172
37.14	-63.34	1.131	-61.884
37.16	-63.121	1.096	-61.592
37.18	-62.681	1.066	-61.294
37.2	-62.549	1.034	-60.995
37.22	-62.242	1.003	-60.692
37.24	-62.022	0.974	-60.387
37.26	-61.758	0.947	-60.077
37.28	-61.451	0.922	-59.764
37.3	-61.143	0.895	-59.449
37.32	-60.879	0.867	-59.134
37.34	-60.528	0.838	-58.815
37.36	-60.176	0.811	-58.494
37.38	-59.825	0.785	-58.17
37.4	-59.561	0.76	-57.842
37.42	-59.21	0.74	-57.51
37.44	-58.77	0.724	-57.173
37.46	-58.463	0.707	-56.833
37.48	-58.155	0.689	-56.492
37.5	-57.847	0.669	-56.15
37.52	-57.54	0.644	-55.81
37.54	-57.188	0.615	-55.469
37.56	-56.837	0.585	-55.127
37.58	-56.573	0.556	-54.782
37.6	-56.265	0.531	-54.432
37.62	-55.914	0.509	-54.078
37.64	-55.606	0.486	-53.723
37.66	-55.167	0.461	-53.367
37.68	-54.903	0.431	-53.012
37.7	-54.463	0.4	-52.655
37.72	-54.156	0.371	-52.295
37.74	-53.98	0.342	-51.933
37.76	-53.585	0.317	-51.566
37.78	-53.365	0.289	-51.2
37.8	-52.969	0.259	-50.832
37.82	-52.574	0.228	-50.463
37.84	-52.266	0.194	-50.094
37.86	-51.739	0.162	-49.722
37.88	-51.343	0.13	-49.347
37.9	-50.948	0.1	-48.97
37.92	-50.596	0.069	-48.591
37.94	-50.113	0.041	-48.209
37.96	-49.673	0.015	-47.823
37.98	-49.322	-0.009	-47.434
38	-48.882	-0.029	-47.041
38.02	-48.399	-0.05	-46.647
38.04	-48.047	-0.078	-46.255
38.06	-47.784	-0.111	-45.864
38.08	-47.344	-0.143	-45.471
38.1	-46.993	-0.173	-45.075
38.12	-46.685	-0.2	-44.675
38.14	-46.334	-0.225	-44.272
38.16	-45.894	-0.248	-43.866
38.18	-45.543	-0.27	-43.458
38.2	-45.191	-0.289	-43.046
38.22	-44.796	-0.305	-42.632
38.24	-44.4	-0.324	-42.216
38.26	-43.917	-0.346	-41.802
38.28	-43.477	-0.375	-41.389
38.3	-43.082	-0.408	-40.978
38.32	-42.686	-0.444	-40.568
38.34	-42.247	-0.483	-40.157
38.36	-41.807	-0.521	-39.744
38.38	-41.368	-0.556	-39.327
38.4	-40.928	-0.587	-38.907
38.42	-40.533	-0.621	-38.487
38.44	-40.093	-0.665	-38.072
38.46	-39.786	-0.723	-37.664
38.48	-39.258	-0.792	-37.261
38.5	-38.951	-0.87	-36.863
38.52	-38.599	-0.955	-36.468
38.54	-38.16	-1.044	-36.073
38.56	-37.676	-1.131	-35.676
38.58	-37.281	-1.212	-35.274
38.6	-36.885	-1.284	-34.865
38.62	-36.49	-1.347	-34.449
38.64	-36.094	-1.409	-34.031
38.66	-35.655	-1.48	-33.617
38.68	-35.303	-1.565	-33.21
38.7	-34.908	-1.661	-32.81
38.72	-34.512	-1.765	-32.413
38.74	-34.161	-1.877	-32.02
38.76	-33.589	-1.999	-31.632
38.78	-33.326	-2.144	-31.257
38.8	-32.886	-2.312	-30.895
38.82	-32.491	-2.506	-30.548
38.84	-32.095	-2.722	-30.214
38.86	-31.656	-2.953	-29.889
38.88	-31.304	-3.192	-29.566
38.9	-30.997	-3.427	-29.241
38.92	-30.601	-3.654	-28.909
38.94	-30.206	-3.876	-28.573
38.96	-29.942	-4.102	-28.239
38.98	-29.59	-4.339	-27.911
39	-29.283	-4.587	-27.588
39.02	-29.019	-4.837	-27.266
39.04	-28.843	-5.072	-26.934
39.06	-28.799	-5.279	-26.582
39.08	-28.712	-5.453	-26.21
39.1	-28.404	-5.612	-25.827
39.12	-28.228	-5.778	-25.448
39.14	-27.877	-5.951	-25.071
39.16	-27.481	-6.111	-24.687
39.18	-27.042	-6.247	-24.286
39.2	-26.47	-6.365	-23.873
39.22	-26.075	-6.484	-23.461
39.24	-25.372	-6.608	-23.05
39.26	-24.888	-6.73	-22.637
39.28	-24.361	-6.832	-22.211
39.3	-23.878	-6.909	-21.77
39.32	-23.438	-6.973	-21.319
39.34	-22.911	-7.034	-20.865
39.36	-22.339	-7.096	-20.412
39.38	-21.856	-7.152	-19.954
39.4	-21.636	-7.198	-19.489
39.42	-21.109	-7.229	-19.015
39.44	-20.67	-7.246	-18.531
39.46	-20.318	-7.247	-18.036
39.48	-19.835	-7.23	-17.53
39.5	-19.395	-7.195	-17.012
39.52	-19.088	-7.144	-16.483
39.54	-18.692	-7.086	-15.95
39.56	-18.165	-7.03	-15.417
39.58	-17.637	-6.982	-14.889
39.6	-17.242	-6.946	-14.368
39.62	-16.671	-6.928	-13.858
39.64	-16.187	-6.93	-13.36
39.66	-15.66	-6.939	-12.866
39.68	-15.088	-6.947	-12.371
39.7	-14.561	-6.96	-11.878
39.72	-13.858	-6.992	-11.398
39.74	-13.506	-7.059	-10.939
39.76	-12.891	-7.152	-10.496
39.78	-12.408	-7.255	-10.059
39.8	-11.661	-7.341	-9.611
39.82	-11.221	-7.394	-9.142
39.84	-10.738	-7.416	-8.655
39.86	-10.167	-7.42	-8.155
39.88	-9.639	-7.408	-7.645
39.9	-9.376	-7.379	-7.125
39.92	-8.848	-7.343	-6.6
39.94	-8.541	-7.322	-6.084
39.96	-8.057	-7.326	-5.584
[truncated: 7,993 more rows]
